# Supplementary material for: Does capitation affect patient satisfaction and prevalence of out-of-pocket payments in the insured? A propensity score analysis of Ghana’s demographic and health survey data
Source: BMC Health Serv Res. 2019 Oct 22;19:732. doi: 10.1186/s12913-019-4581-4 (PMC6805416; doi:10.1186/s12913-019-4581-4)
Supplement: Supplementary file 2 — Additional file 2. Manuscript’s dataset – data for the sub-sample analysed in this study. [file 12913_2019_4581_MOESM2_ESM.xlsx]

## Sheet: Sheet1
no	caseid	cntry_code	cluster_id	hsehld_no	usual_visit	intview_date	source	smple_stra	prsmple_unit	smple_wght	DEMO_PHICS	age2_grp	male	SOCIO_ECON	exposure	region	urban	ethnicity3	religion2	educ2	educ_yrs	wealth_quintile	wlth_index	LIFE_STYLE	told_hyper	HI_COVERAGE	HI_status	mutual_HI	employer_HI	private_HI	nhis_HI	other_HI	NHIS	nhispaymode	valid_nhis3	LST_6_Visit	visit_hf	private_hf	service_type2	payment_mode	out_of_pocket	enoughtime	consent	friendly	scale1openhrs	scale2ease	scale3twait	scale4tconsult	scale5tlab
1	4 3 5	GH6	4	3	usual resident	1377	men_GDHS_14.dta	central urban	4	735055		15-19	male		unexposed	central	urban	other	islam	secondary/higher	12	richer	40125		yes		yes	no	no	no	yes	no		yes, paid by a relative / friend	yes, valid		yes	public/gov't	outpatient	national health insurance	no	yes	no	yes	good	very easy	satisfied	satisfied	satisfied
2	422 3	GH6	4	22	usual resident	1377	men_GDHS_14.dta	central urban	4	735055		15-19	male		unexposed	central	urban	akan	christianity	secondary/higher	10	richer	75608		no		yes	no	no	no	yes	no		yes, paid by a relative / friend	yes, valid		yes	public/gov't	outpatient	cash	yes	yes	yes	yes	very good	easy	fairly satisfied	fairly satisfied	satisfied
3	5 4 1	GH6	5	4	usual resident	1380	men_GDHS_14.dta	northern rural	5	401202		40-44	male		unexposed	northern	rural	other	christianity	none	0	poorest	-264492		no		yes	no	no	no	yes	no		yes, paid myself	yes, valid		yes	private	outpatient	cash	yes	no	no	yes	good	easy	satisfied	satisfied
4	6 8 2	GH6	6	8	usual resident	1377	men_GDHS_14.dta	ashanti urban	6	1626674		15-19	male		exposed	ashanti	urban	other	christianity	secondary/higher	11	richest	103773		no		yes	no	no	no	yes	no		yes, paid by a relative / friend	yes, valid		yes	public/gov't	outpatient	combination of any of the above	yes	yes	yes	yes	good	fairly easy	very dissatisfied	satisfied	very dissatisfied
5	810 1	GH6	8	10	usual resident	1378	men_GDHS_14.dta	ashanti urban	8	1632020		30-34	male		exposed	ashanti	urban	ewe	christianity	secondary/higher	15	richest	164857		no		yes	no	no	no	yes	no		yes, paid myself	yes, valid		yes	public/gov't	outpatient	national health insurance	no	yes	yes	yes	good	easy	satisfied	satisfied	satisfied
6	925 1	GH6	9	25	usual resident	1378	men_GDHS_14.dta	central urban	9	591993		25-29	male		unexposed	central	urban	akan	christianity	secondary/higher	12	richer	43865		no		yes	no	no	no	yes	no		yes, paid myself	yes, valid		yes	private	outpatient	national health insurance	no	yes	yes	yes	very good	very easy	satisfied	satisfied	satisfied
7	1117 1	GH6	11	17	usual resident	1377	men_GDHS_14.dta	brong ahafo rural	11	858590		over44	male		unexposed	brong ahafo	rural	akan	christianity	secondary/higher	7	poorest	-90422		no		yes	no	no	no	yes	no		yes, paid myself	yes, valid		yes	public/gov't	outpatient	national health insurance	no	yes	yes	yes	very good	fairly easy	satisfied	satisfied	satisfied
8	13 6 1	GH6	13	6	usual resident	1379	men_GDHS_14.dta	brong ahafo urban	13	818721		35-39	male		unexposed	brong ahafo	urban	akan	christianity	secondary/higher	8	poorer	-47606		no		yes	no	no	no	yes	no		yes, paid myself	yes, valid		yes	public/gov't	outpatient	national health insurance	no	yes	yes	yes	good	easy	satisfied	satisfied	very satisfied
9	1410 1	GH6	14	10	usual resident	1379	men_GDHS_14.dta	northern urban	14	434894		40-44	male		unexposed	northern	urban	other	islam	secondary/higher	18	middle	30032		yes		yes	no	no	no	yes	no		yes, paid by employer/ssnit	yes, valid		yes	public/gov't	outpatient	cash	yes	yes	yes	yes	good	difficult	very dissatisfied	satisfied	very dissatisfied
10	16 7 1	GH6	16	7	usual resident	1379	men_GDHS_14.dta	eastern rural	16	1216974		30-34	male		unexposed	eastern	rural	akan	christianity	primary education	5	poorer	-60171		yes		yes	no	no	no	yes	no		yes, paid myself	yes, valid		yes	public/gov't	outpatient	national health insurance	no	yes	yes	yes	good	easy	satisfied	satisfied	satisfied
11	1721 3	GH6	17	21	usual resident	1378	men_GDHS_14.dta	brong ahafo urban	17	586695		20-24	male		unexposed	brong ahafo	urban	other	islam	secondary/higher	12	richest	108014		no		yes	no	no	no	yes	no		yes, paid myself	yes, valid		yes	public/gov't	outpatient	national health insurance	no	yes	yes	yes	good	fairly easy	satisfied	fairly satisfied	satisfied
12	21 9 1	GH6	21	9	usual resident	1378	men_GDHS_14.dta	northern rural	21	609078		35-39	male		unexposed	northern	rural	other	christianity	none	0	poorest	-83558		no		yes	no	no	no	yes	no		yes, paid myself	yes, valid		yes	public/gov't	outpatient	national health insurance	no	yes	yes	yes	good	easy	satisfied	satisfied	satisfied
13	27 9 9	GH6	27	9	usual resident	1378	men_GDHS_14.dta	northern rural	27	638174		20-24	male		unexposed	northern	rural	other	other	none	0	poorest	-245470		no		yes	no	no	no	yes	no		yes, paid myself	yes, valid		yes	public/gov't	outpatient	national health insurance	no	yes	yes	yes	good	easy	satisfied	satisfied
14	29 6 1	GH6	29	6	usual resident	1378	men_GDHS_14.dta	ashanti urban	29	1282592		40-44	male		exposed	ashanti	urban	akan	christianity	secondary/higher	11	richest	137963		no		yes	no	no	no	yes	no		yes, paid myself	yes, valid		yes	private	outpatient	national health insurance	no	yes	yes	yes	very good	easy	satisfied	satisfied	satisfied
15	2911 1	GH6	29	11	usual resident	1378	men_GDHS_14.dta	ashanti urban	29	1282592		35-39	male		exposed	ashanti	urban	akan	christianity	secondary/higher	9	richest	170283		no		yes	no	no	no	yes	no		yes, paid myself	yes, valid		yes	private	outpatient	national health insurance	no	yes	yes	yes	good	easy	satisfied	satisfied	satisfied
16	2912 1	GH6	29	12	usual resident	1378	men_GDHS_14.dta	ashanti urban	29	1282592		over44	male		exposed	ashanti	urban	akan	other	secondary/higher	6	middle	1829		no		yes	no	no	no	yes	no		yes, paid myself	yes, valid		yes	public/gov't	outpatient	national health insurance	no	yes	yes	yes	good	difficult	not satisfied	not satisfied	satisfied
17	33 7 1	GH6	33	7	usual resident	1378	men_GDHS_14.dta	eastern rural	33	765928		over44	male		unexposed	eastern	rural	other	other	primary education	4	poorest	-84454		no		yes	no	no	no	yes	no		yes, paid myself	yes, valid		yes	public/gov't	outpatient	cash	yes	yes	yes	yes	good	fairly easy	satisfied	satisfied	fairly satisfied
18	3326 1	GH6	33	26	usual resident	1378	men_GDHS_14.dta	eastern rural	33	765928		over44	male		unexposed	eastern	rural	other	christianity	secondary/higher	10	poorer	-54970		no		yes	no	no	no	yes	no		yes, paid myself	yes, valid		yes	public/gov't	outpatient	national health insurance	no	yes	no	yes	good	easy	satisfied	satisfied	satisfied
19	3415 1	GH6	34	15	usual resident	1377	men_GDHS_14.dta	eastern rural	34	380304		35-39	male		unexposed	eastern	rural	ewe	christianity	secondary/higher	11	poorer	-52115		no		yes	no	no	no	yes	no		yes, paid myself	yes, valid		yes	public/gov't	outpatient	national health insurance	no	yes	yes	yes	fair	easy	fairly satisfied	satisfied	satisfied
20	3616 1	GH6	36	16	usual resident	1377	men_GDHS_14.dta	central urban	36	1135278		30-34	male		unexposed	central	urban	akan	christianity	secondary/higher	12	richest	101044		no		yes	no	no	no	yes	no		yes, paid myself	yes, valid		yes	public/gov't	outpatient	cash	yes	yes	yes	yes	good	easy	satisfied	satisfied	satisfied
21	3813 1	GH6	38	13	usual resident	1377	men_GDHS_14.dta	western urban	38	892580		35-39	male		unexposed	western	urban	ewe	christianity	secondary/higher	12	richest	133785		no		yes	no	no	no	yes	no		yes, paid myself	yes, valid		yes	public/gov't	outpatient	national health insurance	no	yes	yes	yes	fair	easy	satisfied	fairly satisfied	fairly satisfied
22	3828 3	GH6	38	28	usual resident	1378	men_GDHS_14.dta	western urban	38	892580		25-29	male		unexposed	western	urban	akan	christianity	secondary/higher	16	richest	166333		no		yes	no	no	no	yes	no		yes, paid myself	yes, valid		yes	public/gov't	outpatient	cash	yes	no	no	no	good	fairly easy	satisfied	satisfied	satisfied
23	41 6 1	GH6	41	6	usual resident	1377	men_GDHS_14.dta	central rural	41	968224		over44	male		unexposed	central	rural	akan	christianity	secondary/higher	10	poorer	-28442		no		yes	no	no	no	yes	no		no, other	yes, valid		yes	public/gov't	outpatient	national health insurance	no	yes	yes	yes	good	very easy	very dissatisfied	satisfied	satisfied
24	43 3 1	GH6	43	3	usual resident	1379	men_GDHS_14.dta	volta urban	43	1094555		25-29	male		unexposed	volta	urban	ewe	christianity	secondary/higher	9	middle	6826		yes		yes	no	no	no	yes	no		yes, paid myself	yes, valid		yes	public/gov't	outpatient	cash	yes	yes	yes	yes	good	easy	satisfied	very satisfied	satisfied
25	4323 1	GH6	43	23	usual resident	1379	men_GDHS_14.dta	volta urban	43	1094555		over44	male		unexposed	volta	urban	ewe	christianity	secondary/higher	10	richer	71523		yes		yes	no	no	no	yes	no		yes, paid myself	yes, valid		yes	public/gov't	outpatient	national health insurance	no	yes	yes	yes	good	very easy	satisfied	satisfied	satisfied
26	4623 1	GH6	46	23	usual resident	1378	men_GDHS_14.dta	brong ahafo rural	46	611404		40-44	male		unexposed	brong ahafo	rural	other	christianity	primary education	3	middle	-20120		no		yes	no	no	no	yes	no		yes, paid myself	yes, valid		yes	private	outpatient	national health insurance	no	yes	yes	yes	good	easy	satisfied	satisfied	satisfied
27	4711 1	GH6	47	11	usual resident	1379	men_GDHS_14.dta	volta urban	47	792650		25-29	male		unexposed	volta	urban	ewe	christianity	secondary/higher	7	middle	-19088		no		yes	no	no	no	yes	no		no, other	yes, valid		yes	public/gov't	outpatient	cash	yes	yes	yes	yes	good	easy	fairly satisfied	satisfied	satisfied
28	4912 1	GH6	49	12	usual resident	1378	men_GDHS_14.dta	greater accra urban	49	1674016		over44	male		unexposed	greater accra	urban	other	islam	secondary/higher	10	richer	37683		yes		yes	no	no	no	yes	no		yes, paid myself	yes, valid		yes	public/gov't	outpatient	national health insurance	no	yes	yes	yes	very good	easy	satisfied	very satisfied	not satisfied
29	50 9 1	GH6	50	9	usual resident	1379	men_GDHS_14.dta	upper west rural	50	308515		40-44	male		unexposed	upper west	rural	mole_dagbani	christianity	none	0	poorest	-125798		no		yes	no	no	no	yes	no		yes, paid myself	yes, valid		yes	public/gov't	outpatient	national health insurance	no	yes	yes	yes	very good	easy	satisfied	satisfied	satisfied
30	5014 1	GH6	50	14	usual resident	1379	men_GDHS_14.dta	upper west rural	50	308515		over44	male		unexposed	upper west	rural	mole_dagbani	christianity	none	0	poorest	-107798		no		yes	no	no	no	yes	no		yes, paid by a relative / friend	yes, valid		yes	public/gov't	outpatient	national health insurance	no	yes	yes	yes	good	easy	satisfied	satisfied	satisfied
31	5028 1	GH6	50	28	usual resident	1379	men_GDHS_14.dta	upper west rural	50	308515		over44	male		unexposed	upper west	rural	mole_dagbani	christianity	none	0	poorest	-154103		no		yes	no	no	no	yes	no		yes, paid myself	yes, valid		yes	public/gov't	outpatient	national health insurance	no	yes	yes	yes	very good	difficult	satisfied	satisfied	satisfied
32	51 5 1	GH6	51	5	usual resident	1378	men_GDHS_14.dta	brong ahafo rural	51	827145		over44	male		unexposed	brong ahafo	rural	akan	christianity	secondary/higher	10	poorest	-116102		yes		yes	no	no	no	yes	no		yes, paid myself	yes, valid		yes	private	outpatient	national health insurance	no	no	no	yes	good	difficult	satisfied	satisfied	satisfied
33	5128 1	GH6	51	28	usual resident	1378	men_GDHS_14.dta	brong ahafo rural	51	827145		over44	male		unexposed	brong ahafo	rural	akan	christianity	none	0	poorer	-44658		no		yes	no	no	no	yes	no		yes, paid myself	yes, valid		yes	public/gov't	outpatient	national health insurance	no	yes	yes	yes	good	easy	fairly satisfied	satisfied	satisfied
34	5316 1	GH6	53	16	usual resident	1377	men_GDHS_14.dta	western urban	53	1002383		over44	male		unexposed	western	urban	other	islam	secondary/higher	10	richer	55328		no		yes	no	no	no	yes	no		yes, paid myself	yes, valid		yes	public/gov't	outpatient	cash	yes	yes	yes	yes	good	very easy	very dissatisfied	fairly satisfied	not satisfied
35	5411 1	GH6	54	11	usual resident	1378	men_GDHS_14.dta	western rural	54	1441018		30-34	male		unexposed	western	rural	other	christianity	primary education	5	middle	575		no		yes	no	no	no	yes	no		yes, paid myself	yes, valid		yes	public/gov't	outpatient	cash	yes	yes	yes	yes	good	easy	very satisfied	satisfied	satisfied
36	55 2 1	GH6	55	2	usual resident	1379	men_GDHS_14.dta	volta rural	55	869378		over44	male		unexposed	volta	rural	ewe	christianity	secondary/higher	10	middle	1262		no		yes	no	no	no	yes	no		yes, paid myself	yes, valid		yes	public/gov't	outpatient	national health insurance	no	yes	yes	yes	good	very easy	satisfied	satisfied
37	5520 1	GH6	55	20	usual resident	1379	men_GDHS_14.dta	volta rural	55	869378		30-34	male		unexposed	volta	rural	ewe	christianity	secondary/higher	15	middle	1050		no		yes	no	no	no	yes	no		yes, paid myself	yes, valid		yes	private	outpatient	national health insurance	no	yes	yes	yes	very good	very easy	very satisfied	very satisfied	very satisfied
38	5632 1	GH6	56	32	usual resident	1377	men_GDHS_14.dta	central rural	56	709302		over44	male		unexposed	central	rural	akan	islam	primary education	6	poorer	-59898		no		yes	no	no	no	yes	no		yes, paid myself	yes, valid		yes	public/gov't	outpatient	national health insurance	no	yes	yes	yes	good	easy	satisfied	satisfied	satisfied
39	58 3 1	GH6	58	3	usual resident	1377	men_GDHS_14.dta	upper west urban	58	156162		20-24	male		unexposed	upper west	urban	other	islam	secondary/higher	12	poorest	-110407		no		yes	no	no	no	yes	no		yes, paid myself	yes, valid		yes	public/gov't	outpatient	national health insurance	no	yes	yes	yes	good	very easy	fairly satisfied	fairly satisfied
40	5831 1	GH6	58	31	usual resident	1377	men_GDHS_14.dta	upper west urban	58	156162		40-44	male		unexposed	upper west	urban	mole_dagbani	islam	secondary/higher	15	richest	151793		no		yes	no	no	no	yes	no		yes, paid by employer/ssnit	yes, valid		yes	public/gov't	outpatient	national health insurance	no	no	yes	yes	good	easy	satisfied	fairly satisfied
41	5833 1	GH6	58	33	usual resident	1377	men_GDHS_14.dta	upper west urban	58	156162		25-29	male		unexposed	upper west	urban	mole_dagbani	christianity	secondary/higher	15	richer	73408		no		yes	no	no	no	yes	no		yes, paid myself	yes, valid		yes	public/gov't	outpatient	national health insurance	no	yes	yes	yes	good	easy	very satisfied	very satisfied
42	5933 1	GH6	59	33	usual resident	1378	men_GDHS_14.dta	brong ahafo rural	59	598682		30-34	male		unexposed	brong ahafo	rural	akan	islam	secondary/higher	9	poorer	-60735		no		yes	no	no	no	yes	no		no, exempt as indigent	yes, valid		yes	public/gov't	outpatient	national health insurance	no	yes	yes	yes	very good	easy	very satisfied	satisfied	satisfied
43	60 6 7	GH6	60	6	usual resident	1379	men_GDHS_14.dta	ashanti urban	60	2634857		20-24	male		exposed	ashanti	urban	akan	christianity	secondary/higher	13	richer	70188		no		yes	no	no	no	yes	no		yes, paid by a relative / friend	yes, valid		yes	private	outpatient	national health insurance	no	yes	yes	yes	good	easy	satisfied	satisfied	satisfied
44	6114 1	GH6	61	14	usual resident	1379	men_GDHS_14.dta	upper west rural	61	173561		25-29	male		unexposed	upper west	rural	mole_dagbani	christianity	secondary/higher	7	poorest	-127288		no		yes	no	no	no	yes	no		yes, paid myself	yes, valid		yes	public/gov't	outpatient	national health insurance	no	yes	yes	yes	good	easy	satisfied	satisfied
45	6215 1	GH6	62	15	usual resident	1379	men_GDHS_14.dta	northern rural	62	645435		30-34	male		unexposed	northern	rural	mole_dagbani	christianity	secondary/higher	14	middle	-22552		no		yes	no	no	no	yes	no		yes, paid by a relative / friend	yes, valid		yes	public/gov't	outpatient	national health insurance	no	yes	yes	yes	good	easy	satisfied	satisfied	satisfied
46	6219 1	GH6	62	19	usual resident	1379	men_GDHS_14.dta	northern rural	62	645435		40-44	male		unexposed	northern	rural	other	islam	none	0	poorest	-97051		no		yes	no	no	no	yes	no		yes, paid myself	yes, valid		yes	public/gov't	outpatient	national health insurance	no	yes	yes	yes	good	easy	satisfied	satisfied	satisfied
47	6222 3	GH6	62	22	usual resident	1379	men_GDHS_14.dta	northern rural	62	645435		15-19	male		unexposed	northern	rural	other	islam	secondary/higher	9	poorest	-103594		no		yes	no	no	no	yes	no		yes, paid by a relative / friend	yes, valid		yes	public/gov't	outpatient	cash	yes	yes	yes	yes	good	easy	fairly satisfied	fairly satisfied	fairly satisfied
48	6223 3	GH6	62	23	usual resident	1379	men_GDHS_14.dta	northern rural	62	645435		25-29	male		unexposed	northern	rural	other	islam	secondary/higher	12	poorest	-91912		no		yes	no	no	no	yes	no		yes, paid myself	yes, valid		yes	public/gov't	outpatient	national health insurance	no	yes	yes	yes	good	easy	satisfied	satisfied	satisfied
49	64 4 1	GH6	64	4	usual resident	1378	men_GDHS_14.dta	upper east urban	64	321897		40-44	male		unexposed	upper east	urban	mole_dagbani	islam	none	0	richer	54216		yes		yes	no	no	no	yes	no		yes, paid myself	yes, valid		yes	public/gov't	outpatient	national health insurance	no	yes	no	yes	good	easy	satisfied	satisfied	satisfied
50	64 7 1	GH6	64	7	usual resident	1378	men_GDHS_14.dta	upper east urban	64	321897		30-34	male		unexposed	upper east	urban	mole_dagbani	christianity	secondary/higher	12	richer	40929		no		yes	no	no	no	yes	no		yes, paid myself	yes, valid		yes	public/gov't	outpatient	national health insurance	no	yes	yes	yes	good	easy	satisfied	satisfied	fairly satisfied
51	6411 1	GH6	64	11	usual resident	1378	men_GDHS_14.dta	upper east urban	64	321897		over44	male		unexposed	upper east	urban	mole_dagbani	islam	none	0	richest	105845		no		yes	no	no	no	yes	no		yes, paid myself	yes, valid		yes	public/gov't	outpatient	national health insurance	no	yes	yes	yes	good	difficult	fairly satisfied	satisfied
52	6516 1	GH6	65	16	usual resident	1377	men_GDHS_14.dta	brong ahafo urban	65	545719		25-29	male		unexposed	brong ahafo	urban	akan	islam	secondary/higher	9	middle	7667		no		yes	no	no	no	yes	no		yes, paid myself	yes, valid		yes	public/gov't	outpatient	national health insurance	no	yes	no	yes	good	fairly easy	satisfied	satisfied	very satisfied
53	66 4 1	GH6	66	4	usual resident	1377	men_GDHS_14.dta	western urban	66	580418		35-39	male		unexposed	western	urban	akan	christianity	secondary/higher	7	richest	107804		yes		yes	no	no	no	yes	no		yes, paid myself	yes, valid		yes	private	outpatient	cash	yes	yes	yes	yes	good	easy	satisfied	satisfied	satisfied
54	6816 1	GH6	68	16	usual resident	1378	men_GDHS_14.dta	western rural	68	745704		over44	male		unexposed	western	rural	akan	christianity	secondary/higher	10	poorer	-57463		no		yes	no	no	no	yes	no		yes, paid myself	yes, valid		yes	public/gov't	outpatient	national health insurance	no	yes	no	yes	good	very difficult	fairly satisfied	satisfied	fairly satisfied
55	7012 1	GH6	70	12	usual resident	1378	men_GDHS_14.dta	northern rural	70	760822		25-29	male		unexposed	northern	rural	akan	christianity	secondary/higher	15	middle	12696		no		yes	no	no	no	yes	no		yes, paid myself	yes, valid		yes	public/gov't	outpatient	national health insurance	no	yes	yes	yes	very good	easy	satisfied	satisfied
56	7017 3	GH6	70	17	usual resident	1378	men_GDHS_14.dta	northern rural	70	760822		15-19	male		unexposed	northern	rural	other	christianity	secondary/higher	8	poorest	-89378		no		yes	no	no	no	yes	no		yes, paid by a relative / friend	yes, valid		yes	public/gov't	outpatient	national health insurance	no	yes	yes	yes	good	easy	satisfied	satisfied
57	7031 1	GH6	70	31	usual resident	1378	men_GDHS_14.dta	northern rural	70	760822		40-44	male		unexposed	northern	rural	other	christianity	none	0	poorer	-61699		no		yes	no	no	no	yes	no		yes, paid myself	yes, valid		yes	public/gov't	outpatient	national health insurance	no	yes	yes	yes	good	easy	satisfied	satisfied
58	7031 5	GH6	70	31	usual resident	1378	men_GDHS_14.dta	northern rural	70	760822		20-24	male		unexposed	northern	rural	other	other	secondary/higher	11	poorer	-61699		no		yes	no	no	no	yes	no		yes, paid myself	yes, valid		yes	public/gov't	outpatient	national health insurance	no	yes	yes	yes	good	easy	satisfied	satisfied
59	72 6 3	GH6	72	6	usual resident	1380	men_GDHS_14.dta	western rural	72	1671096		25-29	male		unexposed	western	rural	akan	christianity	secondary/higher	11	middle	-4894		no		yes	no	no	no	yes	no		yes, paid by a relative / friend	yes, valid		yes	public/gov't	outpatient	national health insurance	no	yes	yes	yes	good	easy	satisfied	very satisfied
60	7225 1	GH6	72	25	usual resident	1380	men_GDHS_14.dta	western rural	72	1671096		35-39	male		unexposed	western	rural	akan	christianity	secondary/higher	9	middle	21603		no		yes	no	no	no	yes	no		yes, paid myself	yes, valid		yes	public/gov't	outpatient	national health insurance	no	no	yes	yes	very good	easy	satisfied	very satisfied
61	7424 3	GH6	74	24	usual resident	1377	men_GDHS_14.dta	upper west urban	74	413611		20-24	male		unexposed	upper west	urban	mole_dagbani	islam	secondary/higher	10	richest	115355		no		yes	no	no	no	yes	no		yes, paid by a relative / friend	yes, valid		yes	public/gov't	outpatient	national health insurance	no	no	yes	yes	good	easy	very dissatisfied	not satisfied
62	7827 1	GH6	78	27	usual resident	1377	men_GDHS_14.dta	northern urban	78	393727		20-24	male		unexposed	northern	urban	mole_dagbani	islam	secondary/higher	12	richer	64876		no		yes	no	no	no	yes	no		yes, paid myself	yes, valid		yes	public/gov't	outpatient	national health insurance	no	yes	yes	yes	fair	fairly easy	fairly satisfied	fairly satisfied	fairly satisfied
63	7833 1	GH6	78	33	usual resident	1377	men_GDHS_14.dta	northern urban	78	393727		30-34	male		unexposed	northern	urban	other	islam	primary education	2	richer	61504		no		yes	no	no	no	yes	no		yes, paid myself	yes, valid		yes	public/gov't	outpatient	national health insurance	no	yes	no	yes	good	easy	satisfied	satisfied
64	8118 1	GH6	81	18	usual resident	1380	men_GDHS_14.dta	western urban	81	807160		over44	male		unexposed	western	urban	akan	christianity	secondary/higher	8	richest	152825		yes		yes	no	no	no	yes	no		yes, paid myself	yes, valid		yes	public/gov't	outpatient	cash	yes	yes	yes	yes	good	easy	very satisfied	satisfied	satisfied
65	8320 1	GH6	83	20	usual resident	1377	men_GDHS_14.dta	greater accra urban	83	1366140		35-39	male		unexposed	greater accra	urban	ewe	christianity	secondary/higher	11	richest	212372		no		yes	no	no	no	yes	no		yes, paid myself	yes, valid		yes	public/gov't	outpatient	combination of any of the above	yes	yes	yes	yes	very good	fairly easy	satisfied	very satisfied	satisfied
66	8327 1	GH6	83	27	usual resident	1377	men_GDHS_14.dta	greater accra urban	83	1366140		over44	male		unexposed	greater accra	urban	ewe	christianity	secondary/higher	15	richest	107560		yes		yes	no	no	no	yes	no		yes, paid myself	yes, valid		yes	private	outpatient	national health insurance	no	yes	no	yes	fair	fairly easy	satisfied	satisfied	satisfied
67	8417 1	GH6	84	17	usual resident	1379	men_GDHS_14.dta	brong ahafo rural	84	684358		over44	male		unexposed	brong ahafo	rural	akan	christianity	secondary/higher	7	poorer	-60893		no		yes	no	no	no	yes	no		yes, paid myself	yes, valid		yes	public/gov't	outpatient	national health insurance	no	yes	yes	yes	good	fairly easy	satisfied	very satisfied	very satisfied
68	85 8 1	GH6	85	8	usual resident	1380	men_GDHS_14.dta	upper east rural	85	332860		35-39	male		unexposed	upper east	rural	mole_dagbani	christianity	secondary/higher	15	middle	24393		no		yes	no	no	no	yes	no		yes, paid myself	yes, valid		yes	private	outpatient	national health insurance	no	yes	yes	yes	good	easy	satisfied	satisfied	satisfied
69	88 6 3	GH6	88	6	usual resident	1378	men_GDHS_14.dta	greater accra urban	88	1653223		15-19	male		unexposed	greater accra	urban	akan	christianity	secondary/higher	13	richest	148471		no		yes	no	no	no	yes	no		yes, paid by a relative / friend	yes, valid		yes	private	outpatient	combination of any of the above	yes	yes	yes	yes	very good	easy	very satisfied	very satisfied	very satisfied
70	8917 1	GH6	89	17	usual resident	1377	men_GDHS_14.dta	greater accra urban	89	1840558		over44	male		unexposed	greater accra	urban	ewe	christianity	secondary/higher	10	richer	90242		yes		yes	no	no	no	yes	no		yes, paid myself	yes, valid		yes	public/gov't	outpatient	national health insurance	no	yes	yes	yes	very good	very easy	very satisfied	satisfied	satisfied
71	9025 3	GH6	90	25	usual resident	1377	men_GDHS_14.dta	ashanti rural	90	1920089		15-19	male		exposed	ashanti	rural	mole_dagbani	christianity	secondary/higher	9	poorest	-87332		no		yes	no	no	no	yes	no		yes, paid by a relative / friend	yes, valid		yes	public/gov't	outpatient	national health insurance	no	yes	no	yes	good	easy	satisfied	satisfied
72	9213 3	GH6	92	13	usual resident	1378	men_GDHS_14.dta	ashanti urban	92	1912726		20-24	male		exposed	ashanti	urban	akan	christianity	secondary/higher	12	middle	32458		no		yes	no	no	no	yes	no		yes, paid myself	yes, valid		yes	private	outpatient	national health insurance	no	yes	yes	yes	fair	easy	fairly satisfied	satisfied	fairly satisfied
73	9329 1	GH6	93	29	usual resident	1377	men_GDHS_14.dta	central urban	93	919823		40-44	male		unexposed	central	urban	akan	christianity	secondary/higher	11	richer	78323		no		yes	no	no	no	yes	no		yes, paid myself	yes, valid		yes	public/gov't	outpatient	cash	yes	yes	yes	yes	very good	very easy	very satisfied	very satisfied	very satisfied
74	96 3 1	GH6	96	3	usual resident	1378	men_GDHS_14.dta	northern rural	96	795569		over44	male		unexposed	northern	rural	other	other	none	0	poorest	-214690		no		yes	no	no	no	yes	no		yes, paid myself	yes, valid		yes	public/gov't	outpatient	national health insurance	no	yes	yes	yes	fair	easy	not satisfied	fairly satisfied
75	96 3 5	GH6	96	3	usual resident	1378	men_GDHS_14.dta	northern rural	96	795569		15-19	male		unexposed	northern	rural	other	other	secondary/higher	7	poorest	-214690		no		yes	no	no	no	yes	no		yes, paid by a relative / friend	yes, valid		yes	public/gov't	outpatient	national health insurance	no	yes	yes	yes	good	easy	satisfied	satisfied
76	9623 1	GH6	96	23	usual resident	1378	men_GDHS_14.dta	northern rural	96	795569		30-34	male		unexposed	northern	rural	other	other	none	0	poorest	-200008		no		yes	no	no	no	yes	no		yes, paid myself	yes, valid		yes	public/gov't	outpatient	national health insurance	no	yes	yes	yes	poor	difficult	not satisfied	not satisfied
77	9629 5	GH6	96	29	usual resident	1378	men_GDHS_14.dta	northern rural	96	795569		20-24	male		unexposed	northern	rural	other	christianity	secondary/higher	9	poorest	-156429		no		yes	no	no	no	yes	no		yes, paid by a relative / friend	yes, valid		yes	public/gov't	outpatient	cash	yes	yes	yes	yes	good	easy	satisfied	satisfied
78	97 6 2	GH6	97	6	usual resident	1379	men_GDHS_14.dta	brong ahafo rural	97	512647		15-19	male		unexposed	brong ahafo	rural	other	christianity	secondary/higher	8	poorer	-46519		no		yes	no	no	no	yes	no		yes, paid by a relative / friend	yes, valid		yes	public/gov't	outpatient	national health insurance	no	yes	yes	yes	good	easy	satisfied	fairly satisfied	satisfied
79	97 7 3	GH6	97	7	usual resident	1379	men_GDHS_14.dta	brong ahafo rural	97	512647		15-19	male		unexposed	brong ahafo	rural	other	christianity	secondary/higher	7	poorer	-44155		no		yes	no	no	no	yes	no		yes, paid by a relative / friend	yes, valid		yes	public/gov't	outpatient	national health insurance	no	yes	yes	yes	good	easy	satisfied	fairly satisfied	satisfied
80	97 8 3	GH6	97	8	usual resident	1379	men_GDHS_14.dta	brong ahafo rural	97	512647		15-19	male		unexposed	brong ahafo	rural	other	other	primary education	4	middle	-19342		no		yes	no	no	no	yes	no		yes, paid by a relative / friend	yes, valid		yes	public/gov't	outpatient	national health insurance	no	yes	yes	yes	fair	easy	satisfied	fairly satisfied	satisfied
81	9718 1	GH6	97	18	usual resident	1379	men_GDHS_14.dta	brong ahafo rural	97	512647		over44	male		unexposed	brong ahafo	rural	other	christianity	secondary/higher	10	poorer	-25612		no		yes	no	no	no	yes	no		yes, paid myself	yes, valid		yes	public/gov't	outpatient	national health insurance	no	yes	yes	yes	good	easy	satisfied	fairly satisfied	satisfied
82	9720 1	GH6	97	20	usual resident	1379	men_GDHS_14.dta	brong ahafo rural	97	512647		30-34	male		unexposed	brong ahafo	rural	akan	christianity	secondary/higher	9	poorer	-41725		no		yes	no	no	no	yes	no		yes, paid myself	yes, valid		yes	public/gov't	outpatient	national health insurance	no	yes	no	yes	good	easy	satisfied	fairly satisfied	satisfied
83	9728 1	GH6	97	28	usual resident	1379	men_GDHS_14.dta	brong ahafo rural	97	512647		25-29	male		unexposed	brong ahafo	rural	akan	christianity	secondary/higher	12	poorer	-57002		no		yes	no	no	no	yes	no		yes, paid myself	yes, valid		yes	public/gov't	outpatient	national health insurance	no	yes	yes	yes	very good	easy	satisfied	satisfied	very satisfied
84	9731 1	GH6	97	31	usual resident	1379	men_GDHS_14.dta	brong ahafo rural	97	512647		over44	male		unexposed	brong ahafo	rural	other	christianity	primary education	6	poorer	-44480		no		yes	no	no	no	yes	no		yes, paid myself	yes, valid		yes	public/gov't	outpatient	national health insurance	no	yes	yes	yes	good	easy	satisfied	fairly satisfied	satisfied
85	9820 3	GH6	98	20	usual resident	1377	men_GDHS_14.dta	eastern urban	98	1284519		20-24	male		unexposed	eastern	urban	akan	christianity	secondary/higher	12	richest	121284		no		yes	no	no	no	yes	no		yes, paid by a relative / friend	yes, valid		yes	public/gov't	outpatient	national health insurance	no	yes	yes	yes	very good	very easy	satisfied	satisfied	satisfied
86	10328 1	GH6	103	28	usual resident	1377	men_GDHS_14.dta	brong ahafo rural	103	848043		over44	male		unexposed	brong ahafo	rural	akan	christianity	secondary/higher	15	richer	62740		yes		yes	no	no	no	yes	no		yes, paid by employer/ssnit	yes, valid		yes	public/gov't	outpatient	national health insurance	no	yes	yes	yes	good	very easy	fairly satisfied	fairly satisfied	fairly satisfied
87	10533 2	GH6	105	33	usual resident	1379	men_GDHS_14.dta	volta urban	105	1460636		25-29	male		unexposed	volta	urban	ewe	christianity	secondary/higher	13	middle	18195		no		yes	no	no	no	yes	no		yes, paid myself	yes, valid		yes	public/gov't	outpatient	national health insurance	no	yes	yes	yes	good	very easy	satisfied	satisfied	satisfied
88	10610 1	GH6	106	10	usual resident	1379	men_GDHS_14.dta	western urban	106	1143080		25-29	male		unexposed	western	urban	akan	christianity	secondary/higher	13	richer	91512		no		yes	no	no	no	yes	no		yes, paid myself	yes, valid		yes	public/gov't	outpatient	national health insurance	no	yes	yes	yes	very good	very easy	satisfied	satisfied
89	10614 1	GH6	106	14	usual resident	1379	men_GDHS_14.dta	western urban	106	1143080		35-39	male		unexposed	western	urban	akan	christianity	secondary/higher	12	richest	151457		no		yes	no	no	no	yes	no		yes, paid myself	yes, valid		yes	public/gov't	outpatient	national health insurance	no	yes	no	yes	very good	difficult	fairly satisfied	satisfied
90	10615 1	GH6	106	15	usual resident	1379	men_GDHS_14.dta	western urban	106	1143080		30-34	male		unexposed	western	urban	akan	christianity	secondary/higher	12	richest	112314		no		yes	no	no	no	yes	no		yes, paid myself	yes, valid		yes	private	outpatient	national health insurance	no	yes	yes	yes	good	difficult	satisfied	satisfied
91	10627 2	GH6	106	27	usual resident	1379	men_GDHS_14.dta	western urban	106	1143080		20-24	male		unexposed	western	urban	akan	christianity	secondary/higher	13	richer	79385		yes		yes	no	no	no	yes	no		yes, paid by a relative / friend	yes, valid		yes	public/gov't	outpatient	national health insurance	no	yes	no	yes	good	easy	fairly satisfied	not satisfied	fairly satisfied
92	107 7 1	GH6	107	7	usual resident	1379	men_GDHS_14.dta	volta rural	107	893613		over44	male		unexposed	volta	rural	ewe	christianity	secondary/higher	10	poorest	-80177		no		yes	no	no	no	yes	no		yes, paid myself	yes, valid		yes	public/gov't	outpatient	national health insurance	no	yes	yes	yes	very good	very easy	satisfied	satisfied	satisfied
93	10721 1	GH6	107	21	usual resident	1379	men_GDHS_14.dta	volta rural	107	893613		over44	male		unexposed	volta	rural	ewe	christianity	primary education	3	poorer	-67918		no		yes	no	no	no	yes	no		yes, paid myself	yes, valid		yes	public/gov't	outpatient	national health insurance	no	yes	yes	yes	poor	very easy	fairly satisfied	fairly satisfied	satisfied
94	10723 3	GH6	107	23	usual resident	1379	men_GDHS_14.dta	volta rural	107	893613		15-19	male		unexposed	volta	rural	ewe	christianity	secondary/higher	8	poorest	-73738		no		yes	no	no	no	yes	no		yes, paid by a relative / friend	yes, valid		yes	public/gov't	outpatient	national health insurance	no	yes	yes	yes	good	easy	satisfied	satisfied	satisfied
95	10730 1	GH6	107	30	usual resident	1379	men_GDHS_14.dta	volta rural	107	893613		over44	male		unexposed	volta	rural	ewe	christianity	secondary/higher	10	poorer	-67845		no		yes	no	no	no	yes	no		yes, paid myself	yes, valid		yes	public/gov't	outpatient	national health insurance	no	yes	yes	yes	good	easy	satisfied	satisfied	satisfied
96	10914 1	GH6	109	14	usual resident	1378	men_GDHS_14.dta	upper west urban	109	144666		over44	male		unexposed	upper west	urban	mole_dagbani	christianity	secondary/higher	16	middle	26939		no		yes	no	no	no	yes	no		yes, paid by employer/ssnit	yes, valid		yes	public/gov't	outpatient	national health insurance	no	yes	yes	yes	very good	very easy	very satisfied	very satisfied	very satisfied
97	10915 1	GH6	109	15	usual resident	1378	men_GDHS_14.dta	upper west urban	109	144666		over44	male		unexposed	upper west	urban	mole_dagbani	christianity	primary education	3	poorer	-46407		no		yes	no	no	no	yes	no		yes, paid myself	yes, valid		yes	public/gov't	outpatient	national health insurance	no	yes	yes	yes	good	fairly easy	fairly satisfied	fairly satisfied	fairly satisfied
98	113 5 3	GH6	113	5	usual resident	1378	men_GDHS_14.dta	western urban	113	594414		15-19	male		unexposed	western	urban	akan	christianity	secondary/higher	12	richest	155808		no		yes	no	no	no	yes	no		yes, paid by a relative / friend	yes, valid		yes	private	outpatient	national health insurance	no	no	yes	yes	very good	fairly easy	not satisfied	satisfied	satisfied
99	12118 1	GH6	121	18	usual resident	1378	men_GDHS_14.dta	central rural	121	810055		40-44	male		unexposed	central	rural	other	christianity	primary education	5	middle	9983		no		yes	no	no	no	yes	no		yes, paid myself	yes, valid		yes	public/gov't	outpatient	national health insurance	no	yes	yes	yes	very good	easy	satisfied	satisfied	satisfied
100	12215 5	GH6	122	15	usual resident	1380	men_GDHS_14.dta	brong ahafo urban	122	934495		25-29	male		unexposed	brong ahafo	urban	mole_dagbani	islam	secondary/higher	15	richest	125408		no		yes	no	no	no	yes	no		yes, paid myself	yes, valid		yes	public/gov't	outpatient	national health insurance	no	yes	no	yes	good	easy	not satisfied	fairly satisfied	fairly satisfied
101	12221 1	GH6	122	21	usual resident	1380	men_GDHS_14.dta	brong ahafo urban	122	934495		over44	male		unexposed	brong ahafo	urban	akan	christianity	secondary/higher	10	richer	50879		no		yes	no	no	no	yes	no		yes, paid myself	yes, valid		yes	private	outpatient	national health insurance	no	yes	yes	yes	good	fairly easy	satisfied	satisfied	very satisfied
102	12225 1	GH6	122	25	usual resident	1380	men_GDHS_14.dta	brong ahafo urban	122	934495		40-44	male		unexposed	brong ahafo	urban	akan	christianity	secondary/higher	12	richer	80286		yes		yes	no	no	no	yes	no		yes, paid myself	yes, valid		yes	private	outpatient	cash	yes	yes	yes	yes	very good	easy	satisfied	satisfied	very satisfied
103	12618 3	GH6	126	18	usual resident	1377	men_GDHS_14.dta	central urban	126	594134		15-19	male		unexposed	central	urban	akan	christianity	secondary/higher	7	poorest	-75753		no		yes	no	no	no	yes	no		yes, paid by a relative / friend	yes, valid		yes	public/gov't	outpatient	cash	yes	yes	yes	yes	fair	easy	satisfied	fairly satisfied	fairly satisfied
104	13118 1	GH6	131	18	usual resident	1378	men_GDHS_14.dta	volta rural	131	854660		over44	male		unexposed	volta	rural	ewe	other	none	0	poorest	-82787		yes		yes	no	no	no	yes	no		yes, paid myself	yes, valid		yes	private	outpatient	cash	yes	no	yes	yes	very good	fairly easy	very dissatisfied	very satisfied	very satisfied
105	132 5 1	GH6	132	5	usual resident	1379	men_GDHS_14.dta	eastern urban	132	1261544		30-34	male		unexposed	eastern	urban	akan	christianity	secondary/higher	15	richer	81808		no		yes	no	no	no	yes	no		yes, paid myself	yes, valid		yes	public/gov't	outpatient	national health insurance	no	yes	yes	yes	good	very easy	satisfied	fairly satisfied	satisfied
106	135 3 1	GH6	135	3	visitor	1377	men_GDHS_14.dta	brong ahafo rural	135	944951		40-44	male		unexposed	brong ahafo	rural	akan	christianity	secondary/higher	10	poorer	-26834		no		yes	no	no	no	yes	no		yes, paid myself	yes, valid		yes	public/gov't	outpatient	national health insurance	no	yes	yes	yes	good	easy	satisfied	satisfied	satisfied
107	13530 1	GH6	135	30	usual resident	1377	men_GDHS_14.dta	brong ahafo rural	135	944951		35-39	male		unexposed	brong ahafo	rural	akan	christianity	secondary/higher	12	middle	6938		no		yes	no	no	no	yes	no		yes, paid myself	yes, valid		yes	private	outpatient	national health insurance	no	yes	no	yes	very good	easy	very satisfied	satisfied	satisfied
108	137 3 1	GH6	137	3	usual resident	1379	men_GDHS_14.dta	upper east rural	137	617394		over44	male		unexposed	upper east	rural	mole_dagbani	islam	none	0	poorest	-204259		yes		yes	no	no	no	yes	no		yes, paid myself	yes, valid		yes	public/gov't	outpatient	national health insurance	no	yes	yes	yes	good	easy	satisfied	satisfied
109	137 8 1	GH6	137	8	usual resident	1379	men_GDHS_14.dta	upper east rural	137	617394		30-34	male		unexposed	upper east	rural	mole_dagbani	islam	secondary/higher	15	poorest	-130537		no		yes	no	no	no	yes	no		yes, paid myself	yes, valid		yes	public/gov't	outpatient	national health insurance	no	yes	yes	yes	good	easy	satisfied	satisfied
110	13719 1	GH6	137	19	usual resident	1379	men_GDHS_14.dta	upper east rural	137	617394		over44	male		unexposed	upper east	rural	mole_dagbani	islam	secondary/higher	10	poorest	-91238		no		yes	no	no	no	yes	no		yes, paid myself	yes, valid		yes	public/gov't	outpatient	national health insurance	no	yes	yes	yes	good	easy	satisfied	satisfied	satisfied
111	14012 11	GH6	140	12	visitor	1379	men_GDHS_14.dta	western rural	140	1644143		over44	male		unexposed	western	rural	akan	islam	secondary/higher	10	poorer	-40561		no		yes	no	no	no	yes	no		yes, paid myself	yes, valid		yes	public/gov't	outpatient	national health insurance	no	yes	no	yes	good	fairly easy	satisfied	satisfied	fairly satisfied
112	14016 1	GH6	140	16	usual resident	1379	men_GDHS_14.dta	western rural	140	1644143		40-44	male		unexposed	western	rural	akan	christianity	secondary/higher	10	poorer	-42044		no		yes	no	no	no	yes	no		yes, paid myself	yes, valid		yes	public/gov't	outpatient	national health insurance	no	yes	yes	yes	good	difficult	not satisfied	not satisfied	not satisfied
113	14021 8	GH6	140	21	visitor	1379	men_GDHS_14.dta	western rural	140	1644143		30-34	male		unexposed	western	rural	akan	christianity	secondary/higher	15	middle	3326		no		yes	no	no	no	yes	no		yes, paid by employer/ssnit	yes, valid		yes	private	outpatient	national health insurance	no	yes	yes	yes	good	easy	satisfied	fairly satisfied
114	14024 1	GH6	140	24	usual resident	1379	men_GDHS_14.dta	western rural	140	1644143		over44	male		unexposed	western	rural	akan	islam	secondary/higher	10	middle	-22283		no		yes	no	no	no	yes	no		yes, paid myself	yes, valid		yes	public/gov't	outpatient	national health insurance	no	yes	no	yes	very good	very easy	very satisfied	satisfied	satisfied
115	14028 2	GH6	140	28	usual resident	1379	men_GDHS_14.dta	western rural	140	1644143		over44	male		unexposed	western	rural	akan	christianity	secondary/higher	10	poorer	-31598		yes		yes	no	no	no	yes	no		yes, paid myself	yes, valid		yes	public/gov't	outpatient	national health insurance	no	yes	no	yes	very good	easy	satisfied	satisfied
116	141 8 1	GH6	141	8	usual resident	1378	men_GDHS_14.dta	western rural	141	1783829		over44	male		unexposed	western	rural	other	christianity	secondary/higher	9	richer	59361		yes		yes	no	no	no	yes	no		yes, paid myself	yes, valid		yes	public/gov't	outpatient	national health insurance	no	no	no	yes	very good	very easy	not satisfied	satisfied	satisfied
117	14319 2	GH6	143	19	usual resident	1378	men_GDHS_14.dta	western rural	143	1934139		15-19	male		unexposed	western	rural	mole_dagbani	islam	primary education	5	middle	22903		no		yes	no	no	no	yes	no		yes, paid myself	yes, valid		yes	private	outpatient	cash	yes	yes	no	yes	good	difficult	not satisfied	fairly satisfied	satisfied
118	14418 1	GH6	144	18	usual resident	1379	men_GDHS_14.dta	brong ahafo rural	144	662324		over44	male		unexposed	brong ahafo	rural	akan	christianity	secondary/higher	10	poorest	-105336		no		yes	no	no	no	yes	no		yes, paid myself	yes, valid		yes	public/gov't	outpatient	national health insurance	no	yes	yes	yes	good	easy	satisfied	very satisfied	very satisfied
119	14418 3	GH6	144	18	usual resident	1379	men_GDHS_14.dta	brong ahafo rural	144	662324		15-19	male		unexposed	brong ahafo	rural	akan	christianity	secondary/higher	6	poorest	-105336		no		yes	no	no	no	yes	no		yes, paid by a relative / friend	yes, valid		yes	public/gov't	outpatient	national health insurance	no	yes	yes	yes	good	very easy	very satisfied	very satisfied	satisfied
120	14513 1	GH6	145	13	usual resident	1377	men_GDHS_14.dta	ashanti rural	145	1691474		over44	male		exposed	ashanti	rural	akan	other	secondary/higher	10	poorer	-43448		no		yes	no	no	no	yes	no		yes, paid myself	yes, valid		yes	private	outpatient	cash	yes	yes	yes	yes	good	easy	satisfied	satisfied	satisfied
121	14514 3	GH6	145	14	visitor	1377	men_GDHS_14.dta	ashanti rural	145	1691474		over44	male		exposed	ashanti	rural	akan	christianity	secondary/higher	8	poorer	-70108		no		yes	no	no	no	yes	no		yes, paid myself	yes, valid		yes	public/gov't	outpatient	national health insurance	no	yes	yes	yes	good	easy	satisfied	satisfied	satisfied
122	14522 1	GH6	145	22	usual resident	1377	men_GDHS_14.dta	ashanti rural	145	1691474		35-39	male		exposed	ashanti	rural	akan	christianity	secondary/higher	7	poorer	-29914		no		yes	no	no	no	yes	no		yes, paid myself	yes, valid		yes	public/gov't	outpatient	cash	yes	yes	yes	yes	good	easy	satisfied	satisfied	satisfied
123	146 5 1	GH6	146	5	usual resident	1377	men_GDHS_14.dta	greater accra urban	146	1111018		over44	male		unexposed	greater accra	urban	akan	christianity	secondary/higher	6	richer	80576		no		yes	no	no	no	yes	no		yes, paid myself	yes, valid		yes	private	outpatient	cash	yes	yes	no	yes	good	easy	fairly satisfied	satisfied	satisfied
124	147 5 1	GH6	147	5	usual resident	1377	men_GDHS_14.dta	western urban	147	664685		35-39	male		unexposed	western	urban	akan	christianity	secondary/higher	11	richer	87994		no		yes	no	no	no	yes	no		yes, paid by employer/ssnit	yes, valid		yes	public/gov't	outpatient	national health insurance	no	no	yes	no	fair	difficult	not satisfied	very dissatisfied	fairly satisfied
125	147 8 1	GH6	147	8	usual resident	1377	men_GDHS_14.dta	western urban	147	664685		over44	male		unexposed	western	urban	akan	christianity	secondary/higher	14	richest	128283		no		yes	no	no	no	yes	no		yes, paid myself	yes, valid		yes	public/gov't	outpatient	national health insurance	no	yes	yes	yes	fair	fairly easy	fairly satisfied	fairly satisfied	fairly satisfied
126	14716 1	GH6	147	16	usual resident	1377	men_GDHS_14.dta	western urban	147	664685		25-29	male		unexposed	western	urban	akan	christianity	secondary/higher	9	richest	102964		no		yes	no	no	no	yes	no		yes, paid myself	yes, valid		yes	public/gov't	outpatient	national health insurance	no	yes	yes	yes	good	easy	satisfied	satisfied	satisfied
127	14720 1	GH6	147	20	usual resident	1377	men_GDHS_14.dta	western urban	147	664685		40-44	male		unexposed	western	urban	akan	christianity	secondary/higher	10	richer	44348		no		yes	no	no	no	yes	no		yes, paid myself	yes, valid		yes	private	outpatient	national health insurance	no	yes	yes	yes	fair	fairly easy	satisfied	satisfied	satisfied
128	14722 1	GH6	147	22	usual resident	1377	men_GDHS_14.dta	western urban	147	664685		35-39	male		unexposed	western	urban	akan	christianity	secondary/higher	12	richest	147981		no		yes	no	no	no	yes	no		yes, paid myself	yes, valid		yes	private	outpatient	cash	yes	yes	yes	yes	good	easy	satisfied	satisfied	satisfied
129	15028 1	GH6	150	28	usual resident	1377	men_GDHS_14.dta	brong ahafo urban	150	854359		over44	male		unexposed	brong ahafo	urban	akan	other	secondary/higher	10	richer	44509		no		yes	no	no	no	yes	no		yes, paid myself	yes, valid		yes	private	outpatient	national health insurance	no	yes	yes	yes	very good	very easy	very satisfied	very satisfied	very satisfied
130	152 4 1	GH6	152	4	usual resident	1377	men_GDHS_14.dta	central urban	152	597723		35-39	male		unexposed	central	urban	ewe	christianity	secondary/higher	18	richest	143139		no		yes	no	no	no	yes	no		yes, paid by employer/ssnit	yes, valid		yes	private	outpatient	national health insurance	no	yes	yes	yes	very good	fairly easy	very satisfied	very satisfied	satisfied
131	152 6 3	GH6	152	6	usual resident	1377	men_GDHS_14.dta	central urban	152	597723		20-24	male		unexposed	central	urban	akan	christianity	secondary/higher	14	richer	63863		no		yes	no	no	no	yes	no		yes, paid myself	yes, valid		yes	public/gov't	outpatient	national health insurance	no	no	no	yes	fair	fairly easy	not satisfied	fairly satisfied	fairly satisfied
132	15213 1	GH6	152	13	usual resident	1377	men_GDHS_14.dta	central urban	152	597723		over44	male		unexposed	central	urban	akan	christianity	secondary/higher	10	middle	10044		no		yes	no	no	no	yes	no		yes, paid myself	yes, valid		yes	private	outpatient	national health insurance	no	yes	yes	yes	good	easy	satisfied	satisfied	satisfied
133	154 4 1	GH6	154	4	usual resident	1380	men_GDHS_14.dta	brong ahafo urban	154	939579		over44	male		unexposed	brong ahafo	urban	akan	christianity	none	0	middle	31770		no		yes	no	no	no	yes	no		yes, paid myself	yes, valid		yes	public/gov't	outpatient	national health insurance	no	yes	yes	yes	good	very easy	satisfied	fairly satisfied	satisfied
134	154 6 1	GH6	154	6	usual resident	1380	men_GDHS_14.dta	brong ahafo urban	154	939579		30-34	male		unexposed	brong ahafo	urban	mole_dagbani	islam	secondary/higher	9	middle	23329		no		yes	no	no	no	yes	no		yes, paid myself	yes, valid		yes	public/gov't	outpatient	national health insurance	no	yes	yes	yes	very good	easy	satisfied	fairly satisfied	satisfied
135	154 7 1	GH6	154	7	usual resident	1380	men_GDHS_14.dta	brong ahafo urban	154	939579		40-44	male		unexposed	brong ahafo	urban	mole_dagbani	islam	primary education	6	middle	-17152		no		yes	no	no	no	yes	no		yes, paid myself	yes, valid		yes	public/gov't	outpatient	national health insurance	no	yes	yes	yes	good	very easy	satisfied	fairly satisfied	satisfied
136	154 9 1	GH6	154	9	usual resident	1380	men_GDHS_14.dta	brong ahafo urban	154	939579		40-44	male		unexposed	brong ahafo	urban	mole_dagbani	islam	secondary/higher	14	richer	65248		no		yes	no	no	no	yes	no		yes, paid myself	yes, valid		yes	public/gov't	outpatient	national health insurance	no	yes	yes	yes	very good	very easy	satisfied	fairly satisfied	satisfied
137	15431 1	GH6	154	31	usual resident	1380	men_GDHS_14.dta	brong ahafo urban	154	939579		20-24	male		unexposed	brong ahafo	urban	other	islam	secondary/higher	12	richer	61350		no		yes	no	no	no	yes	no		yes, paid myself	yes, valid		yes	private	outpatient	national health insurance	no	yes	yes	yes	good	easy	satisfied	fairly satisfied	satisfied
138	15523 3	GH6	155	23	usual resident	1379	men_GDHS_14.dta	ashanti rural	155	1622562		15-19	male		exposed	ashanti	rural	akan	christianity	secondary/higher	8	middle	7766		no		yes	no	no	no	yes	no		yes, paid myself	yes, valid		yes	private	outpatient	national health insurance	no	yes	yes	yes	very good	easy	satisfied	satisfied	satisfied
139	15625 1	GH6	156	25	usual resident	1378	men_GDHS_14.dta	greater accra rural	156	2430706		25-29	male		unexposed	greater accra	rural	ewe	christianity	secondary/higher	15	middle	6282		no		yes	no	no	no	yes	no		yes, paid myself	yes, valid		yes	private	outpatient	combination of any of the above	yes	yes	yes	no	good	fairly easy	satisfied	satisfied	satisfied
140	15729 1	GH6	157	29	usual resident	1378	men_GDHS_14.dta	brong ahafo rural	157	656711		over44	male		unexposed	brong ahafo	rural	mole_dagbani	christianity	secondary/higher	9	poorest	-108144		no		yes	no	no	no	yes	no		yes, paid myself	yes, valid		yes	public/gov't	outpatient	national health insurance	no	yes	yes	yes	good	easy	satisfied	satisfied	satisfied
141	15731 1	GH6	157	31	usual resident	1378	men_GDHS_14.dta	brong ahafo rural	157	656711		30-34	male		unexposed	brong ahafo	rural	akan	christianity	secondary/higher	15	poorer	-58904		no		yes	no	no	no	yes	no		yes, paid myself	yes, valid		yes	private	outpatient	national health insurance	no	no	yes	yes	very good	very easy	satisfied	satisfied	satisfied
142	15819 3	GH6	158	19	usual resident	1378	men_GDHS_14.dta	central urban	158	692650		20-24	male		unexposed	central	urban	akan	christianity	secondary/higher	13	richest	157148		no		yes	no	no	no	yes	no		yes, paid by a relative / friend	yes, valid		yes	public/gov't	outpatient	cash	yes	yes	yes	yes	very good	very easy	very satisfied	very satisfied	very satisfied
143	16319 1	GH6	163	19	usual resident	1380	men_GDHS_14.dta	brong ahafo urban	163	612510		over44	male		unexposed	brong ahafo	urban	mole_dagbani	christianity	none	0	poorer	-50039		no		yes	no	no	no	yes	no		yes, paid myself	yes, valid		yes	public/gov't	outpatient	national health insurance	no	yes	yes	yes	good	easy	satisfied	satisfied	fairly satisfied
144	16517 1	GH6	165	17	usual resident	1378	men_GDHS_14.dta	ashanti rural	165	1390767		over44	male		exposed	ashanti	rural	other	islam	primary education	1	poorest	-80692		no		yes	no	no	no	yes	no		yes, paid myself	yes, valid		yes	public/gov't	outpatient	national health insurance	no	yes	yes	yes	good	easy	satisfied	fairly satisfied	satisfied
145	16518 1	GH6	165	18	usual resident	1378	men_GDHS_14.dta	ashanti rural	165	1390767		40-44	male		exposed	ashanti	rural	mole_dagbani	other	secondary/higher	9	poorer	-48309		no		yes	no	no	no	yes	no		yes, paid myself	yes, valid		yes	public/gov't	outpatient	national health insurance	no	yes	yes	yes	good	easy	satisfied	fairly satisfied	satisfied
146	16810 4	GH6	168	10	usual resident	1377	men_GDHS_14.dta	western urban	168	998849		20-24	male		unexposed	western	urban	akan	christianity	secondary/higher	16	richest	171190		no		yes	no	no	no	yes	no		yes, paid myself	yes, valid		yes	public/gov't	outpatient	national health insurance	no	no	yes	no	good	fairly easy	not satisfied	not satisfied	not satisfied
147	16823 1	GH6	168	23	usual resident	1377	men_GDHS_14.dta	western urban	168	998849		35-39	male		unexposed	western	urban	akan	christianity	secondary/higher	15	richest	148977		no		yes	no	no	no	yes	no		yes, paid myself	yes, valid		yes	private	outpatient	national health insurance	no	no	yes	yes	very good	very easy	very dissatisfied	satisfied	very dissatisfied
148	16914 2	GH6	169	14	usual resident	1378	men_GDHS_14.dta	upper east urban	169	281417		20-24	male		unexposed	upper east	urban	other	christianity	secondary/higher	15	poorer	-46582		no		yes	no	no	no	yes	no		yes, paid myself	yes, valid		yes	public/gov't	outpatient	national health insurance	no	yes	no	yes	very good	fairly easy	not satisfied	satisfied	satisfied
149	170 1 1	GH6	170	1	usual resident	1378	men_GDHS_14.dta	upper east rural	170	437784		over44	male		unexposed	upper east	rural	mole_dagbani	islam	none	0	poorest	-140365		no		yes	no	no	no	yes	no		yes, paid myself	yes, valid		yes	private	outpatient	cash	yes	yes	no	yes	good	easy	satisfied	satisfied	satisfied
150	17011 1	GH6	170	11	usual resident	1378	men_GDHS_14.dta	upper east rural	170	437784		over44	male		unexposed	upper east	rural	mole_dagbani	islam	none	0	poorest	-114028		no		yes	no	no	no	yes	no		yes, paid myself	yes, valid		yes	public/gov't	outpatient	national health insurance	no	yes	no	yes	good	easy	satisfied	satisfied	fairly satisfied
151	17017 1	GH6	170	17	visitor	1378	men_GDHS_14.dta	upper east rural	170	437784		30-34	male		unexposed	upper east	rural	other	islam	none	0	poorest	-119092		no		yes	no	no	no	yes	no		yes, paid myself	yes, valid		yes	private	outpatient	national health insurance	no	yes	yes	yes	very good	easy	fairly satisfied	satisfied	satisfied
152	17018 3	GH6	170	18	usual resident	1378	men_GDHS_14.dta	upper east rural	170	437784		20-24	male		unexposed	upper east	rural	mole_dagbani	islam	secondary/higher	11	poorest	-137392		no		yes	no	no	no	yes	no		yes, paid by a relative / friend	yes, valid		yes	public/gov't	outpatient	national health insurance	no	yes	yes	yes	good	difficult	very dissatisfied	very satisfied	satisfied
153	17032 1	GH6	170	32	usual resident	1378	men_GDHS_14.dta	upper east rural	170	437784		40-44	male		unexposed	upper east	rural	mole_dagbani	islam	none	0	poorest	-129754		no		yes	no	no	no	yes	no		yes, paid myself	yes, valid		yes	public/gov't	outpatient	national health insurance	no	yes	no	yes	good	easy	satisfied	satisfied	satisfied
154	17129 1	GH6	171	29	usual resident	1378	men_GDHS_14.dta	western rural	171	866962		over44	male		unexposed	western	rural	mole_dagbani	islam	none	0	poorer	-35680		no		yes	no	no	no	yes	no		yes, paid myself	yes, valid		yes	public/gov't	outpatient	national health insurance	no	yes	yes	yes	good	very easy	satisfied	satisfied	satisfied
155	172 2 2	GH6	172	2	usual resident	1378	men_GDHS_14.dta	eastern urban	172	881463		20-24	male		unexposed	eastern	urban	other	christianity	secondary/higher	12	richest	126416		no		yes	no	no	no	yes	no		yes, paid myself	yes, valid		yes	public/gov't	outpatient	cash	yes	yes	yes	yes	good	difficult	satisfied	satisfied	satisfied
156	17212 1	GH6	172	12	usual resident	1378	men_GDHS_14.dta	eastern urban	172	881463		30-34	male		unexposed	eastern	urban	other	christianity	primary education	5	richer	67995		no		yes	no	no	no	yes	no		yes, paid myself	yes, valid		yes	private	outpatient	national health insurance	no	yes	yes	yes	good	easy	satisfied	satisfied	satisfied
157	174 3 1	GH6	174	3	usual resident	1379	men_GDHS_14.dta	eastern urban	174	1260326		25-29	male		unexposed	eastern	urban	ewe	christianity	secondary/higher	13	richer	61031		no		yes	no	no	no	yes	no		yes, paid myself	yes, valid		yes	public/gov't	outpatient	national health insurance	no	yes	yes	yes	fair	easy	fairly satisfied	fairly satisfied	fairly satisfied
158	17416 2	GH6	174	16	visitor	1379	men_GDHS_14.dta	eastern urban	174	1260326		20-24	male		unexposed	eastern	urban	akan	christianity	secondary/higher	13	richest	149828		no		yes	no	no	no	yes	no		yes, paid by a relative / friend	yes, valid		yes	public/gov't	outpatient	cash	yes	yes	yes	yes	good	easy	very satisfied	very satisfied
159	176 2 1	GH6	176	2	usual resident	1377	men_GDHS_14.dta	volta urban	176	606432		35-39	male		unexposed	volta	urban	ewe	christianity	secondary/higher	11	richer	56202		no		yes	no	no	no	yes	no		yes, paid myself	yes, valid		yes	private	outpatient	national health insurance	no	yes	yes	yes	very good	very easy	fairly satisfied	very satisfied	very satisfied
160	17612 1	GH6	176	12	usual resident	1377	men_GDHS_14.dta	volta urban	176	606432		over44	male		unexposed	volta	urban	ewe	christianity	secondary/higher	11	richer	89072		no		yes	no	no	no	yes	no		yes, paid myself	yes, valid		yes	private	outpatient	national health insurance	no	yes	yes	yes	very good	very easy	very satisfied	very satisfied	satisfied
161	17829 1	GH6	178	29	usual resident	1378	men_GDHS_14.dta	ashanti urban	178	1800801		over44	male		exposed	ashanti	urban	akan	christianity	secondary/higher	13	richer	88190		yes		yes	no	no	no	yes	no		yes, paid myself	yes, valid		yes	public/gov't	outpatient	national health insurance	no	yes	no	yes	fair	easy	not satisfied	fairly satisfied	not satisfied
162	180 6 1	GH6	180	6	usual resident	1377	men_GDHS_14.dta	brong ahafo rural	180	767061		25-29	male		unexposed	brong ahafo	rural	akan	christianity	secondary/higher	16	middle	-1222		no		yes	no	no	no	yes	no		yes, paid myself	yes, valid		yes	public/gov't	outpatient	national health insurance	no	yes	no	yes	fair	fairly easy	fairly satisfied	fairly satisfied
163	18020 1	GH6	180	20	usual resident	1377	men_GDHS_14.dta	brong ahafo rural	180	767061		over44	male		unexposed	brong ahafo	rural	akan	christianity	secondary/higher	11	poorer	-34657		no		yes	no	no	no	yes	no		yes, paid myself	yes, valid		yes	public/gov't	outpatient	national health insurance	no	yes	yes	yes	fair	fairly easy	satisfied	satisfied
164	18228 3	GH6	182	28	usual resident	1377	men_GDHS_14.dta	eastern rural	182	761601		15-19	male		unexposed	eastern	rural	akan	christianity	secondary/higher	7	poorest	-74164		no		yes	no	no	no	yes	no		yes, paid by a relative / friend	yes, valid		yes	public/gov't	outpatient	national health insurance	no	yes	yes	yes	good	easy	satisfied	satisfied	satisfied
165	183 7 1	GH6	183	7	usual resident	1379	men_GDHS_14.dta	upper east urban	183	153814		40-44	male		unexposed	upper east	urban	other	islam	secondary/higher	15	middle	18671		yes		yes	no	no	no	yes	no		yes, paid by employer/ssnit	yes, valid		yes	public/gov't	outpatient	national health insurance	no	yes	no	yes	very good	very easy	satisfied	satisfied	very dissatisfied
166	18431 3	GH6	184	31	usual resident	1377	men_GDHS_14.dta	greater accra urban	184	1840460		15-19	male		unexposed	greater accra	urban	akan	christianity	secondary/higher	9	richest	179898		no		yes	no	no	no	yes	no		yes, paid by a relative / friend	yes, valid		yes	public/gov't	outpatient	national health insurance	no	no	yes	yes	very good	fairly easy	fairly satisfied	fairly satisfied	satisfied
167	18930 1	GH6	189	30	usual resident	1379	men_GDHS_14.dta	central urban	189	780826		over44	male		unexposed	central	urban	akan	christianity	secondary/higher	10	richest	121854		yes		yes	no	no	no	yes	no		yes, paid myself	yes, valid		yes	public/gov't	outpatient	national health insurance	no	yes	yes	yes	good	very easy	fairly satisfied	satisfied	satisfied
168	192 8 1	GH6	192	8	usual resident	1377	men_GDHS_14.dta	eastern rural	192	836841		40-44	male		unexposed	eastern	rural	akan	christianity	secondary/higher	11	richer	91488		no		yes	no	no	no	yes	no		yes, paid myself	yes, valid		yes	private	outpatient	national health insurance	no	yes	yes	yes	very good	very easy	satisfied	satisfied	satisfied
169	19217 1	GH6	192	17	usual resident	1377	men_GDHS_14.dta	eastern rural	192	836841		25-29	male		unexposed	eastern	rural	akan	christianity	secondary/higher	12	richer	75875		no		yes	no	no	no	yes	no		yes, paid myself	yes, valid		yes	private	outpatient	national health insurance	no	yes	yes	yes	very good	very easy	satisfied	satisfied	satisfied
170	19230 1	GH6	192	30	usual resident	1377	men_GDHS_14.dta	eastern rural	192	836841		over44	male		unexposed	eastern	rural	akan	christianity	secondary/higher	10	richer	54996		no		yes	no	no	no	yes	no		yes, paid by employer/ssnit	yes, valid		yes	public/gov't	outpatient	national health insurance	no	yes	yes	yes	very good	very easy	satisfied	satisfied	satisfied
171	19433 4	GH6	194	33	visitor	1377	men_GDHS_14.dta	upper east rural	194	574278		15-19	male		unexposed	upper east	rural	mole_dagbani	other	primary education	6	poorest	-160994		no		yes	no	no	no	yes	no		yes, paid myself	yes, valid		yes	public/gov't	outpatient	combination of any of the above	yes	yes	yes	yes	good	very easy	very satisfied	satisfied	very satisfied
172	195 9 1	GH6	195	9	usual resident	1377	men_GDHS_14.dta	upper east rural	195	267038		40-44	male		unexposed	upper east	rural	other	other	none	0	poorest	-116909		no		yes	no	no	no	yes	no		yes, paid myself	yes, valid		yes	public/gov't	outpatient	national health insurance	no	yes	yes	yes	very good	easy	satisfied	fairly satisfied	fairly satisfied
173	19519 1	GH6	195	19	usual resident	1377	men_GDHS_14.dta	upper east rural	195	267038		over44	male		unexposed	upper east	rural	other	other	none	0	poorest	-136879		no		yes	no	no	no	yes	no		yes, paid myself	yes, valid		yes	public/gov't	outpatient	national health insurance	no	yes	yes	yes	good	easy	satisfied	satisfied	satisfied
174	19526 3	GH6	195	26	usual resident	1377	men_GDHS_14.dta	upper east rural	195	267038		15-19	male		unexposed	upper east	rural	mole_dagbani	christianity	secondary/higher	10	poorest	-201499		no		yes	no	no	no	yes	no		yes, paid by a relative / friend	yes, valid		yes	public/gov't	outpatient	national health insurance	no	yes	yes	yes	very good	fairly easy	not satisfied	fairly satisfied	satisfied
175	19916 1	GH6	199	16	usual resident	1378	men_GDHS_14.dta	northern rural	199	553230		40-44	male		unexposed	northern	rural	other	other	none	0	poorest	-96762		no		yes	no	no	no	yes	no		yes, paid myself	yes, valid		yes	private	outpatient	national health insurance	no	yes	yes	yes	good	easy	not satisfied	not satisfied	not satisfied
176	19916 3	GH6	199	16	usual resident	1378	men_GDHS_14.dta	northern rural	199	553230		15-19	male		unexposed	northern	rural	other	christianity	secondary/higher	9	poorest	-96762		no		yes	no	no	no	yes	no		yes, paid by a relative / friend	yes, valid		yes	public/gov't	outpatient	national health insurance	no	yes	yes	yes	fair	very easy	satisfied	satisfied	satisfied
177	20016 1	GH6	200	16	usual resident	1380	men_GDHS_14.dta	northern rural	200	690387		25-29	male		unexposed	northern	rural	other	islam	secondary/higher	15	poorer	-38866		yes		yes	no	no	no	yes	no		yes, paid myself	yes, valid		yes	public/gov't	outpatient	national health insurance	no	yes	yes	yes	good	very easy	very satisfied	very satisfied	satisfied
178	205 9 1	GH6	205	9	usual resident	1377	men_GDHS_14.dta	eastern urban	205	629673		25-29	male		unexposed	eastern	urban	other	christianity	secondary/higher	15	richest	112711		no		yes	no	no	no	yes	no		yes, paid myself	yes, valid		yes	public/gov't	outpatient	national health insurance	no	yes	no	yes	good	fairly easy	not satisfied	satisfied	satisfied
179	20615 1	GH6	206	15	usual resident	1380	men_GDHS_14.dta	upper east rural	206	309852		35-39	male		unexposed	upper east	rural	mole_dagbani	christianity	secondary/higher	12	poorest	-159471		no		yes	no	no	no	yes	no		yes, paid myself	yes, valid		yes	public/gov't	outpatient	national health insurance	no	yes	yes	yes	good	easy	satisfied	satisfied
180	20620 1	GH6	206	20	usual resident	1380	men_GDHS_14.dta	upper east rural	206	309852		over44	male		unexposed	upper east	rural	mole_dagbani	other	none	0	poorest	-116506		yes		yes	no	no	no	yes	no		yes, paid myself	yes, valid		yes	private	outpatient	national health insurance	no	yes	yes	yes	good	difficult	satisfied	satisfied	satisfied
181	20621 3	GH6	206	21	usual resident	1380	men_GDHS_14.dta	upper east rural	206	309852		15-19	male		unexposed	upper east	rural	mole_dagbani	christianity	primary education	6	poorest	-220628		no		yes	no	no	no	yes	no		yes, paid by a relative / friend	yes, valid		yes	public/gov't	outpatient	national health insurance	no	yes	yes	yes	good	easy	satisfied	satisfied
182	207 1 4	GH6	207	1	usual resident	1379	men_GDHS_14.dta	eastern urban	207	627905		20-24	male		unexposed	eastern	urban	akan	christianity	secondary/higher	13	richest	113278		no		yes	no	no	no	yes	no		yes, paid myself	yes, valid		yes	public/gov't	outpatient	national health insurance	no	yes	no	yes	good	difficult	not satisfied	satisfied	not satisfied
183	208 3 1	GH6	208	3	usual resident	1377	men_GDHS_14.dta	central urban	208	1153360		over44	male		unexposed	central	urban	akan	christianity	secondary/higher	16	richest	124604		yes		yes	no	no	no	yes	no		yes, paid by employer/ssnit	yes, valid		yes	private	outpatient	national health insurance	no	no	yes	yes	good	difficult	very dissatisfied	fairly satisfied
184	20918 1	GH6	209	18	usual resident	1378	men_GDHS_14.dta	brong ahafo urban	209	827482		20-24	male		unexposed	brong ahafo	urban	akan	christianity	secondary/higher	13	middle	-9228		no		yes	no	no	no	yes	no		yes, paid by a relative / friend	yes, valid		yes	public/gov't	outpatient	cash	yes	yes	yes	yes	very good	easy	satisfied	very satisfied	satisfied
185	213 2 3	GH6	213	2	usual resident	1377	men_GDHS_14.dta	northern urban	213	261532		15-19	male		unexposed	northern	urban	mole_dagbani	islam	primary education	6	poorer	-57403		no		yes	no	no	no	yes	no		yes, paid by a relative / friend	yes, valid		yes	public/gov't	outpatient	national health insurance	no	yes	yes	yes	fair	easy	satisfied	satisfied	satisfied
186	21619 1	GH6	216	19	usual resident	1378	men_GDHS_14.dta	volta rural	216	856541		30-34	male		unexposed	volta	rural	ewe	christianity	primary education	6	poorer	-28438		yes		yes	no	no	no	yes	no		yes, paid myself	yes, valid		yes	private	outpatient	national health insurance	no	no	yes	no	fair	very easy	satisfied	satisfied
187	21822 1	GH6	218	22	usual resident	1379	men_GDHS_14.dta	western urban	218	747682		over44	male		unexposed	western	urban	ewe	christianity	secondary/higher	16	richest	196607		yes		yes	no	no	no	yes	no		yes, paid myself	yes, valid		yes	private	outpatient	cash	yes	yes	yes	yes	very good	very easy	very satisfied	satisfied	satisfied
188	21825 1	GH6	218	25	usual resident	1379	men_GDHS_14.dta	western urban	218	747682		over44	male		unexposed	western	urban	mole_dagbani	islam	none	0	richer	69935		no		yes	no	no	no	yes	no		yes, paid myself	yes, valid		yes	private	outpatient	national health insurance	no	yes	yes	yes	good	easy	satisfied	satisfied	satisfied
189	21911 3	GH6	219	11	usual resident	1378	men_GDHS_14.dta	upper west rural	219	281902		15-19	male		unexposed	upper west	rural	mole_dagbani	christianity	secondary/higher	7	poorest	-100555		no		yes	no	no	no	yes	no		yes, paid by a relative / friend	yes, valid		yes	public/gov't	outpatient	national health insurance	no	yes	yes	yes	good	very easy	satisfied	satisfied
190	21914 3	GH6	219	14	usual resident	1378	men_GDHS_14.dta	upper west rural	219	281902		15-19	male		unexposed	upper west	rural	mole_dagbani	christianity	secondary/higher	9	poorest	-190769		no		yes	no	no	no	yes	no		yes, paid by a relative / friend	yes, valid		yes	public/gov't	outpatient	national health insurance	no	no	yes	no	good	easy	satisfied	satisfied
191	22015 1	GH6	220	15	usual resident	1379	men_GDHS_14.dta	brong ahafo rural	220	518901		40-44	male		unexposed	brong ahafo	rural	akan	other	secondary/higher	10	middle	-9801		no		yes	no	no	no	yes	no		yes, paid myself	yes, valid		yes	public/gov't	outpatient	national health insurance	no	yes	no	yes	good	easy	satisfied	fairly satisfied	satisfied
192	22031 1	GH6	220	31	usual resident	1379	men_GDHS_14.dta	brong ahafo rural	220	518901		over44	male		unexposed	brong ahafo	rural	akan	other	secondary/higher	9	middle	-12639		no		yes	no	no	no	yes	no		yes, paid myself	yes, valid		yes	private	outpatient	national health insurance	no	yes	yes	yes	good	easy	satisfied	fairly satisfied	satisfied
193	22031 3	GH6	220	31	usual resident	1379	men_GDHS_14.dta	brong ahafo rural	220	518901		15-19	male		unexposed	brong ahafo	rural	akan	christianity	secondary/higher	9	middle	-12639		no		yes	no	no	no	yes	no		yes, paid by a relative / friend	yes, valid		yes	public/gov't	outpatient	national health insurance	no	yes	yes	yes	good	easy	satisfied	satisfied	very satisfied
194	22127 1	GH6	221	27	usual resident	1379	men_GDHS_14.dta	upper east urban	221	222429		25-29	male		unexposed	upper east	urban	mole_dagbani	islam	secondary/higher	12	poorest	-134236		no		yes	no	no	no	yes	no		yes, paid myself	yes, valid		yes	private	outpatient	national health insurance	no	yes	yes	yes	good	easy	satisfied	satisfied	satisfied
195	22214 1	GH6	222	14	usual resident	1380	men_GDHS_14.dta	upper west rural	222	272690		35-39	male		unexposed	upper west	rural	mole_dagbani	christianity	secondary/higher	12	poorer	-71731		no		yes	no	no	no	yes	no		yes, paid myself	yes, valid		yes	public/gov't	outpatient	national health insurance	no	yes	yes	yes	good	fairly easy	fairly satisfied	fairly satisfied	fairly satisfied
196	22223 1	GH6	222	23	usual resident	1380	men_GDHS_14.dta	upper west rural	222	272690		over44	male		unexposed	upper west	rural	mole_dagbani	christianity	primary education	2	poorest	-75428		no		yes	no	no	no	yes	no		yes, paid myself	yes, valid		yes	public/gov't	outpatient	national health insurance	no	yes	yes	yes	good	easy	very satisfied	satisfied	satisfied
197	22718 1	GH6	227	18	usual resident	1379	men_GDHS_14.dta	upper east rural	227	499347		30-34	male		unexposed	upper east	rural	mole_dagbani	christianity	secondary/higher	10	poorest	-162162		no		yes	no	no	no	yes	no		yes, paid myself	yes, valid		yes	public/gov't	outpatient	national health insurance	no	yes	no	yes	good	easy	satisfied	satisfied	satisfied
198	22721 3	GH6	227	21	usual resident	1379	men_GDHS_14.dta	upper east rural	227	499347		15-19	male		unexposed	upper east	rural	mole_dagbani	christianity	primary education	6	poorest	-130659		no		yes	no	no	no	yes	no		yes, paid by a relative / friend	yes, valid		yes	public/gov't	outpatient	national health insurance	no	yes	yes	yes	good	difficult	satisfied	satisfied
199	22729 1	GH6	227	29	usual resident	1379	men_GDHS_14.dta	upper east rural	227	499347		25-29	male		unexposed	upper east	rural	mole_dagbani	christianity	secondary/higher	13	poorest	-179308		no		yes	no	no	no	yes	no		yes, paid myself	yes, valid		yes	public/gov't	outpatient	national health insurance	no	yes	yes	yes	very good	fairly easy	satisfied	satisfied
200	22829 3	GH6	228	29	usual resident	1379	men_GDHS_14.dta	greater accra rural	228	1149814		15-19	male		unexposed	greater accra	rural	other	christianity	secondary/higher	8	richer	34711		no		yes	no	no	no	yes	no		yes, paid by a relative / friend	yes, valid		yes	public/gov't	outpatient	national health insurance	no	yes	yes	yes	very good	very easy	satisfied	satisfied	satisfied
201	23213 1	GH6	232	13	usual resident	1378	men_GDHS_14.dta	volta rural	232	684973		25-29	male		unexposed	volta	rural	ewe	christianity	primary education	2	poorer	-30080		no		yes	no	no	no	yes	no		yes, paid myself	yes, valid		yes	public/gov't	outpatient	national health insurance	no	yes	yes	yes	very good	easy	satisfied	satisfied	very dissatisfied
202	23228 1	GH6	232	28	usual resident	1378	men_GDHS_14.dta	volta rural	232	684973		25-29	male		unexposed	volta	rural	ewe	christianity	primary education	4	poorer	-64537		no		yes	no	no	no	yes	no		yes, paid myself	yes, valid		yes	private	outpatient	cash	yes	yes	yes	yes	good	very easy	satisfied	satisfied	fairly satisfied
203	236 3 1	GH6	236	3	usual resident	1377	men_GDHS_14.dta	ashanti urban	236	1587549		40-44	male		exposed	ashanti	urban	mole_dagbani	islam	secondary/higher	9	richest	100941		no		yes	no	no	no	yes	no		yes, paid myself	yes, valid		yes	public/gov't	outpatient	national health insurance	no	yes	yes	yes	very good	fairly easy	satisfied	satisfied	satisfied
204	23613 5	GH6	236	13	usual resident	1377	men_GDHS_14.dta	ashanti urban	236	1587549		15-19	male		exposed	ashanti	urban	akan	christianity	secondary/higher	11	richest	112232		no		yes	no	no	no	yes	no		yes, paid by a relative / friend	yes, valid		yes	public/gov't	outpatient	combination of any of the above	yes	yes	yes	yes	good	very easy	satisfied	very satisfied
205	237 5 1	GH6	237	5	usual resident	1379	men_GDHS_14.dta	western rural	237	984592		over44	male		unexposed	western	rural	akan	christianity	secondary/higher	10	richer	36431		no		yes	no	no	no	yes	no		yes, paid myself	yes, valid		yes	public/gov't	outpatient	national health insurance	no	yes	no	yes	good	easy	satisfied	satisfied	fairly satisfied
206	241 3 6	GH6	241	3	usual resident	1377	men_GDHS_14.dta	brong ahafo urban	241	694629		20-24	male		unexposed	brong ahafo	urban	akan	christianity	secondary/higher	10	richer	84440		no		yes	no	no	no	yes	no		yes, paid by a relative / friend	yes, valid		yes	private	outpatient	national health insurance	no	yes	yes	yes	good	easy	fairly satisfied
207	24220 3	GH6	242	20	usual resident	1379	men_GDHS_14.dta	eastern urban	242	980297		20-24	male		unexposed	eastern	urban	other	christianity	secondary/higher	9	middle	4456		no		yes	no	no	no	yes	no		yes, paid myself	yes, valid		yes	public/gov't	outpatient	national health insurance	no	yes	yes	yes	very good	easy	not satisfied	satisfied	not satisfied
208	24227 2	GH6	242	27	usual resident	1379	men_GDHS_14.dta	eastern urban	242	980297		15-19	male		unexposed	eastern	urban	akan	christianity	secondary/higher	8	middle	-5636		no		yes	no	no	no	yes	no		yes, paid by a relative / friend	yes, valid		yes	public/gov't	outpatient	national health insurance	no	yes	no	yes	good	fairly easy	satisfied	satisfied	satisfied
209	248 9 2	GH6	248	9	usual resident	1377	men_GDHS_14.dta	central rural	248	832892		over44	male		unexposed	central	rural	akan	islam	secondary/higher	16	richer	81724		yes		yes	no	no	no	yes	no		yes, paid myself	yes, valid		yes	public/gov't	outpatient	national health insurance	no	yes	no	yes	good	easy	fairly satisfied	fairly satisfied	fairly satisfied
210	24832 1	GH6	248	32	usual resident	1377	men_GDHS_14.dta	central rural	248	832892		40-44	male		unexposed	central	rural	akan	christianity	secondary/higher	10	middle	15323		yes		yes	no	no	no	yes	no		yes, paid by employer/ssnit	yes, valid		yes	public/gov't	outpatient	national health insurance	no	yes	yes	yes	good	very easy	very dissatisfied	very dissatisfied	very dissatisfied
211	25019 2	GH6	250	19	usual resident	1377	men_GDHS_14.dta	greater accra urban	250	1675669		15-19	male		unexposed	greater accra	urban	akan	christianity	secondary/higher	11	richer	63770		no		yes	no	no	no	yes	no		yes, paid by a relative / friend	yes, valid		yes	private	outpatient	national health insurance	no	no	no	yes	good	difficult	not satisfied	satisfied	satisfied
212	25113 1	GH6	251	13	usual resident	1379	men_GDHS_14.dta	eastern urban	251	1030405		over44	male		unexposed	eastern	urban	mole_dagbani	islam	none	0	middle	2598		no		yes	no	no	no	yes	no		yes, paid myself	yes, valid		yes	public/gov't	outpatient	national health insurance	no	yes	no	yes	good	easy	satisfied	satisfied	fairly satisfied
213	25131 1	GH6	251	31	usual resident	1380	men_GDHS_14.dta	eastern urban	251	1030405		35-39	male		unexposed	eastern	urban	ewe	christianity	secondary/higher	12	richest	125270		yes		yes	no	no	no	yes	no		yes, paid by employer/ssnit	yes, valid		yes	public/gov't	outpatient	national health insurance	no	yes	yes	yes	good	very easy	very satisfied	satisfied	fairly satisfied
214	25410 3	GH6	254	10	usual resident	1377	men_GDHS_14.dta	central urban	254	748813		15-19	male		unexposed	central	urban	ewe	christianity	secondary/higher	8	richer	56018		no		yes	no	no	no	yes	no		yes, paid by a relative / friend	yes, valid		yes	private	outpatient	national health insurance	no	yes	yes	yes	fair	easy	very dissatisfied	fairly satisfied	not satisfied
215	25422 1	GH6	254	22	usual resident	1377	men_GDHS_14.dta	central urban	254	748813		30-34	male		unexposed	central	urban	akan	islam	secondary/higher	7	middle	28090		no		yes	no	no	no	yes	no		yes, paid myself	yes, valid		yes	public/gov't	outpatient	national health insurance	no	yes	yes	yes	good	easy	very dissatisfied	fairly satisfied	not satisfied
216	257 7 1	GH6	257	7	usual resident	1377	men_GDHS_14.dta	eastern urban	257	747284		over44	male		unexposed	eastern	urban	other	christianity	secondary/higher	15	richest	192093		yes		yes	no	no	no	yes	no		yes, paid myself	yes, valid		yes	private	outpatient	national health insurance	no	yes	yes	yes	very good	very easy	very satisfied	very satisfied	very satisfied
217	25728 7	GH6	257	28	visitor	1377	men_GDHS_14.dta	eastern urban	257	747284		20-24	male		unexposed	eastern	urban	ewe	christianity	secondary/higher	14	richest	200515		no		yes	no	no	no	yes	no		yes, paid by a relative / friend	yes, valid		yes	public/gov't	outpatient	national health insurance	no	yes	yes	yes	very good	very easy	satisfied	satisfied	satisfied
218	25732 1	GH6	257	32	usual resident	1377	men_GDHS_14.dta	eastern urban	257	747284		over44	male		unexposed	eastern	urban	mole_dagbani	christianity	secondary/higher	10	richest	102073		yes		yes	no	no	no	yes	no		yes, paid myself	yes, valid		yes	public/gov't	outpatient	national health insurance	no	yes	yes	yes	very good	very easy	fairly satisfied	satisfied	satisfied
219	258 7 1	GH6	258	7	usual resident	1378	men_GDHS_14.dta	upper east urban	258	232295		35-39	male		unexposed	upper east	urban	other	islam	secondary/higher	12	poorest	-164264		no		yes	no	no	no	yes	no		yes, paid myself	yes, valid		yes	private	outpatient	national health insurance	no	yes	no	yes	good	easy	satisfied	satisfied	satisfied
220	25915 1	GH6	259	15	usual resident	1377	men_GDHS_14.dta	central rural	259	701156		20-24	male		unexposed	central	rural	akan	christianity	secondary/higher	12	richer	79372		no		yes	no	no	no	yes	no		yes, paid by a relative / friend	yes, valid		yes	public/gov't	outpatient	national health insurance	no	yes	yes	yes	good	easy	very satisfied	satisfied	satisfied
221	25928 3	GH6	259	28	usual resident	1377	men_GDHS_14.dta	central rural	259	701156		15-19	male		unexposed	central	rural	mole_dagbani	christianity	secondary/higher	7	richer	48712		no		yes	no	no	no	yes	no		yes, paid by a relative / friend	yes, valid		yes	public/gov't	outpatient	national health insurance	no	yes	no	yes	good	very easy	very dissatisfied	fairly satisfied	fairly satisfied
222	262 1 1	GH6	262	1	usual resident	1379	men_GDHS_14.dta	upper west urban	262	256201		over44	male		unexposed	upper west	urban	mole_dagbani	islam	secondary/higher	8	middle	19850		no		yes	no	no	no	yes	no		yes, paid myself	yes, valid		yes	public/gov't	outpatient	national health insurance	no	yes	yes	yes	good	very easy	very satisfied	very satisfied	very satisfied
223	262 1 6	GH6	262	1	usual resident	1379	men_GDHS_14.dta	upper west urban	262	256201		15-19	male		unexposed	upper west	urban	mole_dagbani	islam	secondary/higher	8	middle	19850		no		yes	no	no	no	yes	no		yes, paid by a relative / friend	yes, valid		yes	public/gov't	outpatient	national health insurance	no	yes	yes	yes	good	very easy	satisfied	satisfied	very satisfied
224	26229 3	GH6	262	29	usual resident	1379	men_GDHS_14.dta	upper west urban	262	256201		20-24	male		unexposed	upper west	urban	mole_dagbani	christianity	secondary/higher	16	richest	157365		no		yes	no	no	no	yes	no		yes, paid by employer/ssnit	yes, valid		yes	public/gov't	outpatient	national health insurance	no	yes	yes	yes	good	fairly easy	fairly satisfied	very satisfied	very dissatisfied
225	26231 1	GH6	262	31	usual resident	1379	men_GDHS_14.dta	upper west urban	262	256201		over44	male		unexposed	upper west	urban	mole_dagbani	christianity	secondary/higher	11	richer	66669		no		yes	no	no	no	yes	no		yes, paid myself	yes, valid		yes	public/gov't	outpatient	national health insurance	no	yes	yes	yes	very good	very difficult	satisfied	very satisfied	very satisfied
226	26410 3	GH6	264	10	usual resident	1378	men_GDHS_14.dta	ashanti rural	264	2635138		15-19	male		exposed	ashanti	rural	other	islam	primary education	6	poorer	-56097		no		yes	no	no	no	yes	no		yes, paid by a relative / friend	yes, valid		yes	private	outpatient	national health insurance	no	yes	yes	yes	good	easy	satisfied	satisfied	fairly satisfied
227	26424 5	GH6	264	24	usual resident	1378	men_GDHS_14.dta	ashanti rural	264	2635138		15-19	male		exposed	ashanti	rural	other	islam	primary education	5	poorer	-29005		no		yes	no	no	no	yes	no		yes, paid by a relative / friend	yes, valid		yes	public/gov't	outpatient	national health insurance	no	yes	yes	yes	very good	easy	satisfied	fairly satisfied	satisfied
228	26433 1	GH6	264	33	usual resident	1378	men_GDHS_14.dta	ashanti rural	264	2635138		25-29	male		exposed	ashanti	rural	other	christianity	primary education	3	poorer	-47368		no		yes	no	no	no	yes	no		yes, paid myself	yes, valid		yes	public/gov't	outpatient	national health insurance	no	yes	yes	yes	very good	very easy	satisfied	satisfied	fairly satisfied
229	26813 1	GH6	268	13	usual resident	1379	men_GDHS_14.dta	volta rural	268	1538294		over44	male		unexposed	volta	rural	ewe	other	secondary/higher	10	poorer	-57415		no		yes	no	no	no	yes	no		yes, paid myself	yes, valid		yes	public/gov't	outpatient	national health insurance	no	yes	yes	yes	good	easy	satisfied	very satisfied	satisfied
230	27228 1	GH6	272	28	usual resident	1380	men_GDHS_14.dta	northern rural	272	861384		30-34	male		unexposed	northern	rural	mole_dagbani	islam	secondary/higher	15	richest	109822		no		yes	no	no	no	yes	no		yes, paid myself	yes, valid		yes	public/gov't	outpatient	national health insurance	no	yes	yes	yes	good	easy	satisfied	satisfied	fairly satisfied
231	27511 1	GH6	275	11	usual resident	1379	men_GDHS_14.dta	northern rural	275	587807		40-44	male		unexposed	northern	rural	other	other	none	0	poorest	-225493		no		yes	no	no	no	yes	no		yes, paid myself	yes, valid		yes	public/gov't	outpatient	national health insurance	no	yes	yes	yes	good	easy	satisfied	satisfied
232	27616 1	GH6	276	16	usual resident	1377	men_GDHS_14.dta	volta rural	276	984231		over44	male		unexposed	volta	rural	ewe	christianity	secondary/higher	14	poorer	-62904		yes		yes	no	no	no	yes	no		yes, paid myself	yes, valid		yes	private	outpatient	national health insurance	no	yes	yes	yes	good	easy	very dissatisfied	satisfied	satisfied
233	27624 1	GH6	276	24	usual resident	1377	men_GDHS_14.dta	volta rural	276	984231		40-44	male		unexposed	volta	rural	ewe	other	secondary/higher	9	poorest	-87575		no		yes	no	no	no	yes	no		yes, paid myself	yes, valid		yes	public/gov't	outpatient	national health insurance	no	yes	yes	yes	good	very easy	satisfied	satisfied	satisfied
234	27731 1	GH6	277	31	usual resident	1377	men_GDHS_14.dta	central urban	277	1202304		25-29	male		unexposed	central	urban	akan	christianity	secondary/higher	12	richest	107418		yes		yes	no	no	no	yes	no		yes, paid myself	yes, valid		yes	private	outpatient	national health insurance	no	yes	yes	yes	very good	easy	satisfied	satisfied	satisfied
235	280 4 1	GH6	280	4	usual resident	1378	men_GDHS_14.dta	northern rural	280	566607		25-29	male		unexposed	northern	rural	mole_dagbani	islam	none	0	poorest	-134677		no		yes	no	no	no	yes	no		yes, paid myself	yes, valid		yes	public/gov't	outpatient	national health insurance	no	no	yes	no	good	fairly easy	not satisfied	satisfied
236	28116 1	GH6	281	16	usual resident	1377	men_GDHS_14.dta	western rural	281	422416		35-39	male		unexposed	western	rural	akan	christianity	secondary/higher	9	poorer	-55546		no		yes	no	no	no	yes	no		yes, paid myself	yes, valid		yes	public/gov't	outpatient	combination of any of the above	yes	yes	no	yes	fair	easy	satisfied	satisfied	satisfied
237	28732 1	GH6	287	32	usual resident	1377	men_GDHS_14.dta	volta urban	287	730373		25-29	male		unexposed	volta	urban	other	christianity	secondary/higher	15	middle	8843		no		yes	no	no	no	yes	no		yes, paid myself	yes, valid		yes	public/gov't	outpatient	national health insurance	no	yes	yes	yes	very good	easy	satisfied	satisfied	fairly satisfied
238	288 8 1	GH6	288	8	usual resident	1377	men_GDHS_14.dta	eastern urban	288	804426		35-39	male		unexposed	eastern	urban	ewe	christianity	secondary/higher	11	richer	49034		no		yes	no	no	no	yes	no		yes, paid myself	yes, valid		yes	public/gov't	outpatient	national health insurance	no	yes	yes	yes	good	easy	fairly satisfied	fairly satisfied	fairly satisfied
239	28926 3	GH6	289	26	usual resident	1380	men_GDHS_14.dta	upper west rural	289	297386		25-29	male		unexposed	upper west	rural	mole_dagbani	christianity	secondary/higher	12	poorest	-74393		no		yes	no	no	no	yes	no		yes, paid myself	yes, valid		yes	public/gov't	outpatient	national health insurance	no	yes	yes	yes	very good	easy	very satisfied	satisfied	very satisfied
240	28930 1	GH6	289	30	usual resident	1380	men_GDHS_14.dta	upper west rural	289	297386		over44	male		unexposed	upper west	rural	mole_dagbani	other	none	0	poorest	-138274		no		yes	no	no	no	yes	no		yes, paid myself	yes, valid		yes	public/gov't	outpatient	national health insurance	no	yes	yes	yes	very good	easy	very satisfied	very satisfied	very satisfied
241	290 3 1	GH6	290	3	usual resident	1379	men_GDHS_14.dta	ashanti rural	290	1990816		30-34	male		exposed	ashanti	rural	akan	christianity	secondary/higher	15	middle	-8234		no		yes	no	no	no	yes	no		yes, paid myself	yes, valid		yes	public/gov't	outpatient	national health insurance	no	yes	yes	yes	good	fairly easy	not satisfied	fairly satisfied	fairly satisfied
242	29017 1	GH6	290	17	usual resident	1379	men_GDHS_14.dta	ashanti rural	290	1990816		over44	male		exposed	ashanti	rural	akan	christianity	secondary/higher	7	poorer	-26540		yes		yes	no	no	no	yes	no		yes, paid myself	yes, valid		yes	public/gov't	outpatient	national health insurance	no	yes	yes	yes	good	difficult	not satisfied	fairly satisfied	fairly satisfied
243	29118 1	GH6	291	18	usual resident	1379	men_GDHS_14.dta	western urban	291	608203		35-39	male		unexposed	western	urban	ewe	christianity	secondary/higher	15	richest	151632		no		yes	no	no	no	yes	no		yes, paid myself	yes, valid		yes	public/gov't	outpatient	national health insurance	no	no	no	no	very good	easy	very satisfied	satisfied
244	29132 2	GH6	291	32	usual resident	1379	men_GDHS_14.dta	western urban	291	608203		15-19	male		unexposed	western	urban	akan	islam	secondary/higher	8	richest	135800		no		yes	no	no	no	yes	no		yes, paid by a relative / friend	yes, valid		yes	public/gov't	outpatient	national health insurance	no	yes	no	no	very good	easy	not satisfied	satisfied
245	298 2 1	GH6	298	2	usual resident	1379	men_GDHS_14.dta	northern urban	298	931811		35-39	male		unexposed	northern	urban	mole_dagbani	islam	secondary/higher	15	richer	48515		no		yes	no	no	no	yes	no		yes, paid myself	yes, valid		yes	public/gov't	outpatient	national health insurance	no	yes	yes	yes	good	easy	satisfied
246	29819 1	GH6	298	19	usual resident	1379	men_GDHS_14.dta	northern urban	298	931811		25-29	male		unexposed	northern	urban	other	christianity	secondary/higher	12	middle	-6402		no		yes	no	no	no	yes	no		yes, paid myself	yes, valid		yes	private	outpatient	combination of any of the above	yes	yes	yes	yes	fair	fairly easy	satisfied	satisfied
247	29829 4	GH6	298	29	usual resident	1379	men_GDHS_14.dta	northern urban	298	931811		15-19	male		unexposed	northern	urban	other	christianity	secondary/higher	9	poorest	-91591		no		yes	no	no	no	yes	no		yes, paid by a relative / friend	yes, valid		yes	public/gov't	outpatient	combination of any of the above	yes	yes	yes	yes	good	easy	satisfied	satisfied
248	30330 1	GH6	303	30	usual resident	1379	men_GDHS_14.dta	upper east urban	303	165630		35-39	male		unexposed	upper east	urban	mole_dagbani	christianity	secondary/higher	12	richer	34284		no		yes	no	no	no	yes	no		yes, paid myself	yes, valid		yes	private	outpatient	national health insurance	no	yes	yes	yes	very good	very difficult	very satisfied	satisfied	satisfied
249	30410 2	GH6	304	10	usual resident	1378	men_GDHS_14.dta	ashanti urban	304	1662544		25-29	male		exposed	ashanti	urban	akan	christianity	secondary/higher	16	richer	82828		yes		yes	no	no	no	yes	no		yes, paid myself	yes, valid		yes	private	outpatient	cash	yes	yes	yes	yes	good	very easy	satisfied	very satisfied	satisfied
250	30514 1	GH6	305	14	usual resident	1377	men_GDHS_14.dta	central urban	305	769153		over44	male		unexposed	central	urban	akan	christianity	secondary/higher	11	richer	65621		no		yes	no	no	no	yes	no		yes, paid by employer/ssnit	yes, valid		yes	public/gov't	outpatient	national health insurance	no	no	no	no	very good	difficult	not satisfied	not satisfied
251	306 4 1	GH6	306	4	usual resident	1377	men_GDHS_14.dta	ashanti urban	306	1674462		35-39	male		exposed	ashanti	urban	other	islam	secondary/higher	11	richer	85075		yes		yes	no	no	no	yes	no		yes, paid myself	yes, valid		yes	public/gov't	outpatient	cash	yes	yes	yes	yes	good	easy	very satisfied	very satisfied	very satisfied
252	30613 1	GH6	306	13	usual resident	1377	men_GDHS_14.dta	ashanti urban	306	1674462		20-24	male		exposed	ashanti	urban	other	islam	secondary/higher	9	richer	72640		yes		yes	no	no	no	yes	no		yes, paid by a relative / friend	yes, valid		yes	public/gov't	outpatient	cash	yes	yes	yes	yes	good	very easy	satisfied	satisfied	very satisfied
253	308 1 1	GH6	308	1	usual resident	1379	men_GDHS_14.dta	central rural	308	980637		40-44	male		unexposed	central	rural	akan	christianity	primary education	6	middle	2212		no		yes	no	no	no	yes	no		yes, paid myself	yes, valid		yes	public/gov't	outpatient	national health insurance	no	yes	yes	yes	good	very easy	satisfied	satisfied	fairly satisfied
254	30813 1	GH6	308	13	usual resident	1380	men_GDHS_14.dta	central rural	308	980637		over44	male		unexposed	central	rural	akan	christianity	secondary/higher	10	middle	-14075		no		yes	no	no	no	yes	no		yes, paid by a relative / friend	yes, valid		yes	public/gov't	outpatient	national health insurance	no	yes	yes	yes	very good	very easy	satisfied	satisfied	satisfied
255	31032 1	GH6	310	32	usual resident	1378	men_GDHS_14.dta	upper west rural	310	356219		35-39	male		unexposed	upper west	rural	other	islam	none	0	poorest	-91630		no		yes	no	no	no	yes	no		yes, paid myself	yes, valid		yes	public/gov't	outpatient	national health insurance	no	yes	yes	yes	good	very easy	satisfied	satisfied	very satisfied
256	312 2 1	GH6	312	2	usual resident	1377	men_GDHS_14.dta	upper east rural	312	541424		over44	male		unexposed	upper east	rural	mole_dagbani	islam	none	0	poorest	-220327		no		yes	no	no	no	yes	no		yes, paid myself	yes, valid		yes	private	outpatient	national health insurance	no	yes	yes	yes	very good	easy	satisfied	satisfied	satisfied
257	312 7 1	GH6	312	7	usual resident	1377	men_GDHS_14.dta	upper east rural	312	541424		35-39	male		unexposed	upper east	rural	mole_dagbani	christianity	secondary/higher	12	poorest	-203265		yes		yes	no	no	no	yes	no		yes, paid myself	yes, valid		yes	private	outpatient	national health insurance	no	yes	yes	yes	good	difficult	satisfied	satisfied	satisfied
258	31424 3	GH6	314	24	usual resident	1379	men_GDHS_14.dta	upper west rural	314	333378		15-19	male		unexposed	upper west	rural	mole_dagbani	islam	secondary/higher	8	middle	-6734		no		yes	no	no	no	yes	no		yes, paid by a relative / friend	yes, valid		yes	private	outpatient	cash	yes	yes	yes	yes	very good	very easy	satisfied	satisfied	satisfied
259	31511 1	GH6	315	11	usual resident	1379	men_GDHS_14.dta	western urban	315	1809762		30-34	male		unexposed	western	urban	akan	christianity	secondary/higher	9	richest	112373		no		yes	no	no	no	yes	no		yes, paid by a relative / friend	yes, valid		yes	public/gov't	outpatient	national health insurance	no	yes	yes	yes	fair	fairly easy	not satisfied	not satisfied
260	31515 1	GH6	315	15	usual resident	1380	men_GDHS_14.dta	western urban	315	1809762		30-34	male		unexposed	western	urban	akan	christianity	secondary/higher	14	richest	128268		no		yes	no	no	no	yes	no		yes, paid myself	yes, valid		yes	private	outpatient	national health insurance	no	yes	no	yes	very good	very easy	satisfied	very satisfied	satisfied
261	31526 1	GH6	315	26	usual resident	1379	men_GDHS_14.dta	western urban	315	1809762		over44	male		unexposed	western	urban	ewe	christianity	secondary/higher	16	richest	108210		no		yes	no	no	no	yes	no		yes, paid by employer/ssnit	yes, valid		yes	private	outpatient	national health insurance	no	yes	yes	yes	good	easy	fairly satisfied	satisfied
262	31528 1	GH6	315	28	usual resident	1379	men_GDHS_14.dta	western urban	315	1809762		30-34	male		unexposed	western	urban	other	christianity	secondary/higher	9	richest	114179		no		yes	no	no	no	yes	no		yes, paid myself	yes, valid		yes	private	outpatient	national health insurance	no	yes	yes	yes	good	fairly easy	fairly satisfied	fairly satisfied
263	31532 1	GH6	315	32	usual resident	1379	men_GDHS_14.dta	western urban	315	1809762		25-29	male		unexposed	western	urban	akan	other	secondary/higher	12	richer	86674		no		yes	no	no	no	yes	no		yes, paid by employer/ssnit	yes, valid		yes	private	outpatient	national health insurance	no	yes	no	yes	good	easy	not satisfied	not satisfied	not satisfied
264	31929 1	GH6	319	29	usual resident	1377	men_GDHS_14.dta	northern rural	319	1129511		35-39	male		unexposed	northern	rural	other	other	none	0	poorest	-132009		no		yes	no	no	no	yes	no		yes, paid myself	yes, valid		yes	public/gov't	outpatient	national health insurance	no	yes	no	yes	good	easy	satisfied	satisfied
265	320 9 1	GH6	320	9	usual resident	1379	men_GDHS_14.dta	brong ahafo rural	320	666501		over44	male		unexposed	brong ahafo	rural	other	other	none	0	poorest	-88380		no		yes	no	no	no	yes	no		yes, paid myself	yes, valid		yes	public/gov't	outpatient	national health insurance	no	yes	yes	yes	good	easy	satisfied	fairly satisfied	satisfied
266	32015 1	GH6	320	15	usual resident	1379	men_GDHS_14.dta	brong ahafo rural	320	666501		over44	male		unexposed	brong ahafo	rural	other	other	none	0	poorer	-71592		no		yes	no	no	no	yes	no		yes, paid myself	yes, valid		yes	public/gov't	outpatient	cash	yes	yes	yes	yes	good	easy	satisfied	very satisfied	satisfied
267	32022 1	GH6	320	22	usual resident	1379	men_GDHS_14.dta	brong ahafo rural	320	666501		35-39	male		unexposed	brong ahafo	rural	other	christianity	none	0	poorer	-68091		no		yes	no	no	no	yes	no		yes, paid myself	yes, valid		yes	public/gov't	outpatient	national health insurance	no	yes	yes	yes	good	easy	satisfied	very satisfied	satisfied
268	32210 1	GH6	322	10	usual resident	1379	men_GDHS_14.dta	central urban	322	926483		25-29	male		unexposed	central	urban	akan	christianity	secondary/higher	15	richest	144902		no		yes	no	no	no	yes	no		yes, paid myself	yes, valid		yes	private	outpatient	national health insurance	no	yes	yes	yes	very good	very easy	satisfied	satisfied	satisfied
269	32217 3	GH6	322	17	usual resident	1379	men_GDHS_14.dta	central urban	322	926483		15-19	male		unexposed	central	urban	akan	christianity	secondary/higher	8	richer	61146		no		yes	no	no	no	yes	no		yes, paid by a relative / friend	yes, valid		yes	public/gov't	outpatient	national health insurance	no	yes	yes	yes	very good	very easy	satisfied	satisfied	satisfied
270	323 9 3	GH6	323	9	usual resident	1377	men_GDHS_14.dta	upper east rural	323	369085		25-29	male		unexposed	upper east	rural	mole_dagbani	other	secondary/higher	12	poorest	-301712		no		yes	no	no	no	yes	no		yes, paid myself	yes, valid		yes	public/gov't	outpatient	national health insurance	no	yes	yes	yes	good	very easy	not satisfied	satisfied
271	324 8 1	GH6	324	8	usual resident	1379	men_GDHS_14.dta	volta rural	324	1054184		25-29	male		unexposed	volta	rural	ewe	christianity	secondary/higher	16	richer	60498		no		yes	no	no	no	yes	no		yes, paid myself	yes, valid		yes	public/gov't	outpatient	national health insurance	no	yes	no	yes	good	easy	not satisfied	satisfied	not satisfied
272	325 1 1	GH6	325	1	usual resident	1377	men_GDHS_14.dta	greater accra urban	325	1300262		over44	male		unexposed	greater accra	urban	other	islam	secondary/higher	10	richest	104840		yes		yes	no	no	no	yes	no		yes, paid myself	yes, valid		yes	private	outpatient	national health insurance	no	yes	yes	yes	very good	easy	very satisfied	very satisfied	very satisfied
273	32527 3	GH6	325	27	usual resident	1377	men_GDHS_14.dta	greater accra urban	325	1300262		20-24	male		unexposed	greater accra	urban	other	christianity	secondary/higher	12	richest	111272		no		yes	no	no	no	yes	no		yes, paid by a relative / friend	yes, valid		yes	private	outpatient	cash	yes	yes	yes	yes	good	fairly easy	not satisfied	satisfied	satisfied
274	327 4 4	GH6	327	4	usual resident	1380	men_GDHS_14.dta	volta rural	327	1133340		20-24	male		unexposed	volta	rural	ewe	christianity	secondary/higher	7	middle	-18140		no		yes	no	no	no	yes	no		yes, paid myself	yes, valid		yes	public/gov't	outpatient	national health insurance	no	yes	yes	yes	good	easy	satisfied	satisfied	satisfied
275	327 6 1	GH6	327	6	usual resident	1379	men_GDHS_14.dta	volta rural	327	1133340		40-44	male		unexposed	volta	rural	ewe	christianity	secondary/higher	16	poorer	-70253		no		yes	no	no	no	yes	no		yes, paid by employer/ssnit	yes, valid		yes	public/gov't	outpatient	national health insurance	no	yes	yes	yes	fair	easy	fairly satisfied	satisfied
276	327 7 3	GH6	327	7	usual resident	1379	men_GDHS_14.dta	volta rural	327	1133340		15-19	male		unexposed	volta	rural	ewe	christianity	secondary/higher	8	middle	21344		no		yes	no	no	no	yes	no		yes, paid by a relative / friend	yes, valid		yes	public/gov't	outpatient	national health insurance	no	yes	yes	yes	good	easy	satisfied	satisfied	satisfied
277	32715 1	GH6	327	15	usual resident	1379	men_GDHS_14.dta	volta rural	327	1133340		40-44	male		unexposed	volta	rural	ewe	christianity	secondary/higher	16	richer	48288		no		yes	no	no	no	yes	no		yes, paid by employer/ssnit	yes, valid		yes	public/gov't	outpatient	national health insurance	no	no	yes	yes	good	easy	not satisfied	satisfied	satisfied
278	32815 1	GH6	328	15	usual resident	1378	men_GDHS_14.dta	brong ahafo urban	328	569709		35-39	male		unexposed	brong ahafo	urban	mole_dagbani	islam	secondary/higher	9	middle	72		no		yes	no	no	no	yes	no		yes, paid myself	yes, valid		yes	public/gov't	outpatient	national health insurance	no	yes	yes	yes	good	easy	satisfied	satisfied	fairly satisfied
279	32821 1	GH6	328	21	usual resident	1378	men_GDHS_14.dta	brong ahafo urban	328	569709		30-34	male		unexposed	brong ahafo	urban	mole_dagbani	islam	secondary/higher	12	richer	65632		no		yes	no	no	no	yes	no		yes, paid myself	yes, valid		yes	private	outpatient	national health insurance	no	yes	yes	yes	good	easy	not satisfied	fairly satisfied	fairly satisfied
280	33231 1	GH6	332	31	usual resident	1378	men_GDHS_14.dta	greater accra urban	332	4051785		35-39	male		unexposed	greater accra	urban	akan	christianity	secondary/higher	9	richest	197340		no		yes	no	no	no	yes	no		yes, paid myself	yes, valid		yes	private	outpatient	national health insurance	no	yes	yes	yes	good	very easy	very satisfied	very satisfied	very satisfied
281	333 4 1	GH6	333	4	usual resident	1379	men_GDHS_14.dta	western urban	333	872278		over44	male		unexposed	western	urban	akan	christianity	secondary/higher	10	middle	-14369		no		yes	no	no	no	yes	no		yes, paid myself	yes, valid		yes	public/gov't	outpatient	national health insurance	no	yes	yes	yes	good	very difficult	very dissatisfied	not satisfied	fairly satisfied
282	33311 1	GH6	333	11	usual resident	1379	men_GDHS_14.dta	western urban	333	872278		40-44	male		unexposed	western	urban	akan	christianity	secondary/higher	9	poorer	-38294		no		yes	no	no	no	yes	no		yes, paid by a relative / friend	yes, valid		yes	private	outpatient	national health insurance	no	no	no	yes	good	very easy	fairly satisfied	not satisfied
283	33316 1	GH6	333	16	usual resident	1379	men_GDHS_14.dta	western urban	333	872278		30-34	male		unexposed	western	urban	akan	christianity	secondary/higher	12	richest	137217		no		yes	no	no	no	yes	no		yes, paid myself	yes, valid		yes	private	outpatient	national health insurance	no	yes	no	yes	good	very easy	satisfied	satisfied	satisfied
284	33430 1	GH6	334	30	usual resident	1377	men_GDHS_14.dta	eastern rural	334	1319098		over44	male		unexposed	eastern	rural	other	christianity	secondary/higher	10	poorer	-26552		no		yes	no	no	no	yes	no		yes, paid myself	yes, valid		yes	public/gov't	outpatient	national health insurance	no	yes	yes	yes	very good	very easy	satisfied	satisfied	satisfied
285	33722 1	GH6	337	22	usual resident	1377	men_GDHS_14.dta	upper west rural	337	207429		25-29	male		unexposed	upper west	rural	mole_dagbani	christianity	primary education	5	poorest	-146005		no		yes	no	no	no	yes	no		yes, paid myself	yes, valid		yes	public/gov't	outpatient	national health insurance	no	yes	yes	yes	good	very easy	satisfied	satisfied
286	33831 1	GH6	338	31	usual resident	1377	men_GDHS_14.dta	greater accra urban	338	1736479		over44	male		unexposed	greater accra	urban	other	christianity	secondary/higher	10	richest	127662		no		yes	no	no	no	yes	no		yes, paid myself	yes, valid		yes	public/gov't	outpatient	national health insurance	no	yes	yes	yes	good	very easy	not satisfied	satisfied	not satisfied
287	340 2 2	GH6	340	2	usual resident	1378	men_GDHS_14.dta	volta rural	340	653403		30-34	male		unexposed	volta	rural	ewe	christianity	secondary/higher	12	middle	-15968		no		yes	no	no	no	yes	no		yes, paid myself	yes, valid		yes	public/gov't	outpatient	national health insurance	no	yes	yes	yes	good	very easy	satisfied	satisfied	satisfied
288	340 7 2	GH6	340	7	usual resident	1378	men_GDHS_14.dta	volta rural	340	653403		15-19	male		unexposed	volta	rural	ewe	christianity	secondary/higher	7	middle	-6299		no		yes	no	no	no	yes	no		yes, paid by a relative / friend	yes, valid		yes	public/gov't	outpatient	national health insurance	no	yes	yes	yes	good	very difficult	satisfied	satisfied	satisfied
289	34411 1	GH6	344	11	usual resident	1379	men_GDHS_14.dta	upper west rural	344	1201579		35-39	male		unexposed	upper west	rural	other	islam	none	0	middle	-12873		no		yes	no	no	no	yes	no		yes, paid myself	yes, valid		yes	private	outpatient	national health insurance	no	yes	yes	yes	very good	very easy	satisfied	very satisfied	satisfied
290	34729 4	GH6	347	29	usual resident	1378	men_GDHS_14.dta	upper west rural	347	211546		15-19	male		unexposed	upper west	rural	other	islam	secondary/higher	7	poorer	-67417		no		yes	no	no	no	yes	no		yes, paid by a relative / friend	yes, valid		yes	public/gov't	outpatient	national health insurance	no	no	yes	yes	good	easy	not satisfied	satisfied	not satisfied
291	34814 5	GH6	348	14	usual resident	1377	men_GDHS_14.dta	eastern urban	348	852394		15-19	male		unexposed	eastern	urban	akan	christianity	secondary/higher	8	richest	219818		no		yes	no	no	no	yes	no		yes, paid by a relative / friend	yes, valid		yes	private	outpatient	cash	yes	yes	no	yes	very good	easy	not satisfied	fairly satisfied	not satisfied
292	34932 1	GH6	349	32	usual resident	1380	men_GDHS_14.dta	central rural	349	839112		35-39	male		unexposed	central	rural	mole_dagbani	islam	secondary/higher	19	richer	69838		no		yes	no	no	no	yes	no		yes, paid by employer/ssnit	yes, valid		yes	public/gov't	outpatient	national health insurance	no	yes	yes	yes	very good	very easy	satisfied	satisfied	satisfied
293	352 7 2	GH6	352	7	usual resident	1377	men_GDHS_14.dta	ashanti rural	352	2032463		20-24	male		exposed	ashanti	rural	akan	christianity	secondary/higher	10	middle	-19665		no		yes	no	no	no	yes	no		yes, paid by a relative / friend	yes, valid		yes	private	outpatient	cash	yes	yes	no	yes	good	easy	not satisfied	satisfied	very satisfied
294	35412 1	GH6	354	12	usual resident	1379	men_GDHS_14.dta	greater accra urban	354	3522793		40-44	male		unexposed	greater accra	urban	ewe	christianity	secondary/higher	9	richest	107318		no		yes	no	no	no	yes	no		yes, paid by employer/ssnit	yes, valid		yes	private	outpatient	national health insurance	no	yes	yes	yes	very good	easy	satisfied	satisfied	satisfied
295	35418 1	GH6	354	18	usual resident	1379	men_GDHS_14.dta	greater accra urban	354	3522793		35-39	male		unexposed	greater accra	urban	other	christianity	secondary/higher	12	richest	109078		no		yes	no	no	no	yes	no		yes, paid myself	yes, valid		yes	private	outpatient	national health insurance	no	yes	yes	yes	very good	very easy	fairly satisfied	satisfied
296	355 2 3	GH6	355	2	usual resident	1377	men_GDHS_14.dta	upper east rural	355	592082		15-19	male		unexposed	upper east	rural	other	christianity	secondary/higher	8	poorest	-167829		no		yes	no	no	no	yes	no		yes, paid by a relative / friend	yes, valid		yes	public/gov't	outpatient	cash	yes	yes	yes	yes	good	difficult	satisfied	satisfied	satisfied
297	35515 3	GH6	355	15	usual resident	1377	men_GDHS_14.dta	upper east rural	355	592082		20-24	male		unexposed	upper east	rural	other	christianity	primary education	2	poorest	-168236		no		yes	no	no	no	yes	no		yes, paid by a relative / friend	yes, valid		yes	public/gov't	outpatient	national health insurance	no	yes	yes	yes	good	easy	very dissatisfied	fairly satisfied
298	35521 2	GH6	355	21	usual resident	1377	men_GDHS_14.dta	upper east rural	355	592082		over44	male		unexposed	upper east	rural	mole_dagbani	islam	none	0	poorest	-147381		no		yes	no	no	no	yes	no		yes, paid myself	yes, valid		yes	public/gov't	outpatient	national health insurance	no	yes	no	yes	good	very easy	not satisfied	fairly satisfied	not satisfied
299	357 3 2	GH6	357	3	usual resident	1378	men_GDHS_14.dta	brong ahafo rural	357	469799		15-19	male		unexposed	brong ahafo	rural	mole_dagbani	christianity	secondary/higher	7	poorest	-138306		no		yes	no	no	no	yes	no		yes, paid by a relative / friend	yes, valid		yes	public/gov't	outpatient	national health insurance	no	yes	yes	yes	good	very easy	satisfied	very satisfied	very satisfied
300	35712 1	GH6	357	12	usual resident	1378	men_GDHS_14.dta	brong ahafo rural	357	469799		over44	male		unexposed	brong ahafo	rural	ewe	christianity	secondary/higher	10	poorer	-50955		no		yes	no	no	no	yes	no		yes, paid myself	yes, valid		yes	public/gov't	outpatient	national health insurance	no	yes	yes	yes	good	easy	not satisfied	fairly satisfied	fairly satisfied
301	35721 1	GH6	357	21	usual resident	1378	men_GDHS_14.dta	brong ahafo rural	357	469799		over44	male		unexposed	brong ahafo	rural	akan	christianity	secondary/higher	10	poorest	-76779		yes		yes	no	no	no	yes	no		yes, paid myself	yes, valid		yes	public/gov't	outpatient	national health insurance	no	yes	yes	yes	good	easy	satisfied	satisfied	very satisfied
302	35733 1	GH6	357	33	usual resident	1378	men_GDHS_14.dta	brong ahafo rural	357	469799		over44	male		unexposed	brong ahafo	rural	akan	christianity	secondary/higher	8	poorest	-84785		no		yes	no	no	no	yes	no		yes, paid myself	yes, valid		yes	public/gov't	outpatient	national health insurance	no	yes	yes	yes	very good	easy	satisfied	satisfied	very satisfied
303	36326 1	GH6	363	26	usual resident	1379	men_GDHS_14.dta	central rural	363	773449		35-39	male		unexposed	central	rural	akan	other	secondary/higher	9	middle	-24771		no		yes	no	no	no	yes	no		yes, paid myself	yes, valid		yes	public/gov't	outpatient	national health insurance	no	yes	yes	yes	very good	very easy	satisfied	satisfied	satisfied
304	36433 1	GH6	364	33	usual resident	1378	men_GDHS_14.dta	eastern rural	364	1108077		20-24	male		unexposed	eastern	rural	other	christianity	secondary/higher	9	middle	-23102		no		yes	no	no	no	yes	no		yes, paid myself	yes, valid		yes	public/gov't	outpatient	national health insurance	no	yes	yes	yes	fair	easy	fairly satisfied	satisfied	satisfied
305	36510 3	GH6	365	10	usual resident	1377	men_GDHS_14.dta	eastern rural	365	512645		15-19	male		unexposed	eastern	rural	akan	islam	primary education	4	poorest	-94167		no		yes	no	no	no	yes	no		yes, paid by a relative / friend	yes, valid		yes	public/gov't	outpatient	national health insurance	no	no	yes	yes	very poor	easy	very dissatisfied	satisfied	satisfied
306	36717 1	GH6	367	17	usual resident	1378	men_GDHS_14.dta	upper east rural	367	214350		30-34	male		unexposed	upper east	rural	mole_dagbani	christianity	secondary/higher	13	poorest	-133852		no		yes	no	no	no	yes	no		yes, paid myself	yes, valid		yes	public/gov't	outpatient	national health insurance	no	yes	yes	yes	very good	very easy	very satisfied	satisfied
307	36810 1	GH6	368	10	usual resident	1378	men_GDHS_14.dta	upper east urban	368	437825		over44	male		unexposed	upper east	urban	mole_dagbani	islam	none	0	poorer	-71546		no		yes	no	no	no	yes	no		yes, paid myself	yes, valid		yes	public/gov't	outpatient	national health insurance	no	yes	yes	yes	good	easy	fairly satisfied	satisfied	satisfied
308	36813 3	GH6	368	13	usual resident	1378	men_GDHS_14.dta	upper east urban	368	437825		20-24	male		unexposed	upper east	urban	other	islam	secondary/higher	13	richer	60914		no		yes	no	no	no	yes	no		yes, paid by a relative / friend	yes, valid		yes	private	outpatient	national health insurance	no	yes	yes	yes	good	easy	satisfied	satisfied
309	36813 5	GH6	368	13	usual resident	1378	men_GDHS_14.dta	upper east urban	368	437825		15-19	male		unexposed	upper east	urban	other	islam	secondary/higher	9	richer	60914		no		yes	no	no	no	yes	no		yes, paid by a relative / friend	yes, valid		yes	private	outpatient	national health insurance	no	no	yes	yes	good	easy	satisfied	not satisfied
310	36831 1	GH6	368	31	usual resident	1378	men_GDHS_14.dta	upper east urban	368	437825		over44	male		unexposed	upper east	urban	other	islam	none	0	middle	-8087		yes		yes	no	no	no	yes	no		yes, paid by a relative / friend	yes, valid		yes	public/gov't	outpatient	national health insurance	no	yes	yes	yes	good	easy	satisfied	satisfied
311	369 8 1	GH6	369	8	usual resident	1378	men_GDHS_14.dta	volta urban	369	996719		20-24	male		unexposed	volta	urban	ewe	christianity	secondary/higher	13	richest	132919		no		yes	no	no	no	yes	no		yes, paid myself	yes, valid		yes	public/gov't	outpatient	cash	yes	no	no	yes	poor	difficult	very dissatisfied	fairly satisfied	fairly satisfied
312	37023 5	GH6	370	23	visitor	1379	men_GDHS_14.dta	ashanti rural	370	1234409		35-39	male		exposed	ashanti	rural	akan	christianity	secondary/higher	9	middle	-14768		no		yes	no	no	no	yes	no		yes, paid myself	yes, valid		yes	public/gov't	outpatient	national health insurance	no	yes	yes	yes	good	easy	satisfied
313	37127 1	GH6	371	27	usual resident	1377	men_GDHS_14.dta	western urban	371	645967		35-39	male		unexposed	western	urban	akan	christianity	secondary/higher	15	richest	127612		yes		yes	no	no	no	yes	no		yes, paid by employer/ssnit	yes, valid		yes	public/gov't	outpatient	cash	yes	yes	yes	yes	good	difficult	not satisfied	satisfied	satisfied
314	37221 1	GH6	372	21	usual resident	1378	men_GDHS_14.dta	eastern rural	372	978929		over44	male		unexposed	eastern	rural	akan	christianity	secondary/higher	10	poorer	-63530		no		yes	no	no	no	yes	no		yes, paid by employer/ssnit	yes, valid		yes	public/gov't	outpatient	combination of any of the above	yes	yes	yes	yes	good	fairly easy	satisfied	satisfied	not satisfied
315	37221 3	GH6	372	21	usual resident	1378	men_GDHS_14.dta	eastern rural	372	978929		15-19	male		unexposed	eastern	rural	akan	christianity	secondary/higher	10	poorer	-63530		no		yes	no	no	no	yes	no		yes, paid by a relative / friend	yes, valid		yes	private	outpatient	national health insurance	no	yes	no	yes	good	easy	satisfied	satisfied	satisfied
316	373 2 1	GH6	373	2	usual resident	1378	men_GDHS_14.dta	greater accra urban	373	1285268		over44	male		unexposed	greater accra	urban	other	christianity	secondary/higher	9	richer	58879		yes		yes	no	no	no	yes	no		yes, paid myself	yes, valid		yes	public/gov't	outpatient	national health insurance	no	yes	yes	yes	very good	fairly easy	not satisfied	satisfied	fairly satisfied
317	373 4 1	GH6	373	4	usual resident	1378	men_GDHS_14.dta	greater accra urban	373	1285268		40-44	male		unexposed	greater accra	urban	other	christianity	secondary/higher	12	richest	114834		no		yes	no	no	no	yes	no		yes, paid myself	yes, valid		yes	private	outpatient	cash	yes	yes	no	yes	fair	very easy	very satisfied	satisfied	satisfied
318	37426 2	GH6	374	26	usual resident	1379	men_GDHS_14.dta	western rural	374	1139887		30-34	male		unexposed	western	rural	akan	christianity	secondary/higher	14	middle	-11348		no		yes	no	no	no	yes	no		yes, paid myself	yes, valid		yes	public/gov't	outpatient	national health insurance	no	yes	no	no	good	easy	satisfied	satisfied
319	37429 2	GH6	374	29	usual resident	1379	men_GDHS_14.dta	western rural	374	1139887		15-19	male		unexposed	western	rural	akan	christianity	secondary/higher	9	poorer	-63639		no		yes	no	no	no	yes	no		yes, paid by a relative / friend	yes, valid		yes	public/gov't	outpatient	national health insurance	no	yes	yes	yes	good	easy	very satisfied	satisfied
320	377 8 1	GH6	377	8	usual resident	1379	men_GDHS_14.dta	brong ahafo rural	377	1125646		over44	male		unexposed	brong ahafo	rural	ewe	christianity	none	0	poorest	-87635		no		yes	no	no	no	yes	no		yes, paid myself	yes, valid		yes	public/gov't	outpatient	cash	yes	yes	yes	yes	good	easy	satisfied	fairly satisfied	satisfied
321	37716 1	GH6	377	16	usual resident	1379	men_GDHS_14.dta	brong ahafo rural	377	1125646		30-34	male		unexposed	brong ahafo	rural	akan	christianity	secondary/higher	9	poorest	-91710		no		yes	no	no	no	yes	no		yes, paid myself	yes, valid		yes	private	outpatient	cash	yes	yes	yes	yes	good	easy	satisfied	fairly satisfied	satisfied
322	37914 6	GH6	379	14	visitor	1378	men_GDHS_14.dta	greater accra urban	379	911222		35-39	male		unexposed	greater accra	urban	other	christianity	secondary/higher	16	richest	204788		yes		yes	no	no	no	yes	no		yes, paid myself	yes, valid		yes	public/gov't	outpatient	national health insurance	no	yes	yes	yes	very good	very easy	fairly satisfied	fairly satisfied	not satisfied
323	385 9 1	GH6	385	9	usual resident	1379	men_GDHS_14.dta	ashanti rural	385	2413831		40-44	male		exposed	ashanti	rural	akan	christianity	secondary/higher	10	middle	30272		no		yes	no	no	no	yes	no		yes, paid myself	yes, valid		yes	private	outpatient	national health insurance	no	no	yes	yes	good	fairly easy	not satisfied	satisfied	satisfied
324	38627 1	GH6	386	27	usual resident	1377	men_GDHS_14.dta	ashanti rural	386	2057025		over44	male		exposed	ashanti	rural	akan	christianity	secondary/higher	8	richer	49160		yes		yes	no	no	no	yes	no		yes, paid myself	yes, valid		yes	public/gov't	outpatient	national health insurance	no	yes	yes	yes	very good	very easy	satisfied	satisfied	satisfied
325	38716 1	GH6	387	16	usual resident	1377	men_GDHS_14.dta	central urban	387	409708		25-29	male		unexposed	central	urban	akan	christianity	secondary/higher	9	richer	83014		no		yes	no	no	no	yes	no		yes, paid myself	yes, valid		yes	public/gov't	outpatient	national health insurance	no	yes	yes	yes	good	very easy	satisfied	fairly satisfied	satisfied
326	38813 1	GH6	388	13	usual resident	1377	men_GDHS_14.dta	central urban	388	1272936		35-39	male		unexposed	central	urban	akan	christianity	secondary/higher	16	richest	178271		no		yes	no	no	no	yes	no		yes, paid by employer/ssnit	yes, valid		yes	private	outpatient	cash	yes	yes	yes	yes	very good	very easy	very satisfied	very satisfied	very satisfied
327	391 9 1	GH6	391	9	usual resident	1377	men_GDHS_14.dta	upper west urban	391	243688		25-29	male		unexposed	upper west	urban	mole_dagbani	islam	secondary/higher	10	middle	21266		no		yes	no	no	no	yes	no		yes, paid myself	yes, valid		yes	public/gov't	outpatient	national health insurance	no	yes	no	no	very good	difficult	not satisfied	very satisfied	very satisfied
328	39122 1	GH6	391	22	usual resident	1377	men_GDHS_14.dta	upper west urban	391	243688		40-44	male		unexposed	upper west	urban	mole_dagbani	islam	secondary/higher	9	richer	74462		no		yes	no	no	no	yes	no		yes, paid myself	yes, valid		yes	public/gov't	outpatient	national health insurance	no	yes	yes	yes	good	difficult	satisfied	satisfied	very satisfied
329	39123 1	GH6	391	23	usual resident	1377	men_GDHS_14.dta	upper west urban	391	243688		40-44	male		unexposed	upper west	urban	mole_dagbani	islam	secondary/higher	16	richest	100794		no		yes	no	no	no	yes	no		yes, paid myself	yes, valid		yes	public/gov't	outpatient	national health insurance	no	yes	yes	no	good	very easy	satisfied	very satisfied	satisfied
330	39232 3	GH6	392	32	usual resident	1377	men_GDHS_14.dta	upper west urban	392	131068		20-24	male		unexposed	upper west	urban	other	christianity	secondary/higher	12	richest	107412		no		yes	no	no	no	yes	no		yes, paid by a relative / friend	yes, valid		yes	public/gov't	outpatient	national health insurance	no	yes	yes	yes	good	easy	satisfied	satisfied	satisfied
331	394 3 1	GH6	394	3	usual resident	1379	men_GDHS_14.dta	western rural	394	892122		over44	male		unexposed	western	rural	akan	christianity	secondary/higher	15	middle	1488		no		yes	no	no	no	yes	no		yes, paid myself	yes, valid		yes	public/gov't	outpatient	national health insurance	no	yes	yes	yes	good	easy	satisfied	satisfied	satisfied
332	394 3 3	GH6	394	3	usual resident	1379	men_GDHS_14.dta	western rural	394	892122		15-19	male		unexposed	western	rural	akan	christianity	secondary/higher	11	middle	1488		no		yes	no	no	no	yes	no		yes, paid by a relative / friend	yes, valid		yes	public/gov't	outpatient	combination of any of the above	yes	yes	yes	yes	good	easy	satisfied	satisfied	satisfied
333	39416 1	GH6	394	16	usual resident	1379	men_GDHS_14.dta	western rural	394	892122		40-44	male		unexposed	western	rural	akan	christianity	secondary/higher	8	middle	-14171		no		yes	no	no	no	yes	no		yes, paid myself	yes, valid		yes	private	outpatient	national health insurance	no	yes	yes	yes	very good	very easy	satisfied	satisfied	satisfied
334	39423 1	GH6	394	23	usual resident	1378	men_GDHS_14.dta	western rural	394	892122		over44	male		unexposed	western	rural	akan	christianity	secondary/higher	11	middle	6532		yes		yes	no	no	no	yes	no		yes, paid myself	yes, valid		yes	private	outpatient	national health insurance	no	yes	yes	yes	very good	very easy	satisfied	satisfied	satisfied
335	397 7 1	GH6	397	7	usual resident	1378	men_GDHS_14.dta	volta urban	397	928884		over44	male		unexposed	volta	urban	ewe	christianity	secondary/higher	10	richer	53031		yes		yes	no	no	no	yes	no		yes, paid myself	yes, valid		yes	private	outpatient	cash	yes	no	yes	no	very poor	difficult	very dissatisfied	very dissatisfied	satisfied
336	39925 1	GH6	399	25	usual resident	1380	men_GDHS_14.dta	volta rural	399	1770352		35-39	male		unexposed	volta	rural	ewe	christianity	secondary/higher	9	middle	16874		no		yes	no	no	no	yes	no		yes, paid myself	yes, valid		yes	public/gov't	outpatient	national health insurance	no	yes	yes	yes	good	easy	satisfied	satisfied	satisfied
337	401 6 1	GH6	401	6	usual resident	1378	men_GDHS_14.dta	brong ahafo urban	401	814831		30-34	male		unexposed	brong ahafo	urban	mole_dagbani	christianity	secondary/higher	9	richer	62335		no		yes	no	no	no	yes	no		yes, paid myself	yes, valid		yes	private	outpatient	cash	yes	yes	yes	yes	good	easy	satisfied	satisfied	satisfied
338	40117 1	GH6	401	17	usual resident	1378	men_GDHS_14.dta	brong ahafo urban	401	814831		over44	male		unexposed	brong ahafo	urban	other	islam	none	0	middle	-3653		no		yes	no	no	no	yes	no		yes, paid myself	yes, valid		yes	public/gov't	outpatient	national health insurance	no	yes	yes	yes	good	very easy	satisfied	satisfied	satisfied
339	40219 1	GH6	402	19	usual resident	1379	men_GDHS_14.dta	upper east urban	402	272312		25-29	male		unexposed	upper east	urban	mole_dagbani	islam	secondary/higher	15	richest	96351		no		yes	no	no	no	yes	no		yes, paid myself	yes, valid		yes	private	outpatient	national health insurance	no	yes	no	yes	poor	easy	not satisfied	satisfied
340	40325 1	GH6	403	25	usual resident	1377	men_GDHS_14.dta	eastern rural	403	805351		30-34	male		unexposed	eastern	rural	akan	christianity	secondary/higher	12	middle	743		no		yes	no	no	no	yes	no		yes, paid myself	yes, valid		yes	public/gov't	outpatient	national health insurance	no	yes	no	yes	very good	very easy	satisfied	satisfied	not satisfied
341	40628 1	GH6	406	28	usual resident	1379	men_GDHS_14.dta	northern rural	406	3296952		30-34	male		unexposed	northern	rural	mole_dagbani	islam	secondary/higher	16	middle	20761		no		yes	no	no	no	yes	no		yes, paid myself	yes, valid		yes	private	outpatient	cash	yes	yes	yes	yes	good	easy	fairly satisfied	fairly satisfied	fairly satisfied
342	409 2 4	GH6	409	2	usual resident	1378	men_GDHS_14.dta	volta rural	409	1049303		20-24	male		unexposed	volta	rural	ewe	christianity	secondary/higher	12	richer	69264		no		yes	no	no	no	yes	no		yes, paid by a relative / friend	yes, valid		yes	public/gov't	outpatient	cash	yes	no	yes	yes	very good	very easy	not satisfied	satisfied	satisfied
343	40923 1	GH6	409	23	usual resident	1378	men_GDHS_14.dta	volta rural	409	1049303		25-29	male		unexposed	volta	rural	ewe	christianity	primary education	4	middle	2168		no		yes	no	no	no	yes	no		yes, paid myself	yes, valid		yes	private	outpatient	national health insurance	no	yes	yes	yes	very good	very easy	satisfied	satisfied	satisfied
344	41114 1	GH6	411	14	usual resident	1378	men_GDHS_14.dta	eastern urban	411	663723		25-29	male		unexposed	eastern	urban	ewe	christianity	secondary/higher	13	richest	129711		no		yes	no	no	no	yes	no		yes, paid myself	yes, valid		yes	public/gov't	outpatient	cash	yes	no	yes	no	good	difficult	not satisfied	not satisfied
345	41120 2	GH6	411	20	usual resident	1378	men_GDHS_14.dta	eastern urban	411	663723		over44	male		unexposed	eastern	urban	akan	christianity	secondary/higher	10	richest	108923		no		yes	no	no	no	yes	no		yes, paid myself	yes, valid		yes	public/gov't	outpatient	national health insurance	no	yes	yes	yes	very good	easy	fairly satisfied	satisfied	satisfied
346	412 3 1	GH6	412	3	usual resident	1378	men_GDHS_14.dta	volta urban	412	773136		25-29	male		unexposed	volta	urban	ewe	christianity	secondary/higher	16	richest	186856		no		yes	no	no	no	yes	no		yes, paid myself	yes, valid		yes	private	outpatient	national health insurance	no	yes	yes	yes	very good	very easy	very satisfied	fairly satisfied	satisfied
347	412 5 1	GH6	412	5	usual resident	1378	men_GDHS_14.dta	volta urban	412	773136		over44	male		unexposed	volta	urban	akan	christianity	secondary/higher	10	richest	111538		no		yes	no	no	no	yes	no		yes, paid myself	yes, valid		yes	private	outpatient	national health insurance	no	yes	yes	yes	very good	very easy	satisfied	satisfied	satisfied
348	41316 4	GH6	413	16	usual resident	1379	men_GDHS_14.dta	upper west rural	413	227572		15-19	male		unexposed	upper west	rural	mole_dagbani	christianity	primary education	6	poorest	-110306		no		yes	no	no	no	yes	no		yes, paid by a relative / friend	yes, valid		yes	public/gov't	outpatient	national health insurance	no	yes	yes	yes	very good	easy	satisfied	satisfied	fairly satisfied
349	41523 1	GH6	415	23	usual resident	1379	men_GDHS_14.dta	upper west rural	415	343387		over44	male		unexposed	upper west	rural	mole_dagbani	other	none	0	poorest	-175739		no		yes	no	no	no	yes	no		yes, paid myself	yes, valid		yes	public/gov't	outpatient	national health insurance	no	yes	yes	yes	good	easy	satisfied	satisfied	satisfied
350	416 5 1	GH6	416	5	usual resident	1377	men_GDHS_14.dta	brong ahafo urban	416	581831		25-29	male		unexposed	brong ahafo	urban	akan	christianity	secondary/higher	15	richest	126288		no		yes	no	no	no	yes	no		yes, paid by employer/ssnit	yes, valid		yes	public/gov't	outpatient	cash	yes	yes	yes	yes	good	fairly easy	satisfied	fairly satisfied	fairly satisfied
351	418 1 9	GH6	418	1	usual resident	1378	men_GDHS_14.dta	brong ahafo urban	418	519337		15-19	male		unexposed	brong ahafo	urban	mole_dagbani	islam	primary education	5	middle	22471		no		yes	no	no	no	yes	no		yes, paid by a relative / friend	yes, valid		yes	public/gov't	outpatient	national health insurance	no	yes	yes	yes	good	easy	satisfied	fairly satisfied	satisfied
352	41821 4	GH6	418	21	usual resident	1378	men_GDHS_14.dta	brong ahafo urban	418	519337		15-19	male		unexposed	brong ahafo	urban	mole_dagbani	christianity	secondary/higher	9	poorest	-130745		no		yes	no	no	no	yes	no		yes, paid by a relative / friend	yes, valid		yes	private	outpatient	national health insurance	no	yes	yes	yes	very good	very easy	satisfied	fairly satisfied	satisfied
353	41928 2	GH6	419	28	usual resident	1377	men_GDHS_14.dta	ashanti rural	419	3358504		15-19	male		exposed	ashanti	rural	other	islam	secondary/higher	8	poorer	-33311		no		yes	no	no	no	yes	no		yes, paid by a relative / friend	yes, valid		yes	private	outpatient	national health insurance	no	yes	yes	yes	good	easy	satisfied	satisfied	satisfied
354	42118 1	GH6	421	18	usual resident	1377	men_GDHS_14.dta	ashanti urban	421	1466316		25-29	male		exposed	ashanti	urban	akan	christianity	secondary/higher	13	richest	144482		no		yes	no	no	no	yes	no		yes, paid myself	yes, valid		yes	public/gov't	outpatient	national health insurance	no	yes	yes	yes	good	easy	fairly satisfied	fairly satisfied	fairly satisfied
355	422 3 1	GH6	422	3	usual resident	1377	men_GDHS_14.dta	upper west rural	422	322293		35-39	male		unexposed	upper west	rural	other	islam	secondary/higher	12	poorest	-104796		no		yes	no	no	no	yes	no		yes, paid myself	yes, valid		yes	public/gov't	outpatient	national health insurance	no	yes	yes	yes	very good	very easy	very satisfied	satisfied	very satisfied
356	42216 1	GH6	422	16	usual resident	1377	men_GDHS_14.dta	upper west rural	422	322293		25-29	male		unexposed	upper west	rural	other	islam	primary education	1	poorer	-59986		no		yes	no	no	no	yes	no		yes, paid myself	yes, valid		yes	public/gov't	outpatient	national health insurance	no	no	no	yes	fair	fairly easy	fairly satisfied	satisfied	not satisfied
357	42224 1	GH6	422	24	usual resident	1377	men_GDHS_14.dta	upper west rural	422	322293		35-39	male		unexposed	upper west	rural	other	islam	none	0	poorer	-68998		no		yes	no	no	no	yes	no		yes, paid myself	yes, valid		yes	public/gov't	outpatient	national health insurance	no	yes	no	no	very good	easy	satisfied	satisfied	satisfied
358	42413 1	GH6	424	13	usual resident	1378	men_GDHS_14.dta	volta rural	424	1197656		over44	male		unexposed	volta	rural	ewe	christianity	secondary/higher	12	poorer	-65269		no		yes	no	no	no	yes	no		yes, paid myself	yes, valid		yes	public/gov't	outpatient	national health insurance	no	yes	yes	yes	good	very easy	satisfied	satisfied	satisfied
359	42416 1	GH6	424	16	usual resident	1379	men_GDHS_14.dta	volta rural	424	1197656		40-44	male		unexposed	volta	rural	ewe	christianity	secondary/higher	13	middle	-10061		no		yes	no	no	no	yes	no		yes, paid myself	yes, valid		yes	private	outpatient	cash	yes	yes	yes	yes	very good	difficult	very satisfied	very satisfied	very satisfied
360	42422 1	GH6	424	22	usual resident	1378	men_GDHS_14.dta	volta rural	424	1197656		30-34	male		unexposed	volta	rural	ewe	christianity	secondary/higher	12	richer	64419		no		yes	no	no	no	yes	no		yes, paid myself	yes, valid		yes	private	outpatient	national health insurance	no	no	yes	yes	very good	very easy	not satisfied	satisfied	satisfied
361	42629 4	GH6	426	29	usual resident	1377	men_GDHS_14.dta	upper west urban	426	263924		20-24	male		unexposed	upper west	urban	mole_dagbani	islam	secondary/higher	12	middle	1327		no		yes	no	no	no	yes	no		yes, paid myself	yes, valid		yes	public/gov't	outpatient	national health insurance	no	yes	yes	yes	good	very easy	satisfied	very satisfied	satisfied
362	1 9 2	GH6	1	9	usual resident	1378	women_GDHS_14.dta	western rural	1	858896		25-29	female		unexposed	western	rural	mole_dagbani	christianity	none	0	middle	8150		no		yes	no	no	no	yes	no		yes, paid by a relative / friend	yes, valid		yes	public/gov't	outpatient	national health insurance	no	yes	yes	yes	good	easy	satisfied	satisfied	satisfied
363	115 2	GH6	1	15	usual resident	1378	women_GDHS_14.dta	western rural	1	858896		20-24	female		unexposed	western	rural	akan	christianity	primary education	5	richer	47595		no		yes	no	no	no	yes	no		yes, paid by a relative / friend	yes, valid		yes	public/gov't	outpatient	national health insurance	no	yes	yes	yes	good	easy	satisfied	satisfied	satisfied
364	214 1	GH6	2	14	usual resident	1379	women_GDHS_14.dta	eastern rural	2	1118182		20-24	female		unexposed	eastern	rural	akan	christianity	secondary/higher	9	poorer	-42225		no		yes	no	no	no	yes	no		8	yes, valid		yes	private	outpatient	national health insurance	no	yes	yes	yes	good	very easy	not satisfied	satisfied	not satisfied
365	225 2	GH6	2	25	usual resident	1379	women_GDHS_14.dta	eastern rural	2	1118182		25-29	female		unexposed	eastern	rural	akan	christianity	none	0	poorer	-70961		no		yes	no	no	no	yes	no		yes, paid by a relative / friend	yes, valid		yes	public/gov't	outpatient	national health insurance	no	yes	yes	yes	very good	very easy	very dissatisfied	satisfied	very dissatisfied
366	230 4	GH6	2	30	usual resident	1379	women_GDHS_14.dta	eastern rural	2	1118182		20-24	female		unexposed	eastern	rural	other	christianity	secondary/higher	12	middle	21455		no		yes	no	no	no	yes	no		8	yes, valid		yes	public/gov't	outpatient	national health insurance	no	yes	no	yes	good	easy	satisfied	satisfied
367	312 2	GH6	3	12	usual resident	1379	women_GDHS_14.dta	ashanti urban	3	1922358		40-44	female		exposed	ashanti	urban	akan	christianity	primary education	5	richest	126581		yes		yes	no	no	no	yes	no		yes, paid by a relative / friend	yes, valid		yes	public/gov't	outpatient	combination of any of the above	yes	yes	yes	yes	very good	very easy	very satisfied	very satisfied	very satisfied
368	322 1	GH6	3	22	usual resident	1379	women_GDHS_14.dta	ashanti urban	3	1922358		40-44	female		exposed	ashanti	urban	akan	christianity	secondary/higher	10	richest	143579		no		yes	no	no	no	yes	no		yes, paid myself	yes, valid		yes	private	outpatient	combination of any of the above	yes	yes	yes	yes	fair	easy	fairly satisfied	fairly satisfied	fairly satisfied
369	4 6 2	GH6	4	6	usual resident	1377	women_GDHS_14.dta	central urban	4	685900		40-44	female		unexposed	central	urban	other	christianity	none	0	middle	-18055		no		yes	no	no	no	yes	no		yes, paid by a relative / friend	yes, valid		yes	public/gov't	outpatient	national health insurance	no	yes	yes	yes	very good	easy	satisfied	very satisfied	very satisfied
370	413 2	GH6	4	13	usual resident	1377	women_GDHS_14.dta	central urban	4	685900		30-34	female		unexposed	central	urban	mole_dagbani	islam	secondary/higher	9	richer	75175		no		yes	no	no	no	yes	no		yes, paid by a relative / friend	yes, valid		yes	public/gov't	outpatient	national health insurance	no	no	yes	no	very good	easy	very satisfied	satisfied	satisfied
371	421 2	GH6	4	21	usual resident	1377	women_GDHS_14.dta	central urban	4	685900		20-24	female		unexposed	central	urban	mole_dagbani	islam	secondary/higher	13	middle	18460		no		yes	no	no	no	yes	no		no, other	yes, valid		yes	public/gov't	outpatient	national health insurance	no	yes	yes	yes	fair	fairly easy	not satisfied	very satisfied
372	432 3	GH6	4	32	usual resident	1377	women_GDHS_14.dta	central urban	4	685900		15-19	female		unexposed	central	urban	akan	christianity	secondary/higher	8	richest	127481		no		yes	no	no	no	yes	no		no, exempt as indigent	yes, valid		yes	private	outpatient	national health insurance	no	yes	yes	yes	good	fairly easy	not satisfied	satisfied	fairly satisfied
373	5 4 2	GH6	5	4	usual resident	1380	women_GDHS_14.dta	northern rural	5	401436		30-34	female		unexposed	northern	rural	other	christianity	primary education	4	poorest	-264492		no		yes	no	no	no	yes	no		yes, paid myself	yes, valid		yes	public/gov't	outpatient	national health insurance	no	yes	yes	yes	poor	very easy	fairly satisfied	very satisfied	satisfied
374	5 6 2	GH6	5	6	usual resident	1380	women_GDHS_14.dta	northern rural	5	401436		25-29	female		unexposed	northern	rural	other	christianity	primary education	6	poorest	-107384		no		yes	no	no	no	yes	no		yes, paid by a relative / friend	yes, valid		yes	public/gov't	outpatient	national health insurance	no	yes	yes	yes	good	very easy	satisfied	very satisfied	satisfied
375	513 2	GH6	5	13	usual resident	1380	women_GDHS_14.dta	northern rural	5	401436		25-29	female		unexposed	northern	rural	other	christianity	primary education	6	poorest	-95451		no		yes	no	no	no	yes	no		yes, paid by a relative / friend	yes, valid		yes	public/gov't	outpatient	national health insurance	no	yes	yes	yes	good	easy	satisfied	satisfied	satisfied
376	524 2	GH6	5	24	usual resident	1380	women_GDHS_14.dta	northern rural	5	401436		25-29	female		unexposed	northern	rural	other	christianity	none	0	poorest	-175375		no		yes	no	no	no	yes	no		yes, paid by a relative / friend	yes, valid		yes	public/gov't	outpatient	national health insurance	no	yes	yes	yes	very good	very easy	fairly satisfied	very satisfied	fairly satisfied
377	525 15	GH6	5	25	usual resident	1380	women_GDHS_14.dta	northern rural	5	401436		25-29	female		unexposed	northern	rural	other	christianity	none	0	poorest	-135387		no		yes	no	no	no	yes	no		yes, paid by a relative / friend	yes, valid		yes	public/gov't	outpatient	national health insurance	no	yes	yes	yes	good	easy	satisfied	very satisfied	very satisfied
378	530 6	GH6	5	30	usual resident	1380	women_GDHS_14.dta	northern rural	5	401436		40-44	female		unexposed	northern	rural	other	christianity	none	0	poorest	-123901		no		yes	no	no	no	yes	no		yes, paid myself	yes, valid		yes	public/gov't	outpatient	national health insurance	no	no	no	no	good	easy	very satisfied	not satisfied	fairly satisfied
379	6 1 2	GH6	6	1	usual resident	1377	women_GDHS_14.dta	ashanti urban	6	1580506		25-29	female		exposed	ashanti	urban	akan	christianity	secondary/higher	12	richest	124342		no		yes	no	no	no	yes	no		yes, paid by a relative / friend	yes, valid		yes	private	outpatient	national health insurance	no	yes	no	yes	good	fairly easy	very dissatisfied	fairly satisfied	not satisfied
380	6 8 1	GH6	6	8	usual resident	1377	women_GDHS_14.dta	ashanti urban	6	1580506		40-44	female		exposed	ashanti	urban	other	christianity	secondary/higher	11	richest	103773		no		yes	no	no	no	yes	no		yes, paid myself	yes, valid		yes	public/gov't	outpatient	cash	yes	no	no	yes	good	easy	fairly satisfied	satisfied	not satisfied
381	611 2	GH6	6	11	usual resident	1377	women_GDHS_14.dta	ashanti urban	6	1580506		over44	female		exposed	ashanti	urban	akan	christianity	secondary/higher	16	richest	142878		yes		yes	no	no	no	yes	no		yes, paid by employer/ssnit	yes, valid		yes	private	outpatient	national health insurance	no	yes	yes	yes	good	easy	fairly satisfied	fairly satisfied	fairly satisfied
382	613 2	GH6	6	13	usual resident	1377	women_GDHS_14.dta	ashanti urban	6	1580506		25-29	female		exposed	ashanti	urban	akan	christianity	secondary/higher	9	richest	145140		no		yes	no	no	no	yes	no		yes, paid myself	yes, valid		yes	private	outpatient	national health insurance	no	yes	no	yes	good	fairly easy	fairly satisfied	fairly satisfied	fairly satisfied
383	615 2	GH6	6	15	usual resident	1377	women_GDHS_14.dta	ashanti urban	6	1580506		30-34	female		exposed	ashanti	urban	ewe	christianity	secondary/higher	9	richer	72909		no		yes	no	no	no	yes	no		yes, paid by a relative / friend	yes, valid		yes	private	outpatient	national health insurance	no	yes	yes	yes	good	very easy	very satisfied	very satisfied	satisfied
384	631 1	GH6	6	31	usual resident	1377	women_GDHS_14.dta	ashanti urban	6	1580506		30-34	female		exposed	ashanti	urban	akan	christianity	secondary/higher	12	richest	132568		yes		yes	no	no	no	yes	no		yes, paid myself	yes, valid		yes	private	outpatient	national health insurance	no	no	no	yes	poor	difficult	very dissatisfied	very dissatisfied
385	7 2 2	GH6	7	2	usual resident	1378	women_GDHS_14.dta	central rural	7	880704		25-29	female		unexposed	central	rural	akan	christianity	secondary/higher	12	richer	53614		no		yes	no	no	no	yes	no		yes, paid by a relative / friend	yes, valid		yes	public/gov't	outpatient	national health insurance	no	yes	yes	yes	very good	very easy	satisfied	very satisfied	satisfied
386	7 8 2	GH6	7	8	usual resident	1378	women_GDHS_14.dta	central rural	7	880704		25-29	female		unexposed	central	rural	akan	christianity	secondary/higher	9	middle	31938		no		yes	no	no	no	yes	no		yes, paid by a relative / friend	yes, valid		yes	public/gov't	outpatient	national health insurance	no	yes	yes	no	very good	very easy	satisfied	satisfied	satisfied
387	7 9 1	GH6	7	9	usual resident	1378	women_GDHS_14.dta	central rural	7	880704		25-29	female		unexposed	central	rural	akan	christianity	secondary/higher	9	middle	14049		no		yes	no	no	no	yes	no		yes, paid myself	yes, valid		yes	public/gov't	outpatient	national health insurance	no	yes	yes	yes	very good	very easy	satisfied	satisfied	satisfied
388	718 2	GH6	7	18	usual resident	1378	women_GDHS_14.dta	central rural	7	880704		40-44	female		unexposed	central	rural	ewe	other	none	0	poorer	-65374		no		yes	no	no	no	yes	no		yes, paid by a relative / friend	yes, valid		yes	public/gov't	outpatient	national health insurance	no	yes	yes	yes	very good	very easy	satisfied	satisfied	satisfied
389	723 1	GH6	7	23	usual resident	1378	women_GDHS_14.dta	central rural	7	880704		25-29	female		unexposed	central	rural	akan	christianity	primary education	5	poorer	-51090		no		yes	no	no	no	yes	no		yes, paid by a relative / friend	yes, valid		yes	public/gov't	outpatient	national health insurance	no	yes	yes	yes	good	very easy	satisfied	satisfied	satisfied
390	820 3	GH6	8	20	usual resident	1378	women_GDHS_14.dta	ashanti urban	8	1585700		25-29	female		exposed	ashanti	urban	akan	islam	secondary/higher	12	richer	60347		no		yes	no	no	no	yes	no		yes, paid by a relative / friend	yes, valid		yes	private	outpatient	cash	yes	yes	yes	yes	good	very easy	satisfied	satisfied	fairly satisfied
391	9 7 2	GH6	9	7	usual resident	1378	women_GDHS_14.dta	central urban	9	552404		15-19	female		unexposed	central	urban	akan	islam	secondary/higher	8	middle	20965		no		yes	no	no	no	yes	no		yes, paid by a relative / friend	yes, valid		yes	public/gov't	outpatient	national health insurance	no	yes	yes	yes	good	easy	satisfied	very satisfied	very satisfied
392	918 2	GH6	9	18	usual resident	1378	women_GDHS_14.dta	central urban	9	552404		25-29	female		unexposed	central	urban	mole_dagbani	islam	primary education	4	middle	5771		no		yes	no	no	no	yes	no		yes, paid by a relative / friend	yes, valid		yes	public/gov't	outpatient	national health insurance	no	yes	yes	yes	very good	very easy	satisfied	satisfied	satisfied
393	930 2	GH6	9	30	usual resident	1378	women_GDHS_14.dta	central urban	9	552404		40-44	female		unexposed	central	urban	akan	christianity	primary education	2	richest	137095		no		yes	no	no	no	yes	no		yes, paid myself	yes, valid		yes	private	outpatient	cash	yes	yes	yes	yes	very good	easy	satisfied	satisfied	satisfied
394	1011 1	GH6	10	11	usual resident	1377	women_GDHS_14.dta	volta rural	10	382844		over44	female		unexposed	volta	rural	ewe	christianity	secondary/higher	10	middle	26339		yes		yes	no	no	no	yes	no		yes, paid myself	yes, valid		yes	public/gov't	outpatient	cash	yes	yes	yes	yes	fair	difficult	not satisfied	not satisfied	fairly satisfied
395	1018 2	GH6	10	18	usual resident	1377	women_GDHS_14.dta	volta rural	10	382844		over44	female		unexposed	volta	rural	other	christianity	none	0	poorer	-31163		no		yes	no	no	no	yes	no		yes, paid by a relative / friend	yes, valid		yes	private	outpatient	cash	yes	yes	yes	yes	very good	very easy	very satisfied	very satisfied	very satisfied
396	11 1 2	GH6	11	1	usual resident	1378	women_GDHS_14.dta	brong ahafo rural	11	847940		30-34	female		unexposed	brong ahafo	rural	akan	other	none	0	poorest	-90894		no		yes	no	no	no	yes	no		yes, paid myself	yes, valid		yes	public/gov't	outpatient	national health insurance	no	yes	yes	yes	good	very easy	fairly satisfied	satisfied	not satisfied
397	11 5 2	GH6	11	5	usual resident	1377	women_GDHS_14.dta	brong ahafo rural	11	847940		30-34	female		unexposed	brong ahafo	rural	akan	christianity	primary education	3	poorer	-60119		no		yes	no	no	no	yes	no		yes, paid by a relative / friend	yes, valid		yes	public/gov't	outpatient	national health insurance	no	yes	yes	yes	good	easy	satisfied	satisfied	satisfied
398	11 5 4	GH6	11	5	visitor	1377	women_GDHS_14.dta	brong ahafo rural	11	847940		20-24	female		unexposed	brong ahafo	rural	akan	christianity	secondary/higher	11	poorer	-60119		no		yes	no	no	no	yes	no		yes, paid by a relative / friend	yes, valid		yes	public/gov't	outpatient	national health insurance	no	yes	yes	yes	good	easy	satisfied	satisfied	satisfied
399	11 5 5	GH6	11	5	visitor	1377	women_GDHS_14.dta	brong ahafo rural	11	847940		15-19	female		unexposed	brong ahafo	rural	akan	christianity	secondary/higher	9	poorer	-60119		no		yes	no	no	no	yes	no		yes, paid by a relative / friend	yes, valid		yes	public/gov't	outpatient	national health insurance	no	yes	yes	yes	good	easy	satisfied	satisfied	satisfied
400	11 5 14	GH6	11	5	visitor	1377	women_GDHS_14.dta	brong ahafo rural	11	847940		20-24	female		unexposed	brong ahafo	rural	akan	christianity	none	0	poorer	-60119		no		yes	no	no	no	yes	no		yes, paid by a relative / friend	yes, valid		yes	public/gov't	outpatient	national health insurance	no	yes	yes	yes	good	easy	very satisfied	satisfied	satisfied
401	11 6 3	GH6	11	6	usual resident	1377	women_GDHS_14.dta	brong ahafo rural	11	847940		15-19	female		unexposed	brong ahafo	rural	akan	christianity	none	0	poorest	-114495		no		yes	no	no	no	yes	no		yes, paid by a relative / friend	yes, valid		yes	public/gov't	outpatient	national health insurance	no	yes	yes	yes	good	easy	satisfied	satisfied	fairly satisfied
402	11 7 1	GH6	11	7	usual resident	1378	women_GDHS_14.dta	brong ahafo rural	11	847940		30-34	female		unexposed	brong ahafo	rural	akan	christianity	none	0	poorer	-72906		no		yes	no	no	no	yes	no		yes, paid myself	yes, valid		yes	public/gov't	outpatient	national health insurance	no	yes	yes	yes	good	easy	fairly satisfied	satisfied	fairly satisfied
403	1113 2	GH6	11	13	usual resident	1377	women_GDHS_14.dta	brong ahafo rural	11	847940		25-29	female		unexposed	brong ahafo	rural	akan	christianity	none	0	poorest	-94333		no		yes	no	no	no	yes	no		no, other	yes, valid		yes	public/gov't	outpatient	national health insurance	no	yes	yes	yes	very good	very easy	satisfied	satisfied	fairly satisfied
404	1117 3	GH6	11	17	usual resident	1377	women_GDHS_14.dta	brong ahafo rural	11	847940		35-39	female		unexposed	brong ahafo	rural	akan	christianity	none	0	poorest	-90422		no		yes	no	no	no	yes	no		yes, paid myself	yes, valid		yes	public/gov't	outpatient	national health insurance	no	yes	yes	yes	very good	easy	satisfied	satisfied	satisfied
405	1120 2	GH6	11	20	usual resident	1377	women_GDHS_14.dta	brong ahafo rural	11	847940		35-39	female		unexposed	brong ahafo	rural	akan	christianity	primary education	6	poorest	-104024		no		yes	no	no	no	yes	no		yes, paid myself	yes, valid		yes	public/gov't	outpatient	national health insurance	no	yes	yes	yes	good	easy	satisfied	satisfied
406	1121 2	GH6	11	21	usual resident	1378	women_GDHS_14.dta	brong ahafo rural	11	847940		15-19	female		unexposed	brong ahafo	rural	akan	christianity	primary education	3	poorest	-86305		yes		yes	no	no	no	yes	no		yes, paid by a relative / friend	yes, valid		yes	public/gov't	outpatient	national health insurance	no	yes	yes	yes	good	easy	satisfied	fairly satisfied
407	1128 2	GH6	11	28	usual resident	1377	women_GDHS_14.dta	brong ahafo rural	11	847940		30-34	female		unexposed	brong ahafo	rural	akan	christianity	secondary/higher	9	poorest	-98094		no		yes	no	no	no	yes	no		yes, paid myself	yes, valid		yes	public/gov't	outpatient	national health insurance	no	yes	yes	yes	good	very easy	satisfied	fairly satisfied	fairly satisfied
408	1130 2	GH6	11	30	usual resident	1378	women_GDHS_14.dta	brong ahafo rural	11	847940		25-29	female		unexposed	brong ahafo	rural	akan	christianity	primary education	6	poorer	-64441		no		yes	no	no	no	yes	no		yes, paid by a relative / friend	yes, valid		yes	public/gov't	outpatient	national health insurance	no	yes	yes	yes	good	easy	satisfied	satisfied	satisfied
409	1131 1	GH6	11	31	usual resident	1378	women_GDHS_14.dta	brong ahafo rural	11	847940		30-34	female		unexposed	brong ahafo	rural	akan	christianity	primary education	3	poorer	-55928		no		yes	no	no	no	yes	no		yes, paid by a relative / friend	yes, valid		yes	public/gov't	outpatient	national health insurance	no	yes	yes	yes	very good	very easy	fairly satisfied	satisfied	fairly satisfied
410	1133 1	GH6	11	33	usual resident	1378	women_GDHS_14.dta	brong ahafo rural	11	847940		25-29	female		unexposed	brong ahafo	rural	akan	christianity	secondary/higher	7	poorer	-71810		no		yes	no	no	no	yes	no		yes, paid by a relative / friend	yes, valid		yes	public/gov't	outpatient	national health insurance	no	yes	yes	yes	good	easy	satisfied	satisfied	satisfied
411	12 7 1	GH6	12	7	usual resident	1378	women_GDHS_14.dta	brong ahafo urban	12	947940		40-44	female		unexposed	brong ahafo	urban	akan	christianity	secondary/higher	16	richer	37564		yes		yes	no	no	no	yes	no		yes, paid myself	yes, valid		yes	public/gov't	outpatient	national health insurance	no	yes	yes	yes	good	very easy	very satisfied	fairly satisfied	satisfied
412	1223 1	GH6	12	23	usual resident	1378	women_GDHS_14.dta	brong ahafo urban	12	947940		35-39	female		unexposed	brong ahafo	urban	akan	christianity	secondary/higher	7	middle	-20091		no		yes	no	no	no	yes	no		yes, paid by a relative / friend	yes, valid		yes	public/gov't	outpatient	national health insurance	no	yes	yes	yes	good	easy	fairly satisfied	satisfied
413	1230 2	GH6	12	30	usual resident	1378	women_GDHS_14.dta	brong ahafo urban	12	947940		35-39	female		unexposed	brong ahafo	urban	akan	christianity	secondary/higher	9	richer	84515		no		yes	no	no	no	yes	no		yes, paid by a relative / friend	yes, valid		yes	public/gov't	outpatient	national health insurance	no	yes	yes	yes	very good	easy	satisfied	satisfied
414	13 2 1	GH6	13	2	usual resident	1379	women_GDHS_14.dta	brong ahafo urban	13	809606		over44	female		unexposed	brong ahafo	urban	akan	christianity	secondary/higher	10	middle	-11871		no		yes	no	no	no	yes	no		yes, paid by a relative / friend	yes, valid		yes	public/gov't	outpatient	national health insurance	no	yes	yes	yes	very good	very easy	very satisfied	very satisfied	satisfied
415	13 2 2	GH6	13	2	usual resident	1379	women_GDHS_14.dta	brong ahafo urban	13	809606		25-29	female		unexposed	brong ahafo	urban	akan	christianity	secondary/higher	12	middle	-11871		no		yes	no	no	no	yes	no		yes, paid by a relative / friend	yes, valid		yes	public/gov't	outpatient	national health insurance	no	yes	yes	yes	good	easy	satisfied	satisfied
416	1312 1	GH6	13	12	usual resident	1379	women_GDHS_14.dta	brong ahafo urban	13	809606		20-24	female		unexposed	brong ahafo	urban	akan	christianity	secondary/higher	11	middle	30003		no		yes	no	no	no	yes	no		yes, paid by a relative / friend	yes, valid		yes	public/gov't	outpatient	national health insurance	no	yes	yes	yes	good	easy	satisfied	satisfied	fairly satisfied
417	1313 1	GH6	13	13	usual resident	1379	women_GDHS_14.dta	brong ahafo urban	13	809606		35-39	female		unexposed	brong ahafo	urban	akan	christianity	secondary/higher	9	middle	-15086		no		yes	no	no	no	yes	no		8	yes, valid		yes	public/gov't	outpatient	national health insurance	no	yes	yes	yes	good	easy	very dissatisfied	satisfied
418	1315 2	GH6	13	15	usual resident	1379	women_GDHS_14.dta	brong ahafo urban	13	809606		35-39	female		unexposed	brong ahafo	urban	akan	christianity	primary education	1	middle	-2896		no		yes	no	no	no	yes	no		yes, paid myself	yes, valid		yes	public/gov't	outpatient	national health insurance	no	yes	yes	yes	good	very easy	very satisfied	very satisfied	very satisfied
419	1317 2	GH6	13	17	usual resident	1379	women_GDHS_14.dta	brong ahafo urban	13	809606		20-24	female		unexposed	brong ahafo	urban	akan	christianity	secondary/higher	7	poorest	-73556		no		yes	no	no	no	yes	no		yes, paid by a relative / friend	yes, valid		yes	public/gov't	outpatient	national health insurance	no	yes	yes	yes	very good	very easy	satisfied	fairly satisfied	fairly satisfied
420	1330 1	GH6	13	30	usual resident	1379	women_GDHS_14.dta	brong ahafo urban	13	809606		30-34	female		unexposed	brong ahafo	urban	akan	christianity	secondary/higher	9	middle	21190		no		yes	no	no	no	yes	no		yes, paid myself	yes, valid		yes	public/gov't	outpatient	combination of any of the above	yes	yes	yes	yes	good	very easy	very satisfied	very satisfied
421	14 1 2	GH6	14	1	usual resident	1379	women_GDHS_14.dta	northern urban	14	446309		25-29	female		unexposed	northern	urban	other	islam	secondary/higher	15	richer	42814		no		yes	no	no	no	yes	no		yes, paid by a relative / friend	yes, valid		yes	public/gov't	outpatient	national health insurance	no	yes	yes	yes	very good	very easy	very satisfied	very satisfied	very satisfied
422	14 8 1	GH6	14	8	usual resident	1379	women_GDHS_14.dta	northern urban	14	446309		30-34	female		unexposed	northern	urban	akan	christianity	secondary/higher	12	richer	65537		yes		yes	no	no	no	yes	no		yes, paid by a relative / friend	yes, valid		yes	public/gov't	outpatient	national health insurance	no	yes	yes	yes	very good	very easy	not satisfied	very satisfied	very dissatisfied
423	1411 1	GH6	14	11	usual resident	1380	women_GDHS_14.dta	northern urban	14	446309		20-24	female		unexposed	northern	urban	mole_dagbani	islam	secondary/higher	10	middle	-14206		no		yes	no	no	no	yes	no		yes, paid by a relative / friend	yes, valid		yes	public/gov't	outpatient	national health insurance	no	yes	yes	yes	good	easy	satisfied	satisfied	very satisfied
424	1412 1	GH6	14	12	usual resident	1379	women_GDHS_14.dta	northern urban	14	446309		30-34	female		unexposed	northern	urban	mole_dagbani	christianity	secondary/higher	14	middle	-8101		no		yes	no	no	no	yes	no		yes, paid myself	yes, valid		yes	public/gov't	outpatient	national health insurance	no	yes	yes	yes	good	very easy	not satisfied	satisfied	not satisfied
425	1415 1	GH6	14	15	usual resident	1380	women_GDHS_14.dta	northern urban	14	446309		20-24	female		unexposed	northern	urban	mole_dagbani	christianity	primary education	0	middle	-7593		no		yes	no	no	no	yes	no		yes, paid by a relative / friend	yes, valid		yes	public/gov't	outpatient	national health insurance	no	yes	yes	yes	very good	very easy	very satisfied	very satisfied
426	1416 2	GH6	14	16	usual resident	1379	women_GDHS_14.dta	northern urban	14	446309		30-34	female		unexposed	northern	urban	mole_dagbani	islam	secondary/higher	9	richer	38825		no		yes	no	no	no	yes	no		yes, paid by a relative / friend	yes, valid		yes	public/gov't	outpatient	national health insurance	no	yes	yes	yes	very good	very easy	very satisfied	very satisfied	satisfied
427	1428 1	GH6	14	28	usual resident	1379	women_GDHS_14.dta	northern urban	14	446309		40-44	female		unexposed	northern	urban	other	christianity	none	0	middle	-21611		no		yes	no	no	no	yes	no		yes, paid myself	yes, valid		yes	public/gov't	outpatient	national health insurance	no	yes	yes	yes	very good	very easy	satisfied	very satisfied	satisfied
428	1433 2	GH6	14	33	usual resident	1379	women_GDHS_14.dta	northern urban	14	446309		20-24	female		unexposed	northern	urban	mole_dagbani	islam	primary education	3	richer	42774		no		yes	no	no	no	yes	no		yes, paid by a relative / friend	yes, valid		yes	public/gov't	outpatient	national health insurance	no	yes	yes	yes	very good	very easy	very satisfied	very satisfied	satisfied
429	15 2 1	GH6	15	2	usual resident	1377	women_GDHS_14.dta	brong ahafo rural	15	782935		15-19	female		unexposed	brong ahafo	rural	other	christianity	secondary/higher	7	poorer	-35848		no		yes	no	no	no	yes	no		yes, paid by a relative / friend	yes, valid		yes	public/gov't	outpatient	national health insurance	no	yes	yes	yes	very good	very easy	very satisfied	very satisfied
430	15 7 1	GH6	15	7	usual resident	1377	women_GDHS_14.dta	brong ahafo rural	15	782935		35-39	female		unexposed	brong ahafo	rural	ewe	christianity	primary education	5	middle	-7341		no		yes	no	no	no	yes	no		yes, paid myself	yes, valid		yes	public/gov't	outpatient	cash	yes	yes	yes	yes	very good	very easy	satisfied	satisfied	very satisfied
431	1513 1	GH6	15	13	usual resident	1377	women_GDHS_14.dta	brong ahafo rural	15	782935		40-44	female		unexposed	brong ahafo	rural	other	christianity	secondary/higher	9	poorer	-48281		no		yes	no	no	no	yes	no		yes, paid by a relative / friend	yes, valid		yes	public/gov't	outpatient	national health insurance	no	yes	yes	yes	good	easy	satisfied	very satisfied	satisfied
432	1519 2	GH6	15	19	usual resident	1377	women_GDHS_14.dta	brong ahafo rural	15	782935		25-29	female		unexposed	brong ahafo	rural	akan	christianity	secondary/higher	9	poorer	-42147		no		yes	no	no	no	yes	no		yes, paid by a relative / friend	yes, valid		yes	public/gov't	outpatient	national health insurance	no	yes	yes	yes	fair	easy	fairly satisfied	fairly satisfied	satisfied
433	1528 1	GH6	15	28	usual resident	1377	women_GDHS_14.dta	brong ahafo rural	15	782935		25-29	female		unexposed	brong ahafo	rural	akan	christianity	primary education	6	poorer	-63614		no		yes	no	no	no	yes	no		yes, paid myself	yes, valid		yes	public/gov't	outpatient	national health insurance	no	yes	yes	yes	good	easy	satisfied	fairly satisfied	fairly satisfied
434	1532 3	GH6	15	32	usual resident	1377	women_GDHS_14.dta	brong ahafo rural	15	782935		15-19	female		unexposed	brong ahafo	rural	akan	christianity	secondary/higher	10	poorer	-31465		no		yes	no	no	no	yes	no		yes, paid by a relative / friend	yes, valid		yes	public/gov't	outpatient	cash	yes	yes	yes	yes	good	very easy	fairly satisfied	fairly satisfied	fairly satisfied
435	1616 2	GH6	16	16	usual resident	1379	women_GDHS_14.dta	eastern rural	16	1245974		25-29	female		unexposed	eastern	rural	other	islam	primary education	6	middle	-17110		no		yes	no	no	no	yes	no		yes, paid by a relative / friend	yes, valid		yes	public/gov't	outpatient	national health insurance	no	yes	yes	yes	good	easy	satisfied	satisfied
436	1618 2	GH6	16	18	usual resident	1379	women_GDHS_14.dta	eastern rural	16	1245974		35-39	female		unexposed	eastern	rural	other	islam	secondary/higher	10	poorer	-29970		no		yes	no	no	no	yes	no		yes, paid by a relative / friend	yes, valid		yes	public/gov't	outpatient	national health insurance	no	yes	yes	yes	very good	fairly easy	fairly satisfied	fairly satisfied
437	1621 2	GH6	16	21	usual resident	1379	women_GDHS_14.dta	eastern rural	16	1245974		20-24	female		unexposed	eastern	rural	other	christianity	secondary/higher	7	middle	-9279		no		yes	no	no	no	yes	no		8	yes, valid		yes	public/gov't	outpatient	national health insurance	no	no	yes	no	good	very easy	satisfied	satisfied	not satisfied
438	1627 3	GH6	16	27	usual resident	1379	women_GDHS_14.dta	eastern rural	16	1245974		35-39	female		unexposed	eastern	rural	other	christianity	secondary/higher	8	poorer	-49258		no		yes	no	no	no	yes	no		yes, paid myself	yes, valid		yes	public/gov't	outpatient	national health insurance	no	yes	yes	yes	very good	very easy	very satisfied	fairly satisfied
439	17 1 1	GH6	17	1	usual resident	1378	women_GDHS_14.dta	brong ahafo urban	17	580163		20-24	female		unexposed	brong ahafo	urban	akan	christianity	secondary/higher	12	richer	89707		no		yes	no	no	no	yes	no		yes, paid by a relative / friend	yes, valid		yes	public/gov't	outpatient	national health insurance	no	yes	yes	yes	good	fairly easy	fairly satisfied	fairly satisfied	not satisfied
440	17 9 2	GH6	17	9	usual resident	1378	women_GDHS_14.dta	brong ahafo urban	17	580163		35-39	female		unexposed	brong ahafo	urban	akan	christianity	secondary/higher	9	richer	55077		no		yes	no	no	no	yes	no		yes, paid myself	yes, valid		yes	public/gov't	outpatient	national health insurance	no	yes	yes	yes	good	easy	fairly satisfied	fairly satisfied
441	1715 2	GH6	17	15	usual resident	1378	women_GDHS_14.dta	brong ahafo urban	17	580163		25-29	female		unexposed	brong ahafo	urban	akan	islam	secondary/higher	9	richer	74700		no		yes	no	no	no	yes	no		yes, paid by a relative / friend	yes, valid		yes	public/gov't	outpatient	national health insurance	no	yes	yes	yes	good	easy	satisfied	satisfied	fairly satisfied
442	1716 2	GH6	17	16	usual resident	1378	women_GDHS_14.dta	brong ahafo urban	17	580163		35-39	female		unexposed	brong ahafo	urban	other	islam	none	0	middle	14123		yes		yes	no	no	no	yes	no		yes, paid by a relative / friend	yes, valid		yes	public/gov't	outpatient	national health insurance	no	yes	yes	yes	good	easy	satisfied	satisfied	satisfied
443	1717 2	GH6	17	17	usual resident	1378	women_GDHS_14.dta	brong ahafo urban	17	580163		30-34	female		unexposed	brong ahafo	urban	akan	christianity	secondary/higher	9	richer	73905		no		yes	no	no	no	yes	no		yes, paid myself	yes, valid		yes	public/gov't	outpatient	national health insurance	no	yes	yes	yes	good	easy	satisfied	satisfied	fairly satisfied
444	1718 2	GH6	17	18	usual resident	1378	women_GDHS_14.dta	brong ahafo urban	17	580163		40-44	female		unexposed	brong ahafo	urban	akan	christianity	secondary/higher	12	richest	136517		no		yes	no	no	no	yes	no		yes, paid myself	yes, valid		yes	public/gov't	outpatient	national health insurance	no	yes	yes	yes	fair	easy	fairly satisfied	fairly satisfied	fairly satisfied
445	1721 6	GH6	17	21	usual resident	1378	women_GDHS_14.dta	brong ahafo urban	17	580163		15-19	female		unexposed	brong ahafo	urban	other	islam	secondary/higher	9	richest	108014		yes		yes	no	no	no	yes	no		yes, paid by a relative / friend	yes, valid		yes	public/gov't	outpatient	national health insurance	no	yes	yes	yes	good	easy	satisfied	satisfied	fairly satisfied
446	1728 2	GH6	17	28	usual resident	1378	women_GDHS_14.dta	brong ahafo urban	17	580163		25-29	female		unexposed	brong ahafo	urban	akan	islam	secondary/higher	9	richer	54376		no		yes	no	no	no	yes	no		yes, paid by a relative / friend	yes, valid		yes	public/gov't	outpatient	national health insurance	no	yes	yes	yes	good	easy	fairly satisfied	satisfied
447	1732 1	GH6	17	32	usual resident	1378	women_GDHS_14.dta	brong ahafo urban	17	580163		35-39	female		unexposed	brong ahafo	urban	other	islam	none	0	middle	24317		no		yes	no	no	no	yes	no		yes, paid myself	yes, valid		yes	public/gov't	outpatient	national health insurance	no	yes	yes	yes	good	very easy	satisfied	satisfied	satisfied
448	1733 2	GH6	17	33	usual resident	1378	women_GDHS_14.dta	brong ahafo urban	17	580163		20-24	female		unexposed	brong ahafo	urban	other	islam	primary education	6	middle	777		no		yes	no	no	no	yes	no		yes, paid by a relative / friend	yes, valid		yes	public/gov't	outpatient	combination of any of the above	yes	yes	yes	yes	good	easy	fairly satisfied	fairly satisfied	fairly satisfied
449	18 4 1	GH6	18	4	usual resident	1378	women_GDHS_14.dta	volta rural	18	538113		20-24	female		unexposed	volta	rural	ewe	christianity	secondary/higher	11	poorer	-45180		no		yes	no	no	no	yes	no		yes, paid by a relative / friend	yes, valid		yes	public/gov't	outpatient	national health insurance	no	no	no	yes	good	fairly easy	satisfied	fairly satisfied	fairly satisfied
450	18 6 1	GH6	18	6	usual resident	1378	women_GDHS_14.dta	volta rural	18	538113		40-44	female		unexposed	volta	rural	ewe	christianity	secondary/higher	10	middle	12638		yes		yes	no	no	no	yes	no		yes, paid myself	yes, valid		yes	public/gov't	outpatient	cash	yes	yes	yes	yes	fair	very difficult	fairly satisfied	fairly satisfied	not satisfied
451	18 7 2	GH6	18	7	usual resident	1378	women_GDHS_14.dta	volta rural	18	538113		over44	female		unexposed	volta	rural	ewe	christianity	secondary/higher	10	middle	-23817		no		yes	no	no	no	yes	no		yes, paid by a relative / friend	yes, valid		yes	public/gov't	outpatient	national health insurance	no	yes	yes	yes	good	easy	not satisfied	satisfied	satisfied
452	18 7 3	GH6	18	7	usual resident	1378	women_GDHS_14.dta	volta rural	18	538113		30-34	female		unexposed	volta	rural	ewe	christianity	secondary/higher	12	middle	-23817		no		yes	no	no	no	yes	no		yes, paid myself	yes, valid		yes	public/gov't	outpatient	national health insurance	no	yes	yes	yes	fair	easy	fairly satisfied	fairly satisfied	satisfied
453	1811 1	GH6	18	11	usual resident	1378	women_GDHS_14.dta	volta rural	18	538113		35-39	female		unexposed	volta	rural	ewe	christianity	secondary/higher	9	middle	-5025		no		yes	no	no	no	yes	no		yes, paid myself	yes, valid		yes	public/gov't	outpatient	national health insurance	no	yes	no	yes	fair	fairly easy	fairly satisfied	fairly satisfied	not satisfied
454	1815 1	GH6	18	15	usual resident	1378	women_GDHS_14.dta	volta rural	18	538113		30-34	female		unexposed	volta	rural	other	christianity	secondary/higher	12	poorer	-72674		no		yes	no	no	no	yes	no		yes, paid myself	yes, valid		yes	public/gov't	outpatient	national health insurance	no	yes	yes	yes	good	fairly easy	not satisfied	fairly satisfied	satisfied
455	1823 1	GH6	18	23	usual resident	1378	women_GDHS_14.dta	volta rural	18	538113		30-34	female		unexposed	volta	rural	ewe	christianity	secondary/higher	9	middle	14361		no		yes	no	no	no	yes	no		yes, paid myself	yes, valid		yes	public/gov't	outpatient	national health insurance	no	yes	yes	no	good	fairly easy	very dissatisfied	not satisfied	not satisfied
456	1927 2	GH6	19	27	usual resident	1379	women_GDHS_14.dta	ashanti rural	19	337076		20-24	female		exposed	ashanti	rural	akan	christianity	secondary/higher	9	poorer	-65405		no		yes	no	no	no	yes	no		yes, paid by a relative / friend	yes, valid		yes	public/gov't	outpatient	national health insurance	no	yes	yes	yes	good	easy	not satisfied	fairly satisfied	satisfied
457	1932 2	GH6	19	32	usual resident	1380	women_GDHS_14.dta	ashanti rural	19	337076		35-39	female		exposed	ashanti	rural	mole_dagbani	christianity	none	0	poorest	-96069		no		yes	no	no	no	yes	no		yes, paid by a relative / friend	yes, valid		yes	public/gov't	outpatient	national health insurance	no	yes	yes	yes	good	easy	fairly satisfied	satisfied	very satisfied
458	20 1 5	GH6	20	1	usual resident	1377	women_GDHS_14.dta	upper east rural	20	353430		40-44	female		unexposed	upper east	rural	mole_dagbani	christianity	none	0	poorest	-251185		no		yes	no	no	no	yes	no		yes, paid myself	yes, valid		yes	public/gov't	outpatient	national health insurance	no	yes	yes	yes	good	easy	very satisfied	satisfied	satisfied
459	2011 3	GH6	20	11	usual resident	1377	women_GDHS_14.dta	upper east rural	20	353430		15-19	female		unexposed	upper east	rural	mole_dagbani	islam	primary education	5	poorest	-79406		no		yes	no	no	no	yes	no		8	yes, valid		yes	public/gov't	outpatient	national health insurance	no	yes	yes	no	good	easy	satisfied
460	2020 2	GH6	20	20	usual resident	1377	women_GDHS_14.dta	upper east rural	20	353430		35-39	female		unexposed	upper east	rural	mole_dagbani	islam	secondary/higher	10	poorest	-127145		no		yes	no	no	no	yes	no		yes, paid by a relative / friend	yes, valid		yes	public/gov't	outpatient	national health insurance	no	yes	no	yes	good	easy	fairly satisfied	satisfied	fairly satisfied
461	2022 3	GH6	20	22	usual resident	1377	women_GDHS_14.dta	upper east rural	20	353430		15-19	female		unexposed	upper east	rural	mole_dagbani	christianity	secondary/higher	7	poorest	-146154		no		yes	no	no	no	yes	no		yes, paid by a relative / friend	yes, valid		yes	public/gov't	outpatient	national health insurance	no	yes	yes	yes	good	easy	satisfied	satisfied
462	2025 2	GH6	20	25	usual resident	1377	women_GDHS_14.dta	upper east rural	20	353430		30-34	female		unexposed	upper east	rural	mole_dagbani	islam	none	0	poorest	-167983		no		yes	no	no	no	yes	no		yes, paid myself	yes, valid		yes	public/gov't	outpatient	national health insurance	no	yes	yes	yes	good	easy	satisfied	very satisfied	satisfied
463	21 5 2	GH6	21	5	usual resident	1378	women_GDHS_14.dta	northern rural	21	609432		40-44	female		unexposed	northern	rural	other	other	none	0	poorest	-137716		no		yes	no	no	no	yes	no		yes, paid myself	yes, valid		yes	public/gov't	outpatient	national health insurance	no	yes	yes	yes	good	easy	not satisfied	satisfied	fairly satisfied
464	2122 3	GH6	21	22	usual resident	1378	women_GDHS_14.dta	northern rural	21	609432		30-34	female		unexposed	northern	rural	other	christianity	secondary/higher	12	poorest	-116134		no		yes	no	no	no	yes	no		yes, paid myself	yes, valid		yes	public/gov't	outpatient	national health insurance	no	yes	yes	yes	good	difficult	satisfied	very satisfied	not satisfied
465	22 8 3	GH6	22	8	usual resident	1378	women_GDHS_14.dta	upper west rural	22	337176		35-39	female		unexposed	upper west	rural	other	christianity	none	0	poorest	-100702		no		yes	no	no	no	yes	no		yes, paid by a relative / friend	yes, valid		yes	public/gov't	outpatient	national health insurance	no	yes	yes	yes	good	fairly easy	fairly satisfied	very satisfied
466	2217 2	GH6	22	17	usual resident	1378	women_GDHS_14.dta	upper west rural	22	337176		25-29	female		unexposed	upper west	rural	mole_dagbani	other	none	0	poorest	-123925		no		yes	no	no	no	yes	no		yes, paid by a relative / friend	yes, valid		yes	public/gov't	outpatient	national health insurance	no	yes	yes	yes	fair	easy	not satisfied	not satisfied	not satisfied
467	2220 2	GH6	22	20	usual resident	1378	women_GDHS_14.dta	upper west rural	22	337176		20-24	female		unexposed	upper west	rural	other	christianity	none	0	poorest	-188870		no		yes	no	no	no	yes	no		yes, paid myself	yes, valid		yes	public/gov't	outpatient	national health insurance	no	yes	yes	no	very good	easy	satisfied	very satisfied
468	2221 2	GH6	22	21	usual resident	1378	women_GDHS_14.dta	upper west rural	22	337176		30-34	female		unexposed	upper west	rural	other	other	none	0	poorest	-108239		no		yes	no	no	no	yes	no		no, other	yes, valid		yes	public/gov't	outpatient	national health insurance	no	yes	yes	yes	good	easy	very satisfied	very satisfied	very satisfied
469	2232 2	GH6	22	32	usual resident	1378	women_GDHS_14.dta	upper west rural	22	337176		20-24	female		unexposed	upper west	rural	other	christianity	none	0	poorest	-127588		no		yes	no	no	no	yes	no		yes, paid by a relative / friend	yes, valid		yes	public/gov't	outpatient	national health insurance	no	yes	no	no	fair	fairly easy	very satisfied	very satisfied
470	23 1 2	GH6	23	1	usual resident	1380	women_GDHS_14.dta	brong ahafo urban	23	736147		30-34	female		unexposed	brong ahafo	urban	akan	christianity	secondary/higher	9	richer	62106		no		yes	no	no	no	yes	no		yes, paid myself	yes, valid		yes	public/gov't	outpatient	national health insurance	no	yes	yes	yes	very good	easy	very satisfied	very satisfied
471	23 3 2	GH6	23	3	usual resident	1380	women_GDHS_14.dta	brong ahafo urban	23	736147		30-34	female		unexposed	brong ahafo	urban	akan	christianity	secondary/higher	9	middle	31977		no		yes	no	no	no	yes	no		yes, paid by a relative / friend	yes, valid		yes	public/gov't	outpatient	national health insurance	no	yes	yes	yes	good	easy	satisfied	satisfied	satisfied
472	23 9 2	GH6	23	9	usual resident	1380	women_GDHS_14.dta	brong ahafo urban	23	736147		25-29	female		unexposed	brong ahafo	urban	akan	christianity	secondary/higher	9	middle	26947		no		yes	no	no	no	yes	no		yes, paid by a relative / friend	yes, valid		yes	private	outpatient	national health insurance	no	yes	yes	yes	good	easy	fairly satisfied	fairly satisfied	satisfied
473	2313 2	GH6	23	13	usual resident	1380	women_GDHS_14.dta	brong ahafo urban	23	736147		20-24	female		unexposed	brong ahafo	urban	akan	christianity	secondary/higher	8	richer	78845		no		yes	no	no	no	yes	no		yes, paid by a relative / friend	yes, valid		yes	public/gov't	outpatient	national health insurance	no	yes	yes	yes	very good	easy	satisfied	satisfied
474	2317 2	GH6	23	17	usual resident	1380	women_GDHS_14.dta	brong ahafo urban	23	736147		over44	female		unexposed	brong ahafo	urban	akan	christianity	secondary/higher	10	richest	116922		yes		yes	no	no	no	yes	no		yes, paid by a relative / friend	yes, valid		yes	private	outpatient	cash	yes	yes	yes	yes	very good	very easy	very satisfied	very satisfied	very satisfied
475	2412 6	GH6	24	12	usual resident	1377	women_GDHS_14.dta	upper east rural	24	434965		15-19	female		unexposed	upper east	rural	mole_dagbani	christianity	secondary/higher	9	poorest	-194638		no		yes	no	no	no	yes	no		yes, paid by a relative / friend	yes, valid		yes	public/gov't	outpatient	national health insurance	no	yes	yes	yes	very good	easy	satisfied	satisfied	satisfied
476	2527 5	GH6	25	27	usual resident	1377	women_GDHS_14.dta	central urban	25	811311		15-19	female		unexposed	central	urban	ewe	christianity	secondary/higher	9	middle	14961		no		yes	no	no	no	yes	no		yes, paid by a relative / friend	yes, valid		yes	public/gov't	outpatient	national health insurance	no	yes	yes	yes	fair	very easy	satisfied	very satisfied	satisfied
477	26 4 1	GH6	26	4	usual resident	1378	women_GDHS_14.dta	eastern rural	26	885516		30-34	female		unexposed	eastern	rural	other	christianity	primary education	2	poorer	-39921		no		yes	no	no	no	yes	no		yes, paid myself	yes, valid		yes	public/gov't	outpatient	national health insurance	no	yes	yes	yes	fair	easy	very satisfied	very satisfied	very satisfied
478	2611 2	GH6	26	11	usual resident	1378	women_GDHS_14.dta	eastern rural	26	885516		30-34	female		unexposed	eastern	rural	akan	christianity	secondary/higher	7	poorer	-67656		no		yes	no	no	no	yes	no		yes, paid by a relative / friend	yes, valid		yes	public/gov't	outpatient	national health insurance	no	yes	yes	yes	fair	difficult	satisfied
479	27 2 2	GH6	27	2	usual resident	1378	women_GDHS_14.dta	northern rural	27	638545		40-44	female		unexposed	northern	rural	other	other	none	0	poorest	-98685		no		yes	no	no	no	yes	no		yes, paid myself	yes, valid		yes	public/gov't	outpatient	national health insurance	no	yes	yes	yes	good	easy	satisfied	satisfied	satisfied
480	2724 5	GH6	27	24	usual resident	1378	women_GDHS_14.dta	northern rural	27	638545		25-29	female		unexposed	northern	rural	other	christianity	none	0	poorest	-168224		no		yes	no	no	no	yes	no		yes, paid myself	yes, valid		yes	public/gov't	outpatient	national health insurance	no	no	yes	yes	good	easy	very satisfied	very satisfied	fairly satisfied
481	2725 2	GH6	27	25	usual resident	1378	women_GDHS_14.dta	northern rural	27	638545		35-39	female		unexposed	northern	rural	other	christianity	primary education	2	poorest	-88068		no		yes	no	no	no	yes	no		yes, paid myself	yes, valid		yes	public/gov't	outpatient	national health insurance	no	no	no	yes	fair	difficult	not satisfied	fairly satisfied
482	2732 2	GH6	27	32	usual resident	1378	women_GDHS_14.dta	northern rural	27	638545		25-29	female		unexposed	northern	rural	other	christianity	none	0	poorest	-94885		no		yes	no	no	no	yes	no		yes, paid myself	yes, valid		yes	public/gov't	outpatient	national health insurance	no	no	yes	no	good	easy	not satisfied	satisfied	not satisfied
483	28 9 2	GH6	28	9	usual resident	1379	women_GDHS_14.dta	greater accra rural	28	1307936		over44	female		unexposed	greater accra	rural	ewe	christianity	secondary/higher	10	richest	167205		no		yes	no	no	no	yes	no		yes, paid myself	yes, valid		yes	public/gov't	outpatient	national health insurance	no	yes	yes	yes	very good	easy	very satisfied	very satisfied	very satisfied
484	2817 1	GH6	28	17	usual resident	1379	women_GDHS_14.dta	greater accra rural	28	1307936		35-39	female		unexposed	greater accra	rural	akan	islam	primary education	4	richer	53907		yes		yes	no	no	no	yes	no		yes, paid by a relative / friend	yes, valid		yes	public/gov't	outpatient	national health insurance	no	yes	no	yes	good	very easy	satisfied	very satisfied
485	2823 2	GH6	28	23	usual resident	1379	women_GDHS_14.dta	greater accra rural	28	1307936		30-34	female		unexposed	greater accra	rural	ewe	christianity	secondary/higher	9	richer	81237		no		yes	no	no	no	yes	no		8	yes, valid		yes	public/gov't	outpatient	national health insurance	no	yes	no	yes	very good	very easy	very satisfied	very satisfied	very satisfied
486	2825 2	GH6	28	25	usual resident	1379	women_GDHS_14.dta	greater accra rural	28	1307936		30-34	female		unexposed	greater accra	rural	akan	christianity	secondary/higher	9	richer	57767		no		yes	no	no	no	yes	no		no, exempt as indigent	yes, valid		yes	public/gov't	outpatient	national health insurance	no	yes	yes	yes	good	easy	fairly satisfied	satisfied	satisfied
487	2826 2	GH6	28	26	usual resident	1379	women_GDHS_14.dta	greater accra rural	28	1307936		30-34	female		unexposed	greater accra	rural	ewe	christianity	secondary/higher	9	richer	81628		no		yes	no	no	no	yes	no		no, exempt as indigent	yes, valid		yes	public/gov't	outpatient	cash	yes	yes	yes	yes	poor	very easy	not satisfied	satisfied	satisfied
488	29 4 2	GH6	29	4	usual resident	1378	women_GDHS_14.dta	ashanti urban	29	1246190		over44	female		exposed	ashanti	urban	akan	christianity	secondary/higher	10	richest	136457		no		yes	no	no	no	yes	no		yes, paid by a relative / friend	yes, valid		yes	public/gov't	outpatient	national health insurance	no	yes	yes	yes	very good	very easy	very satisfied	very satisfied	very satisfied
489	29 6 3	GH6	29	6	usual resident	1378	women_GDHS_14.dta	ashanti urban	29	1246190		15-19	female		exposed	ashanti	urban	akan	christianity	secondary/higher	8	richest	137963		no		yes	no	no	no	yes	no		yes, paid by a relative / friend	yes, valid		yes	public/gov't	outpatient	national health insurance	no	yes	yes	yes	good	easy	satisfied	satisfied	satisfied
490	2914 1	GH6	29	14	usual resident	1378	women_GDHS_14.dta	ashanti urban	29	1246190		30-34	female		exposed	ashanti	urban	akan	christianity	secondary/higher	13	richer	86519		no		yes	no	no	no	yes	no		yes, paid myself	yes, valid		yes	public/gov't	outpatient	national health insurance	no	yes	yes	yes	very good	very easy	satisfied	very satisfied	satisfied
491	30 9 2	GH6	30	9	usual resident	1377	women_GDHS_14.dta	brong ahafo rural	30	515974		30-34	female		unexposed	brong ahafo	rural	akan	christianity	primary education	2	poorest	-79379		no		yes	no	no	no	yes	no		8	yes, valid		yes	public/gov't	outpatient	national health insurance	no	no	no	no	fair	difficult	very dissatisfied	very dissatisfied	fairly satisfied
492	3014 1	GH6	30	14	usual resident	1377	women_GDHS_14.dta	brong ahafo rural	30	515974		over44	female		unexposed	brong ahafo	rural	akan	other	primary education	1	poorer	-27721		no		yes	no	no	no	yes	no		yes, paid by a relative / friend	yes, valid		yes	public/gov't	outpatient	national health insurance	no	yes	yes	yes	good	easy	satisfied	very satisfied	very satisfied
493	3015 1	GH6	30	15	usual resident	1377	women_GDHS_14.dta	brong ahafo rural	30	515974		25-29	female		unexposed	brong ahafo	rural	akan	islam	secondary/higher	13	middle	-13030		no		yes	no	no	no	yes	no		8	yes, valid		yes	public/gov't	outpatient	national health insurance	no	yes	yes	yes	fair	fairly easy	fairly satisfied	satisfied	satisfied
494	3016 3	GH6	30	16	usual resident	1377	women_GDHS_14.dta	brong ahafo rural	30	515974		20-24	female		unexposed	brong ahafo	rural	akan	christianity	secondary/higher	10	poorer	-67731		no		yes	no	no	no	yes	no		yes, paid by a relative / friend	yes, valid		yes	public/gov't	outpatient	national health insurance	no	yes	no	yes	very good	very easy	very satisfied	very satisfied	satisfied
495	3032 4	GH6	30	32	usual resident	1377	women_GDHS_14.dta	brong ahafo rural	30	515974		15-19	female		unexposed	brong ahafo	rural	akan	christianity	secondary/higher	9	poorer	-26831		no		yes	no	no	no	yes	no		yes, paid by a relative / friend	yes, valid		yes	public/gov't	outpatient	national health insurance	no	yes	yes	yes	good	very easy	very satisfied	very satisfied
496	3033 2	GH6	30	33	usual resident	1377	women_GDHS_14.dta	brong ahafo rural	30	515974		20-24	female		unexposed	brong ahafo	rural	akan	christianity	primary education	3	poorer	-40879		no		yes	no	no	no	yes	no		yes, paid by a relative / friend	yes, valid		yes	public/gov't	outpatient	national health insurance	no	yes	yes	yes	good	very easy	very satisfied	very satisfied
497	31 4 2	GH6	31	4	usual resident	1377	women_GDHS_14.dta	volta rural	31	867969		25-29	female		unexposed	volta	rural	other	christianity	none	0	poorest	-195288		no		yes	no	no	no	yes	no		yes, paid myself	yes, valid		yes	public/gov't	outpatient	national health insurance	no	yes	yes	yes	fair	fairly easy	not satisfied	fairly satisfied	not satisfied
498	31 7 2	GH6	31	7	usual resident	1377	women_GDHS_14.dta	volta rural	31	867969		25-29	female		unexposed	volta	rural	other	other	none	0	poorer	-72442		no		yes	no	no	no	yes	no		yes, paid myself	yes, valid		yes	public/gov't	outpatient	national health insurance	no	yes	yes	yes	fair	difficult	fairly satisfied	fairly satisfied	satisfied
499	3116 3	GH6	31	16	usual resident	1377	women_GDHS_14.dta	volta rural	31	867969		15-19	female		unexposed	volta	rural	other	christianity	secondary/higher	11	poorest	-77813		no		yes	no	no	no	yes	no		yes, paid by a relative / friend	yes, valid		yes	public/gov't	outpatient	national health insurance	no	yes	yes	yes	good	easy	satisfied	satisfied	very satisfied
500	3120 2	GH6	31	20	usual resident	1377	women_GDHS_14.dta	volta rural	31	867969		30-34	female		unexposed	volta	rural	other	other	none	0	poorer	-71838		no		yes	no	no	no	yes	no		yes, paid myself	yes, valid		yes	public/gov't	outpatient	national health insurance	no	yes	yes	yes	fair	fairly easy	fairly satisfied	fairly satisfied	fairly satisfied
501	3129 2	GH6	31	29	usual resident	1377	women_GDHS_14.dta	volta rural	31	867969		25-29	female		unexposed	volta	rural	other	christianity	none	0	poorest	-77403		no		yes	no	no	no	yes	no		yes, paid by a relative / friend	yes, valid		yes	public/gov't	outpatient	national health insurance	no	yes	yes	yes	good	easy	fairly satisfied	satisfied	satisfied
502	33 6 2	GH6	33	6	usual resident	1378	women_GDHS_14.dta	eastern rural	33	784179		15-19	female		unexposed	eastern	rural	akan	christianity	primary education	6	middle	-4099		no		yes	no	no	no	yes	no		yes, paid by a relative / friend	yes, valid		yes	public/gov't	outpatient	national health insurance	no	yes	yes	yes	very good	easy	satisfied	fairly satisfied	satisfied
503	3319 2	GH6	33	19	usual resident	1378	women_GDHS_14.dta	eastern rural	33	784179		over44	female		unexposed	eastern	rural	other	christianity	none	0	poorer	-69255		yes		yes	no	no	no	yes	no		yes, paid by a relative / friend	yes, valid		yes	public/gov't	outpatient	national health insurance	no	yes	yes	yes	very good	easy	satisfied	fairly satisfied	satisfied
504	3328 2	GH6	33	28	usual resident	1378	women_GDHS_14.dta	eastern rural	33	784179		20-24	female		unexposed	eastern	rural	akan	christianity	secondary/higher	9	poorer	-60339		no		yes	no	no	no	yes	no		yes, paid by a relative / friend	yes, valid		yes	public/gov't	outpatient	national health insurance	no	yes	yes	yes	good	easy	fairly satisfied	fairly satisfied	fairly satisfied
505	34 3 5	GH6	34	3	usual resident	1377	women_GDHS_14.dta	eastern rural	34	389367		15-19	female		unexposed	eastern	rural	ewe	christianity	secondary/higher	12	poorest	-94515		no		yes	no	no	no	yes	no		yes, paid by a relative / friend	yes, valid		yes	public/gov't	outpatient	national health insurance	no	yes	yes	yes	good	very easy	very satisfied	very satisfied	very satisfied
506	34 4 1	GH6	34	4	usual resident	1377	women_GDHS_14.dta	eastern rural	34	389367		30-34	female		unexposed	eastern	rural	ewe	christianity	none	0	poorest	-94115		no		yes	no	no	no	yes	no		yes, paid by a relative / friend	yes, valid		yes	public/gov't	outpatient	national health insurance	no	yes	yes	yes	good	easy	satisfied	satisfied	satisfied
507	3421 2	GH6	34	21	usual resident	1377	women_GDHS_14.dta	eastern rural	34	389367		25-29	female		unexposed	eastern	rural	ewe	christianity	secondary/higher	7	poorest	-103970		no		yes	no	no	no	yes	no		yes, paid by a relative / friend	yes, valid		yes	public/gov't	outpatient	cash	yes	yes	yes	yes	fair	easy	fairly satisfied	fairly satisfied	not satisfied
508	36 9 1	GH6	36	9	usual resident	1377	women_GDHS_14.dta	central urban	36	1059358		40-44	female		unexposed	central	urban	akan	christianity	secondary/higher	10	richer	70008		no		yes	no	no	no	yes	no		yes, paid myself	yes, valid		yes	public/gov't	outpatient	national health insurance	no	yes	yes	yes	good	easy	satisfied	satisfied	satisfied
509	3616 2	GH6	36	16	usual resident	1377	women_GDHS_14.dta	central urban	36	1059358		25-29	female		unexposed	central	urban	akan	christianity	secondary/higher	12	richest	101044		no		yes	no	no	no	yes	no		yes, paid by a relative / friend	yes, valid		yes	public/gov't	outpatient	national health insurance	no	yes	yes	yes	good	easy	satisfied	fairly satisfied	fairly satisfied
510	3619 2	GH6	36	19	usual resident	1377	women_GDHS_14.dta	central urban	36	1059358		40-44	female		unexposed	central	urban	akan	christianity	secondary/higher	8	middle	5284		no		yes	no	no	no	yes	no		yes, paid myself	yes, valid		yes	public/gov't	outpatient	national health insurance	no	yes	yes	yes	very good	easy	satisfied	satisfied	satisfied
511	3619 3	GH6	36	19	usual resident	1377	women_GDHS_14.dta	central urban	36	1059358		over44	female		unexposed	central	urban	akan	christianity	secondary/higher	7	middle	5284		no		yes	no	no	no	yes	no		yes, paid myself	yes, valid		yes	public/gov't	outpatient	national health insurance	no	yes	yes	yes	good	easy	fairly satisfied	satisfied
512	3620 2	GH6	36	20	usual resident	1377	women_GDHS_14.dta	central urban	36	1059358		40-44	female		unexposed	central	urban	akan	christianity	secondary/higher	9	richer	33546		yes		yes	no	no	no	yes	no		yes, paid by a relative / friend	yes, valid		yes	public/gov't	outpatient	national health insurance	no	yes	yes	yes	very good	easy	fairly satisfied	satisfied	satisfied
513	3624 1	GH6	36	24	usual resident	1377	women_GDHS_14.dta	central urban	36	1059358		over44	female		unexposed	central	urban	akan	christianity	secondary/higher	10	richer	43474		yes		yes	no	no	no	yes	no		yes, paid by a relative / friend	yes, valid		yes	public/gov't	outpatient	national health insurance	no	yes	yes	yes	good	easy	very dissatisfied	not satisfied	satisfied
514	38 3 2	GH6	38	3	usual resident	1378	women_GDHS_14.dta	western urban	38	908656		40-44	female		unexposed	western	urban	akan	christianity	secondary/higher	10	richer	44503		no		yes	no	no	no	yes	no		yes, paid by a relative / friend	yes, valid		yes	public/gov't	outpatient	combination of any of the above	yes	yes	yes	yes	good	difficult	not satisfied	not satisfied	satisfied
515	38 5 2	GH6	38	5	usual resident	1378	women_GDHS_14.dta	western urban	38	908656		40-44	female		unexposed	western	urban	ewe	christianity	none	0	richest	116140		yes		yes	no	no	no	yes	no		yes, paid myself	yes, valid		yes	public/gov't	outpatient	national health insurance	no	yes	yes	yes	fair	easy	fairly satisfied	satisfied	satisfied
516	38 8 1	GH6	38	8	usual resident	1378	women_GDHS_14.dta	western urban	38	908656		40-44	female		unexposed	western	urban	akan	christianity	secondary/higher	11	richest	127130		no		yes	no	no	no	yes	no		yes, paid myself	yes, valid		yes	public/gov't	outpatient	national health insurance	no	yes	yes	yes	good	easy	very dissatisfied		satisfied
517	3810 2	GH6	38	10	usual resident	1378	women_GDHS_14.dta	western urban	38	908656		15-19	female		unexposed	western	urban	akan	christianity	secondary/higher	12	richest	101719		no		yes	no	no	no	yes	no		yes, paid by a relative / friend	yes, valid		yes	public/gov't	outpatient	cash	yes	yes	no	no	very good	very easy	very dissatisfied	not satisfied	not satisfied
518	3817 3	GH6	38	17	usual resident	1377	women_GDHS_14.dta	western urban	38	908656		20-24	female		unexposed	western	urban	akan	christianity	secondary/higher	13	richer	71163		no		yes	no	no	no	yes	no		yes, paid by a relative / friend	yes, valid		yes	public/gov't	outpatient	national health insurance	no	no	yes	yes	very good	very easy	not satisfied	fairly satisfied	fairly satisfied
519	3821 1	GH6	38	21	usual resident	1378	women_GDHS_14.dta	western urban	38	908656		35-39	female		unexposed	western	urban	akan	christianity	secondary/higher	16	richest	150259		yes		yes	no	no	no	yes	no		yes, paid myself	yes, valid		yes	public/gov't	outpatient	cash	yes	yes	yes	yes	good	easy	very satisfied	satisfied	satisfied
520	39 1 2	GH6	39	1	usual resident	1379	women_GDHS_14.dta	northern urban	39	1000962		30-34	female		unexposed	northern	urban	mole_dagbani	islam	primary education	2	richer	50131		no		yes	no	no	no	yes	no		yes, paid by a relative / friend	yes, valid		yes	public/gov't	outpatient	national health insurance	no	yes	no	yes	good	difficult	very dissatisfied	very satisfied
521	39 4 2	GH6	39	4	usual resident	1379	women_GDHS_14.dta	northern urban	39	1000962		20-24	female		unexposed	northern	urban	mole_dagbani	islam	none	0	middle	-12509		no		yes	no	no	no	yes	no		yes, paid by a relative / friend	yes, valid		yes	public/gov't	outpatient	national health insurance	no	no	yes	yes	good	easy	fairly satisfied	satisfied	fairly satisfied
522	39 8 2	GH6	39	8	usual resident	1379	women_GDHS_14.dta	northern urban	39	1000962		30-34	female		unexposed	northern	urban	mole_dagbani	islam	none	0	middle	-4758		no		yes	no	no	no	yes	no		8	yes, valid		yes	public/gov't	outpatient	national health insurance	no	yes	no	yes	good	fairly easy	satisfied	very satisfied
523	3910 2	GH6	39	10	usual resident	1379	women_GDHS_14.dta	northern urban	39	1000962		40-44	female		unexposed	northern	urban	mole_dagbani	islam	none	0	poorest	-129798		no		yes	no	no	no	yes	no		yes, paid by a relative / friend	yes, valid		yes	public/gov't	outpatient	national health insurance	no	yes	no	no	good	easy	fairly satisfied	satisfied	satisfied
524	3915 2	GH6	39	15	usual resident	1379	women_GDHS_14.dta	northern urban	39	1000962		40-44	female		unexposed	northern	urban	mole_dagbani	islam	none	0	poorer	-36962		yes		yes	no	no	no	yes	no		yes, paid by a relative / friend	yes, valid		yes	public/gov't	outpatient	national health insurance	no	yes	no	no	good	fairly easy	satisfied	satisfied	satisfied
525	3921 2	GH6	39	21	usual resident	1379	women_GDHS_14.dta	northern urban	39	1000962		35-39	female		unexposed	northern	urban	mole_dagbani	islam	none	0	poorer	-58650		no		yes	no	no	no	yes	no		yes, paid myself	yes, valid		yes	public/gov't	outpatient	national health insurance	no	no	yes	yes	good	fairly easy	not satisfied	satisfied	fairly satisfied
526	3931 2	GH6	39	31	usual resident	1379	women_GDHS_14.dta	northern urban	39	1000962		30-34	female		unexposed	northern	urban	mole_dagbani	islam	none	0	middle	21365		no		yes	no	no	no	yes	no		yes, paid myself	yes, valid		yes	public/gov't	outpatient	national health insurance	no	yes	yes	yes	good	easy	fairly satisfied	satisfied	satisfied
527	40 3 2	GH6	40	3	usual resident	1377	women_GDHS_14.dta	volta urban	40	592622		20-24	female		unexposed	volta	urban	ewe	christianity	secondary/higher	10	richer	92892		no		yes	no	no	no	yes	no		yes, paid myself	yes, valid		yes	public/gov't	outpatient	national health insurance	no	yes	yes	yes	good	easy	very satisfied	not satisfied
528	4021 1	GH6	40	21	usual resident	1377	women_GDHS_14.dta	volta urban	40	592622		over44	female		unexposed	volta	urban	ewe	christianity	primary education	2	middle	-18704		yes		yes	no	no	no	yes	no		yes, paid myself	yes, valid		yes	private	outpatient	national health insurance	no	no	no	yes	good	easy	very satisfied	very satisfied	very satisfied
529	4027 2	GH6	40	27	usual resident	1377	women_GDHS_14.dta	volta urban	40	592622		30-34	female		unexposed	volta	urban	ewe	christianity	secondary/higher	9	poorer	-25588		no		yes	no	no	no	yes	no		yes, paid myself	yes, valid		yes	public/gov't	outpatient	national health insurance	no	yes	yes	yes	very good	easy	fairly satisfied	fairly satisfied	fairly satisfied
530	4029 1	GH6	40	29	usual resident	1377	women_GDHS_14.dta	volta urban	40	592622		40-44	female		unexposed	volta	urban	ewe	christianity	secondary/higher	8	middle	-12608		no		yes	no	no	no	yes	no		yes, paid myself	yes, valid		yes	public/gov't	outpatient	national health insurance	no	yes	yes	yes	good	easy	satisfied	satisfied	satisfied
531	4029 2	GH6	40	29	usual resident	1377	women_GDHS_14.dta	volta urban	40	592622		20-24	female		unexposed	volta	urban	ewe	christianity	secondary/higher	9	middle	-12608		yes		yes	no	no	no	yes	no		yes, paid myself	yes, valid		yes	public/gov't	outpatient	national health insurance	no	yes	yes	yes	good	fairly easy	satisfied	satisfied	satisfied
532	4032 2	GH6	40	32	usual resident	1377	women_GDHS_14.dta	volta urban	40	592622		35-39	female		unexposed	volta	urban	ewe	christianity	secondary/higher	9	middle	1458		no		yes	no	no	no	yes	no		yes, paid myself	yes, valid		yes	public/gov't	outpatient	cash	yes	yes	yes	yes	good	easy	very satisfied	not satisfied	very satisfied
533	4117 2	GH6	41	17	visitor	1377	women_GDHS_14.dta	central rural	41	968974		15-19	female		unexposed	central	rural	akan	christianity	secondary/higher	9	poorer	-27656		no		yes	no	no	no	yes	no		yes, paid by a relative / friend	yes, valid		yes	public/gov't	outpatient	national health insurance	no	yes	no	yes	good	easy	satisfied	satisfied	satisfied
534	42 6 3	GH6	42	6	usual resident	1378	women_GDHS_14.dta	eastern urban	42	1079209		20-24	female		unexposed	eastern	urban	akan	christianity	secondary/higher	13	richer	66453		no		yes	no	no	no	yes	no		yes, paid by a relative / friend	yes, valid		yes	public/gov't	outpatient	national health insurance	no	no	yes	no	poor	fairly easy	not satisfied	not satisfied	fairly satisfied
535	42 9 1	GH6	42	9	usual resident	1377	women_GDHS_14.dta	eastern urban	42	1079209		35-39	female		unexposed	eastern	urban	akan	christianity	secondary/higher	10	middle	14280		yes		yes	no	no	no	yes	no		yes, paid myself	yes, valid		yes	public/gov't	outpatient	cash	yes	yes	yes	yes	very good	very easy	fairly satisfied	satisfied	fairly satisfied
536	4214 1	GH6	42	14	usual resident	1377	women_GDHS_14.dta	eastern urban	42	1079209		over44	female		unexposed	eastern	urban	akan	christianity	secondary/higher	15	richest	119588		yes		yes	no	no	no	yes	no		yes, paid by a relative / friend	yes, valid		yes	public/gov't	outpatient	national health insurance	no	yes	yes	yes	good	very easy	satisfied	satisfied	satisfied
537	43 8 2	GH6	43	8	usual resident	1379	women_GDHS_14.dta	volta urban	43	1075213		25-29	female		unexposed	volta	urban	ewe	christianity	secondary/higher	7	richer	50305		no		yes	no	no	no	yes	no		yes, paid by a relative / friend	yes, valid		yes	public/gov't	outpatient	national health insurance	no	yes	yes	yes	very good	difficult	not satisfied	fairly satisfied
538	4311 2	GH6	43	11	usual resident	1379	women_GDHS_14.dta	volta urban	43	1075213		30-34	female		unexposed	volta	urban	ewe	christianity	secondary/higher	15	richest	191567		yes		yes	no	no	no	yes	no		yes, paid myself	yes, valid		yes	public/gov't	outpatient	national health insurance	no	no	yes	yes	very good	very easy	very satisfied	very satisfied	very satisfied
539	4323 2	GH6	43	23	usual resident	1379	women_GDHS_14.dta	volta urban	43	1075213		30-34	female		unexposed	volta	urban	ewe	christianity	secondary/higher	12	richer	71523		yes		yes	no	no	no	yes	no		yes, paid by a relative / friend	yes, valid		yes	public/gov't	outpatient	national health insurance	no	yes	yes	yes	good	easy	not satisfied	not satisfied	not satisfied
540	4327 2	GH6	43	27	usual resident	1379	women_GDHS_14.dta	volta urban	43	1075213		30-34	female		unexposed	volta	urban	ewe	christianity	secondary/higher	9	richer	50528		no		yes	no	no	no	yes	no		yes, paid by a relative / friend	yes, valid		yes	public/gov't	outpatient	national health insurance	no	yes	yes	yes	good	fairly easy	not satisfied	satisfied	satisfied
541	4332 2	GH6	43	32	usual resident	1379	women_GDHS_14.dta	volta urban	43	1075213		25-29	female		unexposed	volta	urban	ewe	christianity	secondary/higher	12	middle	-21858		no		yes	no	no	no	yes	no		yes, paid myself	yes, valid		yes	public/gov't	outpatient	cash	yes	yes	yes	yes	fair	fairly easy	very dissatisfied	very dissatisfied	not satisfied
542	44 1 2	GH6	44	1	usual resident	1377	women_GDHS_14.dta	upper east rural	44	1094964		35-39	female		unexposed	upper east	rural	other	islam	none	0	poorest	-192771		no		yes	no	no	no	yes	no		yes, paid by a relative / friend	yes, valid		yes	public/gov't	outpatient	national health insurance	no	yes	yes	yes	good	easy	satisfied	satisfied	satisfied
543	44 2 2	GH6	44	2	usual resident	1377	women_GDHS_14.dta	upper east rural	44	1094964		over44	female		unexposed	upper east	rural	mole_dagbani	islam	none	0	poorest	-86525		no		yes	no	no	no	yes	no		yes, paid myself	yes, valid		yes	public/gov't	outpatient	national health insurance	no	yes	yes	yes	good	easy	satisfied
544	44 5 4	GH6	44	5	usual resident	1377	women_GDHS_14.dta	upper east rural	44	1094964		30-34	female		unexposed	upper east	rural	mole_dagbani	islam	none	0	poorest	-81704		no		yes	no	no	no	yes	no		yes, paid myself	yes, valid		yes	public/gov't	outpatient	national health insurance	no	yes	no	yes	good	easy	satisfied	satisfied	satisfied
545	44 5 8	GH6	44	5	visitor	1377	women_GDHS_14.dta	upper east rural	44	1094964		20-24	female		unexposed	upper east	rural	mole_dagbani	islam	primary education	3	poorest	-81704		no		yes	no	no	no	yes	no		yes, paid myself	yes, valid		yes	public/gov't	outpatient	national health insurance	no	yes	yes	yes	very good	easy	satisfied	satisfied	satisfied
546	44 6 2	GH6	44	6	usual resident	1377	women_GDHS_14.dta	upper east rural	44	1094964		25-29	female		unexposed	upper east	rural	mole_dagbani	islam	none	0	poorer	-34252		no		yes	no	no	no	yes	no		yes, paid by a relative / friend	yes, valid		yes	public/gov't	outpatient	national health insurance	no	yes	yes	yes	good	very easy	satisfied	satisfied	satisfied
547	44 8 2	GH6	44	8	usual resident	1377	women_GDHS_14.dta	upper east rural	44	1094964		25-29	female		unexposed	upper east	rural	mole_dagbani	islam	none	0	middle	1017		no		yes	no	no	no	yes	no		yes, paid myself	yes, valid		yes	public/gov't	outpatient	national health insurance	no	yes	yes	yes	good	easy	satisfied	satisfied	satisfied
548	4430 6	GH6	44	30	usual resident	1377	women_GDHS_14.dta	upper east rural	44	1094964		20-24	female		unexposed	upper east	rural	other	islam	none	0	middle	-14066		no		yes	no	no	no	yes	no		yes, paid by a relative / friend	yes, valid		yes	public/gov't	outpatient	national health insurance	no	yes	yes	yes	good	easy	satisfied	satisfied	fairly satisfied
549	45 3 2	GH6	45	3	usual resident	1378	women_GDHS_14.dta	brong ahafo rural	45	838527		30-34	female		unexposed	brong ahafo	rural	akan	christianity	secondary/higher	9	poorest	-80931		no		yes	no	no	no	yes	no		yes, paid by a relative / friend	yes, valid		yes	public/gov't	outpatient	national health insurance	no	yes	yes	yes	very good	easy	satisfied	satisfied	very dissatisfied
550	4510 2	GH6	45	10	usual resident	1378	women_GDHS_14.dta	brong ahafo rural	45	838527		35-39	female		unexposed	brong ahafo	rural	akan	christianity	primary education	4	poorer	-47029		no		yes	no	no	no	yes	no		no, exempt as indigent	yes, valid		yes	public/gov't	outpatient	cash	yes	yes	yes	yes	very good	easy	satisfied	satisfied	very satisfied
551	4511 2	GH6	45	11	usual resident	1378	women_GDHS_14.dta	brong ahafo rural	45	838527		30-34	female		unexposed	brong ahafo	rural	akan	christianity	secondary/higher	9	middle	12803		no		yes	no	no	no	yes	no		yes, paid by a relative / friend	yes, valid		yes	public/gov't	outpatient	national health insurance	no	yes	yes	yes	very good	easy	satisfied	satisfied	fairly satisfied
552	4513 2	GH6	45	13	usual resident	1378	women_GDHS_14.dta	brong ahafo rural	45	838527		40-44	female		unexposed	brong ahafo	rural	akan	christianity	primary education	0	poorer	-51829		no		yes	no	no	no	yes	no		yes, paid by a relative / friend	yes, valid		yes	public/gov't	outpatient	national health insurance	no	yes	yes	yes	good	fairly easy	satisfied	satisfied
553	4519 2	GH6	45	19	usual resident	1378	women_GDHS_14.dta	brong ahafo rural	45	838527		20-24	female		unexposed	brong ahafo	rural	other	christianity	none	0	poorest	-100173		no		yes	no	no	no	yes	no		yes, paid by a relative / friend	yes, valid		yes	public/gov't	outpatient	national health insurance	no	yes	yes	yes	good	easy	satisfied	satisfied	satisfied
554	4523 1	GH6	45	23	usual resident	1378	women_GDHS_14.dta	brong ahafo rural	45	838527		25-29	female		unexposed	brong ahafo	rural	akan	christianity	secondary/higher	7	poorer	-30771		no		yes	no	no	no	yes	no		yes, paid myself	yes, valid		yes	public/gov't	outpatient	cash	yes	yes	yes	yes	good	very easy	very satisfied	very satisfied	satisfied
555	4529 2	GH6	45	29	usual resident	1378	women_GDHS_14.dta	brong ahafo rural	45	838527		30-34	female		unexposed	brong ahafo	rural	akan	christianity	secondary/higher	12	middle	19765		yes		yes	no	no	no	yes	no		yes, paid myself	yes, valid		yes	public/gov't	outpatient	national health insurance	no	yes	yes	yes	good	easy	very dissatisfied	satisfied	not satisfied
556	4531 2	GH6	45	31	usual resident	1378	women_GDHS_14.dta	brong ahafo rural	45	838527		35-39	female		unexposed	brong ahafo	rural	akan	christianity	primary education	6	middle	8147		no		yes	no	no	no	yes	no		yes, paid by a relative / friend	yes, valid		yes	public/gov't	outpatient	cash	yes	yes	yes	yes	good	very easy	satisfied	fairly satisfied	fairly satisfied
557	46 2 2	GH6	46	2	usual resident	1378	women_GDHS_14.dta	brong ahafo rural	46	603820		20-24	female		unexposed	brong ahafo	rural	other	islam	none	0	poorest	-92525		no		yes	no	no	no	yes	no		yes, paid by a relative / friend	yes, valid		yes	public/gov't	outpatient	national health insurance	no	yes	no	yes	very good	very easy	very satisfied
558	4611 2	GH6	46	11	usual resident	1378	women_GDHS_14.dta	brong ahafo rural	46	603820		30-34	female		unexposed	brong ahafo	rural	mole_dagbani	christianity	none	0	poorer	-72934		no		yes	no	no	no	yes	no		yes, paid myself	yes, valid		yes	public/gov't	outpatient	national health insurance	no	yes	yes	yes	good	very easy	very satisfied	satisfied	satisfied
559	4616 2	GH6	46	16	usual resident	1378	women_GDHS_14.dta	brong ahafo rural	46	603820		25-29	female		unexposed	brong ahafo	rural	other	islam	primary education	5	poorer	-49481		no		yes	no	no	no	yes	no		8	yes, valid		yes	public/gov't	outpatient	national health insurance	no	yes	yes	yes	very good	very easy	very satisfied	very satisfied
560	4620 4	GH6	46	20	usual resident	1378	women_GDHS_14.dta	brong ahafo rural	46	603820		20-24	female		unexposed	brong ahafo	rural	mole_dagbani	christianity	primary education	3	poorer	-57543		no		yes	no	no	no	yes	no		yes, paid by a relative / friend	yes, valid		yes	public/gov't	outpatient	cash	yes	yes	yes	yes	good	very easy	satisfied	very satisfied
561	4623 2	GH6	46	23	usual resident	1378	women_GDHS_14.dta	brong ahafo rural	46	603820		40-44	female		unexposed	brong ahafo	rural	other	christianity	none	0	middle	-20120		no		yes	no	no	no	yes	no		yes, paid by a relative / friend	yes, valid		yes	private	outpatient	national health insurance	no	yes	yes	yes	good	very easy	very satisfied	satisfied	satisfied
562	4624 2	GH6	46	24	usual resident	1378	women_GDHS_14.dta	brong ahafo rural	46	603820		15-19	female		unexposed	brong ahafo	rural	mole_dagbani	christianity	secondary/higher	8	poorer	-54075		no		yes	no	no	no	yes	no		yes, paid by a relative / friend	yes, valid		yes	public/gov't	outpatient	national health insurance	no	yes	no	yes	very good	very easy	satisfied	satisfied	satisfied
563	4625 2	GH6	46	25	usual resident	1378	women_GDHS_14.dta	brong ahafo rural	46	603820		40-44	female		unexposed	brong ahafo	rural	other	islam	primary education	3	poorer	-49106		no		yes	no	no	no	yes	no		yes, paid myself	yes, valid		yes	public/gov't	outpatient	national health insurance	no	no	no	no	good	difficult	very dissatisfied	not satisfied	very dissatisfied
564	4633 1	GH6	46	33	usual resident	1378	women_GDHS_14.dta	brong ahafo rural	46	603820		30-34	female		unexposed	brong ahafo	rural	other	islam	none	0	poorer	-26059		no		yes	no	no	no	yes	no		8	yes, valid		yes	public/gov't	outpatient	national health insurance	no	yes	yes	yes	very good	very easy	very satisfied	very satisfied
565	47 5 1	GH6	47	5	usual resident	1379	women_GDHS_14.dta	volta urban	47	778644		40-44	female		unexposed	volta	urban	ewe	christianity	primary education	6	poorer	-27436		no		yes	no	no	no	yes	no		8	yes, valid		yes	public/gov't	outpatient	national health insurance	no	no	no	yes	good	easy	fairly satisfied	fairly satisfied	fairly satisfied
566	47 5 2	GH6	47	5	usual resident	1379	women_GDHS_14.dta	volta urban	47	778644		15-19	female		unexposed	volta	urban	other	christianity	primary education	6	poorer	-27436		no		yes	no	no	no	yes	no		yes, paid by a relative / friend	yes, valid		yes	public/gov't	outpatient	national health insurance	no	yes	yes	yes	very good	very easy	satisfied	satisfied	very satisfied
567	4724 1	GH6	47	24	usual resident	1379	women_GDHS_14.dta	volta urban	47	778644		30-34	female		unexposed	volta	urban	ewe	christianity	secondary/higher	12	richer	82050		no		yes	no	no	no	yes	no		yes, paid myself	yes, valid		yes	public/gov't	outpatient	national health insurance	no	yes	yes	yes	good	very easy	very satisfied	satisfied	satisfied
568	4726 2	GH6	47	26	usual resident	1379	women_GDHS_14.dta	volta urban	47	778644		20-24	female		unexposed	volta	urban	ewe	christianity	secondary/higher	13	richest	114385		no		yes	no	no	no	yes	no		yes, paid by a relative / friend	yes, valid		yes	private	outpatient	cash	yes	yes	yes	yes	very good	very easy	very satisfied	very satisfied	very satisfied
569	4819 3	GH6	48	19	usual resident	1377	women_GDHS_14.dta	central rural	48	687378		20-24	female		unexposed	central	rural	akan	christianity	secondary/higher	13	middle	27456		no		yes	no	no	no	yes	no		yes, paid by a relative / friend	yes, valid		yes	public/gov't	outpatient	national health insurance	no	yes	yes	yes	good	fairly easy	not satisfied	fairly satisfied	not satisfied
570	4822 3	GH6	48	22	visitor	1377	women_GDHS_14.dta	central rural	48	687378		25-29	female		unexposed	central	rural	akan	christianity	secondary/higher	12	middle	8363		no		yes	no	no	no	yes	no		yes, paid by a relative / friend	yes, valid		yes	public/gov't	outpatient	national health insurance	no	yes	no	yes	good	easy	satisfied	satisfied	satisfied
571	4824 2	GH6	48	24	usual resident	1377	women_GDHS_14.dta	central rural	48	687378		35-39	female		unexposed	central	rural	akan	christianity	primary education	5	poorer	-54355		no		yes	no	no	no	yes	no		yes, paid myself	yes, valid		yes	public/gov't	outpatient	national health insurance	no	yes	yes	yes	good	very easy	fairly satisfied	satisfied	satisfied
572	4832 2	GH6	48	32	usual resident	1377	women_GDHS_14.dta	central rural	48	687378		30-34	female		unexposed	central	rural	akan	christianity	secondary/higher	9	poorer	-39432		no		yes	no	no	no	yes	no		no, other	yes, valid		yes	public/gov't	outpatient	national health insurance	no	yes	no	yes	good	fairly easy	not satisfied	satisfied	fairly satisfied
573	50 1 2	GH6	50	1	usual resident	1379	women_GDHS_14.dta	upper west rural	50	305302		35-39	female		unexposed	upper west	rural	mole_dagbani	christianity	none	0	poorest	-104290		no		yes	no	no	no	yes	no		yes, paid myself	yes, valid		yes	public/gov't	outpatient	national health insurance	no	yes	no	yes	very good	easy	very satisfied
574	50 2 2	GH6	50	2	usual resident	1379	women_GDHS_14.dta	upper west rural	50	305302		30-34	female		unexposed	upper west	rural	mole_dagbani	other	none	0	poorest	-125616		yes		yes	no	no	no	yes	no		yes, paid by a relative / friend	yes, valid		yes	public/gov't	outpatient	national health insurance	no	yes	yes	yes	good	easy	fairly satisfied	fairly satisfied	fairly satisfied
575	50 3 3	GH6	50	3	usual resident	1379	women_GDHS_14.dta	upper west rural	50	305302		25-29	female		unexposed	upper west	rural	mole_dagbani	christianity	none	0	poorest	-116172		no		yes	no	no	no	yes	no		yes, paid by a relative / friend	yes, valid		yes	public/gov't	outpatient	national health insurance	no	yes	yes	yes	good	easy	fairly satisfied	fairly satisfied	fairly satisfied
576	50 6 2	GH6	50	6	usual resident	1379	women_GDHS_14.dta	upper west rural	50	305302		30-34	female		unexposed	upper west	rural	mole_dagbani	other	none	0	poorest	-135021		no		yes	no	no	no	yes	no		yes, paid by a relative / friend	yes, valid		yes	public/gov't	outpatient	national health insurance	no	yes	yes	yes	good	fairly easy	very satisfied
577	5011 4	GH6	50	11	usual resident	1379	women_GDHS_14.dta	upper west rural	50	305302		20-24	female		unexposed	upper west	rural	mole_dagbani	christianity	none	0	poorest	-163762		no		yes	no	no	no	yes	no		yes, paid myself	yes, valid		yes	public/gov't	outpatient	national health insurance	no	yes	yes	yes	good	easy	satisfied	satisfied	satisfied
578	5025 2	GH6	50	25	usual resident	1379	women_GDHS_14.dta	upper west rural	50	305302		30-34	female		unexposed	upper west	rural	mole_dagbani	christianity	none	0	poorest	-93414		no		yes	no	no	no	yes	no		yes, paid by a relative / friend	yes, valid		yes	public/gov't	outpatient	national health insurance	no	yes	yes	yes	fair	easy	satisfied	satisfied	satisfied
579	5028 2	GH6	50	28	usual resident	1379	women_GDHS_14.dta	upper west rural	50	305302		40-44	female		unexposed	upper west	rural	mole_dagbani	other	none	0	poorest	-154103		no		yes	no	no	no	yes	no		yes, paid by a relative / friend	yes, valid		yes	public/gov't	outpatient	national health insurance	no	yes	yes	yes	good	easy	fairly satisfied	fairly satisfied	fairly satisfied
580	5029 2	GH6	50	29	usual resident	1379	women_GDHS_14.dta	upper west rural	50	305302		30-34	female		unexposed	upper west	rural	mole_dagbani	other	primary education	1	poorest	-91030		no		yes	no	no	no	yes	no		yes, paid by a relative / friend	yes, valid		yes	public/gov't	outpatient	national health insurance	no	yes	yes	yes	good	easy	not satisfied	fairly satisfied	not satisfied
581	51 3 2	GH6	51	3	usual resident	1378	women_GDHS_14.dta	brong ahafo rural	51	816885		25-29	female		unexposed	brong ahafo	rural	akan	christianity	primary education	2	poorest	-96975		no		yes	no	no	no	yes	no		yes, paid by a relative / friend	yes, valid		yes	public/gov't	outpatient	national health insurance	no	yes	yes	yes	good	easy	satisfied	satisfied	satisfied
582	5113 2	GH6	51	13	usual resident	1378	women_GDHS_14.dta	brong ahafo rural	51	816885		40-44	female		unexposed	brong ahafo	rural	akan	christianity	none	0	poorest	-132360		no		yes	no	no	no	yes	no		yes, paid by a relative / friend	yes, valid		yes	public/gov't	outpatient	national health insurance	no	yes	yes	yes	good	easy	satisfied	satisfied
583	5122 2	GH6	51	22	usual resident	1378	women_GDHS_14.dta	brong ahafo rural	51	816885		15-19	female		unexposed	brong ahafo	rural	akan	christianity	primary education	2	poorest	-84681		no		yes	no	no	no	yes	no		8	yes, valid		yes	public/gov't	outpatient	national health insurance	no	yes	yes	yes	good	very easy	satisfied	satisfied
584	5126 1	GH6	51	26	usual resident	1378	women_GDHS_14.dta	brong ahafo rural	51	816885		35-39	female		unexposed	brong ahafo	rural	akan	christianity	none	0	poorest	-97316		no		yes	no	no	no	yes	no		yes, paid by a relative / friend	yes, valid		yes	public/gov't	outpatient	national health insurance	no	yes	yes	yes	fair	easy	fairly satisfied
585	52 8 2	GH6	52	8	usual resident	1380	women_GDHS_14.dta	central rural	52	2097306		35-39	female		unexposed	central	rural	akan	christianity	none	0	middle	12333		no		yes	no	no	no	yes	no		8	yes, valid		yes	public/gov't	outpatient	national health insurance	no	yes	yes	yes	poor	very easy	very dissatisfied	very dissatisfied	very dissatisfied
586	5213 2	GH6	52	13	usual resident	1380	women_GDHS_14.dta	central rural	52	2097306		40-44	female		unexposed	central	rural	akan	christianity	secondary/higher	9	middle	25236		no		yes	no	no	no	yes	no		yes, paid by a relative / friend	yes, valid		yes	public/gov't	outpatient	national health insurance	no	yes	no	no	good	fairly easy	satisfied	satisfied	very satisfied
587	5214 2	GH6	52	14	usual resident	1380	women_GDHS_14.dta	central rural	52	2097306		over44	female		unexposed	central	rural	mole_dagbani	islam	none	0	poorer	-62966		no		yes	no	no	no	yes	no		yes, paid by a relative / friend	yes, valid		yes	public/gov't	outpatient	national health insurance	no	yes	yes	yes	good	easy	satisfied	satisfied	satisfied
588	5221 1	GH6	52	21	usual resident	1380	women_GDHS_14.dta	central rural	52	2097306		20-24	female		unexposed	central	rural	akan	christianity	secondary/higher	10	richer	59537		no		yes	no	no	no	yes	no		yes, paid by a relative / friend	yes, valid		yes	public/gov't	outpatient	national health insurance	no	yes	yes	yes	good	easy	satisfied	satisfied	satisfied
589	5226 2	GH6	52	26	usual resident	1380	women_GDHS_14.dta	central rural	52	2097306		25-29	female		unexposed	central	rural	ewe	christianity	primary education	6	middle	-5795		no		yes	no	no	no	yes	no		8	yes, valid		yes	public/gov't	outpatient	national health insurance	no	no	no	yes	good	easy	fairly satisfied	fairly satisfied	fairly satisfied
590	5228 1	GH6	52	28	usual resident	1380	women_GDHS_14.dta	central rural	52	2097306		35-39	female		unexposed	central	rural	akan	christianity	secondary/higher	8	middle	27761		no		yes	no	no	no	yes	no		yes, paid myself	yes, valid		yes	public/gov't	outpatient	national health insurance	no	yes	yes	yes	very good	easy	satisfied	satisfied	satisfied
591	5232 2	GH6	52	32	usual resident	1380	women_GDHS_14.dta	central rural	52	2097306		20-24	female		unexposed	central	rural	akan	christianity	secondary/higher	8	richer	50135		no		yes	no	no	no	yes	no		8	yes, valid		yes	public/gov't	outpatient	national health insurance	no	yes	yes	yes	very good	very easy	very satisfied	very satisfied	very satisfied
592	53 1 2	GH6	53	1	usual resident	1377	women_GDHS_14.dta	western urban	53	1020436		30-34	female		unexposed	western	urban	akan	christianity	secondary/higher	9	richest	109153		no		yes	no	no	no	yes	no		yes, paid by a relative / friend	yes, valid		yes	public/gov't	outpatient	national health insurance	no	yes	yes	yes	fair	fairly easy	fairly satisfied	fairly satisfied	satisfied
593	53 5 1	GH6	53	5	usual resident	1377	women_GDHS_14.dta	western urban	53	1020436		30-34	female		unexposed	western	urban	akan	christianity	secondary/higher	12	richer	56435		no		yes	no	no	no	yes	no		yes, paid by a relative / friend	yes, valid		yes	private	outpatient	cash	yes	yes	yes	yes	fair	easy	very dissatisfied	not satisfied	not satisfied
594	53 6 2	GH6	53	6	usual resident	1377	women_GDHS_14.dta	western urban	53	1020436		25-29	female		unexposed	western	urban	akan	christianity	secondary/higher	9	richer	72772		no		yes	no	no	no	yes	no		yes, paid myself	yes, valid		yes	public/gov't	outpatient	national health insurance	no	yes	yes	yes	very good	very easy	very satisfied	very satisfied	very satisfied
595	5312 2	GH6	53	12	usual resident	1377	women_GDHS_14.dta	western urban	53	1020436		35-39	female		unexposed	western	urban	akan	christianity	secondary/higher	9	richer	56656		no		yes	no	no	no	yes	no		yes, paid by a relative / friend	yes, valid		yes	public/gov't	outpatient	national health insurance	no	yes	yes	yes	very good	very easy	very satisfied	very satisfied	very satisfied
596	5316 2	GH6	53	16	usual resident	1377	women_GDHS_14.dta	western urban	53	1020436		35-39	female		unexposed	western	urban	mole_dagbani	islam	none	0	richer	55328		no		yes	no	no	no	yes	no		yes, paid by a relative / friend	yes, valid		yes	public/gov't	outpatient	cash	yes	no	yes	yes	fair	easy	very dissatisfied	not satisfied	not satisfied
597	5317 1	GH6	53	17	usual resident	1377	women_GDHS_14.dta	western urban	53	1020436		20-24	female		unexposed	western	urban	akan	christianity	secondary/higher	15	richest	136122		no		yes	no	no	no	yes	no		yes, paid by a relative / friend	yes, valid		yes	private	outpatient	cash	yes	yes	yes	yes	very good	very easy	satisfied	satisfied	fairly satisfied
598	5321 2	GH6	53	21	usual resident	1377	women_GDHS_14.dta	western urban	53	1020436		40-44	female		unexposed	western	urban	akan	christianity	secondary/higher	9	richer	86014		no		yes	no	no	no	yes	no		yes, paid by a relative / friend	yes, valid		yes	private	outpatient	national health insurance	no	yes	yes	yes	very good	very easy	satisfied	very satisfied	very satisfied
599	5321 3	GH6	53	21	usual resident	1377	women_GDHS_14.dta	western urban	53	1020436		15-19	female		unexposed	western	urban	akan	christianity	secondary/higher	10	richer	86014		no		yes	no	no	no	yes	no		yes, paid by a relative / friend	yes, valid		yes	public/gov't	outpatient	national health insurance	no	no	no	no	fair	fairly easy	not satisfied
600	5324 2	GH6	53	24	usual resident	1377	women_GDHS_14.dta	western urban	53	1020436		25-29	female		unexposed	western	urban	akan	christianity	secondary/higher	12	richest	105268		no		yes	no	no	no	yes	no		yes, paid by a relative / friend	yes, valid		yes	public/gov't	outpatient	national health insurance	no	yes	yes	yes	good	fairly easy	very satisfied	satisfied	satisfied
601	5332 1	GH6	53	32	usual resident	1377	women_GDHS_14.dta	western urban	53	1020436		35-39	female		unexposed	western	urban	akan	christianity	secondary/higher	8	richest	116433		no		yes	no	no	no	yes	no		yes, paid myself	yes, valid		yes	public/gov't	outpatient	national health insurance	no	yes	yes	yes	good	easy	fairly satisfied	satisfied	satisfied
602	5333 1	GH6	53	33	usual resident	1377	women_GDHS_14.dta	western urban	53	1020436		20-24	female		unexposed	western	urban	akan	christianity	secondary/higher	12	richer	78137		no		yes	no	no	no	yes	no		yes, paid by a relative / friend	yes, valid		yes	private	outpatient	national health insurance	no	yes	yes	yes	very good	easy	fairly satisfied	satisfied	not satisfied
603	54 3 1	GH6	54	3	usual resident	1378	women_GDHS_14.dta	western rural	54	1444774		40-44	female		unexposed	western	rural	akan	christianity	primary education	2	middle	15110		no		yes	no	no	no	yes	no		yes, paid myself	yes, valid		yes	public/gov't	outpatient	national health insurance	no	yes	yes	yes	very good	very easy	very satisfied	very satisfied	very satisfied
604	54 4 1	GH6	54	4	usual resident	1378	women_GDHS_14.dta	western rural	54	1444774		25-29	female		unexposed	western	rural	akan	christianity	secondary/higher	8	middle	3238		no		yes	no	no	no	yes	no		yes, paid myself	yes, valid		yes	private	outpatient	national health insurance	no	yes	yes	yes	fair	easy	fairly satisfied	fairly satisfied	fairly satisfied
605	54 5 1	GH6	54	5	usual resident	1378	women_GDHS_14.dta	western rural	54	1444774		40-44	female		unexposed	western	rural	akan	christianity	secondary/higher	10	middle	-15768		no		yes	no	no	no	yes	no		yes, paid myself	yes, valid		yes	private	outpatient	national health insurance	no	yes	yes	yes	very good	easy	not satisfied	satisfied	satisfied
606	54 5 2	GH6	54	5	usual resident	1378	women_GDHS_14.dta	western rural	54	1444774		15-19	female		unexposed	western	rural	akan	christianity	secondary/higher	10	middle	-15768		no		yes	no	no	no	yes	no		yes, paid by a relative / friend	yes, valid		yes	public/gov't	outpatient	national health insurance	no	yes	yes	yes	very good	easy	very dissatisfied	fairly satisfied	very dissatisfied
607	5411 2	GH6	54	11	usual resident	1378	women_GDHS_14.dta	western rural	54	1444774		25-29	female		unexposed	western	rural	mole_dagbani	christianity	secondary/higher	12	middle	575		no		yes	no	no	no	yes	no		yes, paid by a relative / friend	yes, valid		yes	private	outpatient	combination of any of the above	yes	yes	yes	yes	good	fairly easy	satisfied	fairly satisfied	fairly satisfied
608	5425 1	GH6	54	25	usual resident	1378	women_GDHS_14.dta	western rural	54	1444774		25-29	female		unexposed	western	rural	akan	christianity	none	0	richer	45606		no		yes	no	no	no	yes	no		no, other	yes, valid		yes	private	outpatient	national health insurance	no	yes	yes	yes	good	very easy	fairly satisfied	satisfied	fairly satisfied
609	5431 2	GH6	54	31	usual resident	1378	women_GDHS_14.dta	western rural	54	1444774		20-24	female		unexposed	western	rural	akan	christianity	secondary/higher	13	middle	13587		no		yes	no	no	no	yes	no		yes, paid myself	yes, valid		yes	private	outpatient	national health insurance	no	yes	yes	yes	good	very easy	not satisfied	not satisfied	not satisfied
610	55 1 2	GH6	55	1	usual resident	1379	women_GDHS_14.dta	volta rural	55	862238		30-34	female		unexposed	volta	rural	ewe	christianity	none	0	poorer	-34696		yes		yes	no	no	no	yes	no		yes, paid myself	yes, valid		yes	public/gov't	outpatient	national health insurance	no	yes	yes	yes	very good	very easy	very satisfied	very satisfied
611	55 8 2	GH6	55	8	usual resident	1379	women_GDHS_14.dta	volta rural	55	862238		30-34	female		unexposed	volta	rural	ewe	christianity	primary education	5	poorer	-45794		no		yes	no	no	no	yes	no		8	yes, valid		yes	public/gov't	outpatient	national health insurance	no	yes	yes	yes	very good	easy	not satisfied	not satisfied	fairly satisfied
612	55 9 1	GH6	55	9	usual resident	1379	women_GDHS_14.dta	volta rural	55	862238		35-39	female		unexposed	volta	rural	ewe	christianity	secondary/higher	7	poorer	-57226		yes		yes	no	no	no	yes	no		yes, paid by a relative / friend	yes, valid		yes	public/gov't	outpatient	national health insurance	no	yes	yes	yes	good	easy	very dissatisfied	not satisfied	not satisfied
613	5514 3	GH6	55	14	usual resident	1379	women_GDHS_14.dta	volta rural	55	862238		25-29	female		unexposed	volta	rural	ewe	christianity	secondary/higher	9	poorest	-87056		no		yes	no	no	no	yes	no		8	yes, valid		yes	public/gov't	outpatient	national health insurance	no	yes	yes	yes	good	very easy	fairly satisfied	satisfied
614	5515 2	GH6	55	15	usual resident	1379	women_GDHS_14.dta	volta rural	55	862238		20-24	female		unexposed	volta	rural	ewe	christianity	secondary/higher	7	poorer	-54538		no		yes	no	no	no	yes	no		yes, paid myself	yes, valid		yes	public/gov't	outpatient	national health insurance	no	yes	yes	yes	good	very easy	satisfied	satisfied	satisfied
615	5517 2	GH6	55	17	usual resident	1379	women_GDHS_14.dta	volta rural	55	862238		over44	female		unexposed	volta	rural	ewe	christianity	primary education	3	poorest	-85548		no		yes	no	no	no	yes	no		yes, paid myself	yes, valid		yes	public/gov't	outpatient	national health insurance	no	yes	yes	yes	good	very easy	very satisfied	very satisfied
616	5520 2	GH6	55	20	usual resident	1379	women_GDHS_14.dta	volta rural	55	862238		30-34	female		unexposed	volta	rural	ewe	christianity	primary education	5	middle	1050		no		yes	no	no	no	yes	no		yes, paid by a relative / friend	yes, valid		yes	public/gov't	outpatient	national health insurance	no	yes	yes	yes	good	easy	fairly satisfied	satisfied	satisfied
617	5524 2	GH6	55	24	usual resident	1379	women_GDHS_14.dta	volta rural	55	862238		35-39	female		unexposed	volta	rural	ewe	christianity	secondary/higher	9	poorer	-54455		no		yes	no	no	no	yes	no		yes, paid myself	yes, valid		yes	public/gov't	outpatient	national health insurance	no	yes	yes	yes	good	very easy	very satisfied	very satisfied
618	5526 2	GH6	55	26	usual resident	1379	women_GDHS_14.dta	volta rural	55	862238		35-39	female		unexposed	volta	rural	ewe	christianity	none	0	poorer	-61839		no		yes	no	no	no	yes	no		yes, paid myself	yes, valid		yes	public/gov't	outpatient	national health insurance	no	yes	yes	yes	very good	easy	very satisfied	very satisfied
619	5527 2	GH6	55	27	usual resident	1379	women_GDHS_14.dta	volta rural	55	862238		over44	female		unexposed	volta	rural	ewe	christianity	secondary/higher	8	poorer	-43340		no		yes	no	no	no	yes	no		yes, paid by a relative / friend	yes, valid		yes	public/gov't	outpatient	national health insurance	no	yes	yes	yes	good	difficult	very dissatisfied	fairly satisfied	not satisfied
620	5633 7	GH6	56	33	visitor	1377	women_GDHS_14.dta	central rural	56	709850		25-29	female		unexposed	central	rural	akan	christianity	secondary/higher	8	poorer	-27148		no		yes	no	no	no	yes	no		yes, paid by a relative / friend	yes, valid		yes	private	outpatient	national health insurance	no	yes	yes	yes	fair	easy	fairly satisfied	fairly satisfied	fairly satisfied
621	57 3 2	GH6	57	3	usual resident	1380	women_GDHS_14.dta	eastern rural	57	953175		25-29	female		unexposed	eastern	rural	ewe	christianity	secondary/higher	7	richer	48217		no		yes	no	no	no	yes	no		yes, paid myself	yes, valid		yes	public/gov't	outpatient	national health insurance	no	yes	yes	yes	very good	very easy	satisfied
622	58 6 2	GH6	58	6	usual resident	1377	women_GDHS_14.dta	upper west urban	58	147687		25-29	female		unexposed	upper west	urban	mole_dagbani	islam	none	0	richer	84580		no		yes	no	no	no	yes	no		yes, paid by a relative / friend	yes, valid		yes	public/gov't	outpatient	national health insurance	no	yes	yes	yes	good	easy	fairly satisfied	satisfied	fairly satisfied
623	5815 2	GH6	58	15	usual resident	1377	women_GDHS_14.dta	upper west urban	58	147687		35-39	female		unexposed	upper west	urban	mole_dagbani	islam	secondary/higher	9	richest	138876		no		yes	no	no	no	yes	no		yes, paid myself	yes, valid		yes	public/gov't	outpatient	national health insurance	no	yes	yes	yes	good	easy	fairly satisfied	satisfied	satisfied
624	5825 3	GH6	58	25	usual resident	1377	women_GDHS_14.dta	upper west urban	58	147687		15-19	female		unexposed	upper west	urban	other	christianity	secondary/higher	11	richer	89453		no		yes	no	no	no	yes	no		yes, paid by a relative / friend	yes, valid		yes	public/gov't	outpatient	national health insurance	no	yes	no	yes	poor	fairly easy	fairly satisfied	satisfied	satisfied
625	5827 2	GH6	58	27	usual resident	1377	women_GDHS_14.dta	upper west urban	58	147687		30-34	female		unexposed	upper west	urban	mole_dagbani	islam	secondary/higher	9	richer	70436		no		yes	no	no	no	yes	no		yes, paid by a relative / friend	yes, valid		yes	public/gov't	outpatient	national health insurance	no	yes	yes	no	fair	easy	not satisfied	satisfied	not satisfied
626	5831 2	GH6	58	31	usual resident	1377	women_GDHS_14.dta	upper west urban	58	147687		25-29	female		unexposed	upper west	urban	mole_dagbani	islam	secondary/higher	16	richest	151793		no		yes	no	no	no	yes	no		yes, paid by employer/ssnit	yes, valid		yes	public/gov't	outpatient	national health insurance	no	yes	yes	yes	good	easy	satisfied	satisfied	satisfied
627	59 5 1	GH6	59	5	usual resident	1378	women_GDHS_14.dta	brong ahafo rural	59	591256		over44	female		unexposed	brong ahafo	rural	akan	christianity	primary education	2	poorer	-57754		yes		yes	no	no	no	yes	no		yes, paid by a relative / friend	yes, valid		yes	public/gov't	outpatient	national health insurance	no	yes	yes	yes	very good	very easy	satisfied	satisfied	fairly satisfied
628	59 8 2	GH6	59	8	usual resident	1378	women_GDHS_14.dta	brong ahafo rural	59	591256		35-39	female		unexposed	brong ahafo	rural	akan	christianity	secondary/higher	10	poorest	-93059		no		yes	no	no	no	yes	no		yes, paid myself	yes, valid		yes	private	outpatient	national health insurance	no	yes	yes	yes	good	easy	satisfied	fairly satisfied	fairly satisfied
629	5912 1	GH6	59	12	usual resident	1378	women_GDHS_14.dta	brong ahafo rural	59	591256		40-44	female		unexposed	brong ahafo	rural	akan	christianity	secondary/higher	10	poorer	-47144		no		yes	no	no	no	yes	no		yes, paid myself	yes, valid		yes	private	outpatient	national health insurance	no	yes	yes	yes	good	very easy	satisfied	satisfied	satisfied
630	5913 2	GH6	59	13	usual resident	1378	women_GDHS_14.dta	brong ahafo rural	59	591256		35-39	female		unexposed	brong ahafo	rural	akan	christianity	secondary/higher	9	poorer	-73186		no		yes	no	no	no	yes	no		yes, paid by a relative / friend	yes, valid		yes	private	outpatient	national health insurance	no	yes	yes	yes	good	easy	satisfied	satisfied
631	5918 1	GH6	59	18	usual resident	1378	women_GDHS_14.dta	brong ahafo rural	59	591256		20-24	female		unexposed	brong ahafo	rural	akan	christianity	none	0	poorer	-49932		no		yes	no	no	no	yes	no		yes, paid myself	yes, valid		yes	public/gov't	outpatient	national health insurance	no	yes	yes	yes	very good	very easy	very satisfied	satisfied	satisfied
632	5919 3	GH6	59	19	usual resident	1378	women_GDHS_14.dta	brong ahafo rural	59	591256		20-24	female		unexposed	brong ahafo	rural	akan	christianity	secondary/higher	9	poorest	-93230		no		yes	no	no	no	yes	no		yes, paid by a relative / friend	yes, valid		yes	private	outpatient	national health insurance	no	yes	yes	yes	good	easy	satisfied	satisfied	satisfied
633	5920 1	GH6	59	20	usual resident	1378	women_GDHS_14.dta	brong ahafo rural	59	591256		30-34	female		unexposed	brong ahafo	rural	other	islam	secondary/higher	8	poorer	-50837		no		yes	no	no	no	yes	no		yes, paid by a relative / friend	yes, valid		yes	private	outpatient	national health insurance	no	yes	yes	yes	very good	very easy	satisfied	satisfied	fairly satisfied
634	5923 1	GH6	59	23	usual resident	1378	women_GDHS_14.dta	brong ahafo rural	59	591256		30-34	female		unexposed	brong ahafo	rural	akan	christianity	secondary/higher	9	poorer	-35130		no		yes	no	no	no	yes	no		yes, paid myself	yes, valid		yes	public/gov't	outpatient	national health insurance	no	yes	yes	yes	good	very easy	very satisfied	satisfied	satisfied
635	5926 2	GH6	59	26	usual resident	1378	women_GDHS_14.dta	brong ahafo rural	59	591256		20-24	female		unexposed	brong ahafo	rural	akan	christianity	secondary/higher	12	poorer	-32912		no		yes	no	no	no	yes	no		yes, paid by a relative / friend	yes, valid		yes	public/gov't	outpatient	cash	yes	yes	yes	yes	very good	very easy	very satisfied	satisfied	satisfied
636	5929 2	GH6	59	29	usual resident	1378	women_GDHS_14.dta	brong ahafo rural	59	591256		15-19	female		unexposed	brong ahafo	rural	akan	christianity	primary education	5	poorer	-48539		no		yes	no	no	no	yes	no		yes, paid by a relative / friend	yes, valid		yes	private	outpatient	national health insurance	no	yes	yes	yes	good	easy	satisfied	satisfied	satisfied
637	60 2 1	GH6	60	2	usual resident	1379	women_GDHS_14.dta	ashanti urban	60	2560074		35-39	female		exposed	ashanti	urban	akan	christianity	secondary/higher	9	richer	33519		no		yes	no	no	no	yes	no		yes, paid by a relative / friend	yes, valid		yes	public/gov't	outpatient	national health insurance	no	yes	yes	yes	good	easy	not satisfied	fairly satisfied	very satisfied
638	60 6 3	GH6	60	6	visitor	1379	women_GDHS_14.dta	ashanti urban	60	2560074		30-34	female		exposed	ashanti	urban	akan	christianity	secondary/higher	9	richer	70188		no		yes	no	no	no	yes	no		yes, paid by a relative / friend	yes, valid		yes	public/gov't	outpatient	national health insurance	no	yes	yes	yes	very good	very easy	satisfied	satisfied	fairly satisfied
639	6020 2	GH6	60	20	usual resident	1379	women_GDHS_14.dta	ashanti urban	60	2560074		35-39	female		exposed	ashanti	urban	akan	christianity	none	0	richer	42576		no		yes	no	no	no	yes	no		yes, paid by a relative / friend	yes, valid		yes	public/gov't	outpatient	combination of any of the above	yes	yes	yes	yes	good	very easy	satisfied	satisfied	fairly satisfied
640	6022 3	GH6	60	22	usual resident	1379	women_GDHS_14.dta	ashanti urban	60	2560074		15-19	female		exposed	ashanti	urban	other	islam	secondary/higher	9	richer	62432		no		yes	no	no	no	yes	no		yes, paid by a relative / friend	yes, valid		yes	public/gov't	outpatient	national health insurance	no	yes	yes	no	very good	very easy	satisfied	satisfied	very satisfied
641	6024 2	GH6	60	24	usual resident	1379	women_GDHS_14.dta	ashanti urban	60	2560074		25-29	female		exposed	ashanti	urban	mole_dagbani	christianity	primary education	5	richest	97260		no		yes	no	no	no	yes	no		yes, paid myself	yes, valid		yes	public/gov't	outpatient	national health insurance	no	yes	yes	yes	very good	easy	satisfied	very satisfied
642	6027 1	GH6	60	27	usual resident	1379	women_GDHS_14.dta	ashanti urban	60	2560074		40-44	female		exposed	ashanti	urban	akan	islam	secondary/higher	9	middle	6807		no		yes	no	no	no	yes	no		yes, paid myself	yes, valid		yes	public/gov't	outpatient	national health insurance	no	yes	yes	yes	good	easy	not satisfied	satisfied	very satisfied
643	6032 2	GH6	60	32	usual resident	1379	women_GDHS_14.dta	ashanti urban	60	2560074		30-34	female		exposed	ashanti	urban	akan	christianity	secondary/higher	9	richest	160643		no		yes	no	no	no	yes	no		yes, paid by a relative / friend	yes, valid		yes	public/gov't	outpatient	national health insurance	no	yes	yes	yes	very good	very easy	very satisfied	very satisfied
644	61 2 4	GH6	61	2	usual resident	1379	women_GDHS_14.dta	upper west rural	61	171753		15-19	female		unexposed	upper west	rural	mole_dagbani	christianity	secondary/higher	7	poorest	-183418		no		yes	no	no	no	yes	no		yes, paid by a relative / friend	yes, valid		yes	public/gov't	outpatient	combination of any of the above	yes	yes	yes	yes	good	easy	satisfied	satisfied	fairly satisfied
645	61 9 2	GH6	61	9	usual resident	1379	women_GDHS_14.dta	upper west rural	61	171753		20-24	female		unexposed	upper west	rural	mole_dagbani	christianity	none	0	poorest	-128142		no		yes	no	no	no	yes	no		yes, paid by a relative / friend	yes, valid		yes	public/gov't	outpatient	national health insurance	no	yes	yes	yes	good	easy	fairly satisfied	satisfied	satisfied
646	6114 2	GH6	61	14	usual resident	1379	women_GDHS_14.dta	upper west rural	61	171753		20-24	female		unexposed	upper west	rural	mole_dagbani	christianity	none	0	poorest	-127288		no		yes	no	no	no	yes	no		yes, paid myself	yes, valid		yes	public/gov't	outpatient	national health insurance	no	yes	yes	yes	good	easy	satisfied	satisfied	satisfied
647	6120 2	GH6	61	20	usual resident	1379	women_GDHS_14.dta	upper west rural	61	171753		40-44	female		unexposed	upper west	rural	mole_dagbani	other	none	0	poorest	-188059		no		yes	no	no	no	yes	no		yes, paid myself	yes, valid		yes	public/gov't	outpatient	national health insurance	no	yes	yes	yes	good	easy	satisfied	fairly satisfied	fairly satisfied
648	6125 2	GH6	61	25	usual resident	1379	women_GDHS_14.dta	upper west rural	61	171753		40-44	female		unexposed	upper west	rural	mole_dagbani	other	none	0	poorest	-142286		yes		yes	no	no	no	yes	no		yes, paid myself	yes, valid		yes	public/gov't	outpatient	national health insurance	no	yes	yes	yes	good	easy	fairly satisfied	satisfied	satisfied
649	6130 1	GH6	61	30	usual resident	1379	women_GDHS_14.dta	upper west rural	61	171753		40-44	female		unexposed	upper west	rural	mole_dagbani	christianity	primary education	4	poorest	-115083		no		yes	no	no	no	yes	no		yes, paid myself	yes, valid		yes	public/gov't	outpatient	national health insurance	no	yes	yes	yes	good	easy	fairly satisfied	satisfied	satisfied
650	6133 3	GH6	61	33	usual resident	1379	women_GDHS_14.dta	upper west rural	61	171753		25-29	female		unexposed	upper west	rural	mole_dagbani	christianity	none	0	poorest	-141891		no		yes	no	no	no	yes	no		yes, paid myself	yes, valid		yes	public/gov't	outpatient	national health insurance	no	yes	yes	yes	good	easy	fairly satisfied	satisfied	satisfied
651	62 3 2	GH6	62	3	usual resident	1379	women_GDHS_14.dta	northern rural	62	645810		30-34	female		unexposed	northern	rural	other	islam	secondary/higher	8	poorest	-173888		no		yes	no	no	no	yes	no		yes, paid by a relative / friend	yes, valid		yes	public/gov't	outpatient	national health insurance	no	yes	yes	yes	good	very easy	satisfied	satisfied	satisfied
652	6213 4	GH6	62	13	usual resident	1379	women_GDHS_14.dta	northern rural	62	645810		over44	female		unexposed	northern	rural	mole_dagbani	islam	none	0	poorest	-131131		no		yes	no	no	no	yes	no		yes, paid by a relative / friend	yes, valid		yes	public/gov't	outpatient	national health insurance	no	yes	yes	yes	very good	very easy	very satisfied	very satisfied
653	6216 2	GH6	62	16	usual resident	1379	women_GDHS_14.dta	northern rural	62	645810		35-39	female		unexposed	northern	rural	other	islam	none	0	poorest	-102934		no		yes	no	no	no	yes	no		yes, paid myself	yes, valid		yes	public/gov't	outpatient	national health insurance	no	yes	yes	yes	good	very easy	very satisfied	very satisfied	very satisfied
654	6216 3	GH6	62	16	usual resident	1378	women_GDHS_14.dta	northern rural	62	645810		20-24	female		unexposed	northern	rural	other	islam	secondary/higher	11	poorest	-102934		no		yes	no	no	no	yes	no		yes, paid by a relative / friend	yes, valid		yes	public/gov't	outpatient	national health insurance	no	yes	yes	yes	very good	very easy	fairly satisfied	fairly satisfied	fairly satisfied
655	6217 2	GH6	62	17	usual resident	1378	women_GDHS_14.dta	northern rural	62	645810		30-34	female		unexposed	northern	rural	other	islam	secondary/higher	7	poorest	-108867		no		yes	no	no	no	yes	no		yes, paid by a relative / friend	yes, valid		yes	public/gov't	outpatient	national health insurance	no	yes	yes	yes	very good	very easy	very satisfied	very satisfied	very satisfied
656	6223 2	GH6	62	23	usual resident	1378	women_GDHS_14.dta	northern rural	62	645810		over44	female		unexposed	northern	rural	other	islam	none	0	poorest	-91912		no		yes	no	no	no	yes	no		yes, paid myself	yes, valid		yes	public/gov't	outpatient	national health insurance	no	yes	yes	yes	very good	very easy	satisfied	satisfied	satisfied
657	6231 2	GH6	62	31	usual resident	1379	women_GDHS_14.dta	northern rural	62	645810		25-29	female		unexposed	northern	rural	other	islam	none	0	poorest	-89081		no		yes	no	no	no	yes	no		yes, paid by a relative / friend	yes, valid		yes	public/gov't	outpatient	national health insurance	no	yes	no	yes	very good	very easy	very satisfied	very satisfied	very satisfied
658	6233 2	GH6	62	33	usual resident	1379	women_GDHS_14.dta	northern rural	62	645810		35-39	female		unexposed	northern	rural	other	islam	primary education	4	poorest	-102608		no		yes	no	no	no	yes	no		yes, paid by a relative / friend	yes, valid		yes	public/gov't	outpatient	national health insurance	no	yes	yes	yes	very good	very easy	satisfied	satisfied	satisfied
659	6311 2	GH6	63	11	visitor	1377	women_GDHS_14.dta	western rural	63	788670		30-34	female		unexposed	western	rural	ewe	christianity	primary education	6	middle	56		yes		yes	no	no	no	yes	no		yes, paid myself	yes, valid		yes	private	outpatient	national health insurance	no	yes	yes	yes	good	easy	satisfied	satisfied	satisfied
660	64 9 2	GH6	64	9	usual resident	1378	women_GDHS_14.dta	upper east urban	64	326104		25-29	female		unexposed	upper east	urban	other	islam	primary education	4	middle	-9497		no		yes	no	no	no	yes	no		yes, paid by a relative / friend	yes, valid		yes	public/gov't	outpatient	national health insurance	no	yes	yes	yes	good	easy	satisfied
661	6410 2	GH6	64	10	usual resident	1378	women_GDHS_14.dta	upper east urban	64	326104		30-34	female		unexposed	upper east	urban	mole_dagbani	islam	none	0	richer	51201		no		yes	no	no	no	yes	no		yes, paid by a relative / friend	yes, valid		yes	private	outpatient	national health insurance	no	yes	yes	yes	good	easy	satisfied
662	6411 3	GH6	64	11	usual resident	1378	women_GDHS_14.dta	upper east urban	64	326104		15-19	female		unexposed	upper east	urban	mole_dagbani	islam	secondary/higher	10	richest	105845		no		yes	no	no	no	yes	no		yes, paid by a relative / friend	yes, valid		yes	public/gov't	outpatient	national health insurance	no	yes	yes	yes	good	easy	satisfied	satisfied	satisfied
663	6412 2	GH6	64	12	usual resident	1378	women_GDHS_14.dta	upper east urban	64	326104		25-29	female		unexposed	upper east	urban	mole_dagbani	islam	primary education	6	poorest	-169031		no		yes	no	no	no	yes	no		yes, paid by a relative / friend	yes, valid		yes	public/gov't	outpatient	national health insurance	no	yes	yes	yes	good	easy	satisfied	satisfied	satisfied
664	6414 2	GH6	64	14	usual resident	1378	women_GDHS_14.dta	upper east urban	64	326104		25-29	female		unexposed	upper east	urban	mole_dagbani	islam	secondary/higher	7	richest	112845		no		yes	no	no	no	yes	no		yes, paid by a relative / friend	yes, valid		yes	public/gov't	outpatient	national health insurance	no	yes	yes	yes	very good	very easy	very satisfied	very satisfied	satisfied
665	6418 1	GH6	64	18	usual resident	1378	women_GDHS_14.dta	upper east urban	64	326104		over44	female		unexposed	upper east	urban	mole_dagbani	islam	none	0	richer	67392		yes		yes	no	no	no	yes	no		yes, paid myself	yes, valid		yes	public/gov't	outpatient	national health insurance	no	yes	yes	yes	very good	very easy	very satisfied	very satisfied	satisfied
666	6419 2	GH6	64	19	usual resident	1378	women_GDHS_14.dta	upper east urban	64	326104		25-29	female		unexposed	upper east	urban	other	islam	primary education	3	richer	56840		no		yes	no	no	no	yes	no		yes, paid myself	yes, valid		yes	public/gov't	outpatient	national health insurance	no	yes	yes	yes	very good	very easy	satisfied	satisfied	satisfied
667	6430 4	GH6	64	30	usual resident	1378	women_GDHS_14.dta	upper east urban	64	326104		25-29	female		unexposed	upper east	urban	other	islam	secondary/higher	14	richest	123497		no		yes	no	no	no	yes	no		yes, paid by a relative / friend	yes, valid		yes	public/gov't	outpatient	national health insurance	no	no	yes	yes	good	easy	satisfied	satisfied	satisfied
668	65 4 3	GH6	65	4	usual resident	1377	women_GDHS_14.dta	brong ahafo urban	65	539643		15-19	female		unexposed	brong ahafo	urban	akan	islam	primary education	5	poorest	-150683		no		yes	no	no	no	yes	no		yes, paid by a relative / friend	yes, valid		yes	public/gov't	outpatient	cash	yes	yes	yes	yes	good	easy	satisfied	satisfied	satisfied
669	65 9 2	GH6	65	9	usual resident	1377	women_GDHS_14.dta	brong ahafo urban	65	539643		25-29	female		unexposed	brong ahafo	urban	akan	islam	primary education	6	middle	15411		no		yes	no	no	no	yes	no		yes, paid by a relative / friend	yes, valid		yes	public/gov't	outpatient	national health insurance	no	yes	yes	yes	very good	very easy	satisfied	satisfied	very satisfied
670	6510 1	GH6	65	10	usual resident	1377	women_GDHS_14.dta	brong ahafo urban	65	539643		25-29	female		unexposed	brong ahafo	urban	akan	christianity	secondary/higher	14	richest	120464		no		yes	no	no	no	yes	no		yes, paid by employer/ssnit	yes, valid		yes	public/gov't	outpatient	national health insurance	no	yes	yes	yes	good	easy	fairly satisfied	satisfied	not satisfied
671	6514 2	GH6	65	14	usual resident	1377	women_GDHS_14.dta	brong ahafo urban	65	539643		25-29	female		unexposed	brong ahafo	urban	akan	islam	none	0	poorest	-98568		no		yes	no	no	no	yes	no		yes, paid by a relative / friend	yes, valid		yes	public/gov't	outpatient	national health insurance	no	yes	yes	yes	fair	fairly easy	not satisfied	fairly satisfied	satisfied
672	6517 1	GH6	65	17	usual resident	1377	women_GDHS_14.dta	brong ahafo urban	65	539643		30-34	female		unexposed	brong ahafo	urban	akan	islam	none	0	poorer	-34060		no		yes	no	no	no	yes	no		yes, paid by a relative / friend	yes, valid		yes	public/gov't	outpatient	national health insurance	no	yes	yes	yes	very good	very easy	satisfied	satisfied	fairly satisfied
673	6521 1	GH6	65	21	usual resident	1377	women_GDHS_14.dta	brong ahafo urban	65	539643		35-39	female		unexposed	brong ahafo	urban	akan	islam	none	0	poorest	-98501		no		yes	no	no	no	yes	no		yes, paid by a relative / friend	yes, valid		yes	public/gov't	outpatient	national health insurance	no	yes	yes	yes	very good	very easy	satisfied	satisfied	satisfied
674	6524 2	GH6	65	24	usual resident	1377	women_GDHS_14.dta	brong ahafo urban	65	539643		20-24	female		unexposed	brong ahafo	urban	akan	islam	primary education	5	poorest	-120407		no		yes	no	no	no	yes	no		yes, paid myself	yes, valid		yes	public/gov't	outpatient	national health insurance	no	yes	yes	yes	very good	very easy	very satisfied	satisfied	satisfied
675	6531 2	GH6	65	31	usual resident	1377	women_GDHS_14.dta	brong ahafo urban	65	539643		15-19	female		unexposed	brong ahafo	urban	akan	islam	primary education	3	poorest	-93359		no		yes	no	no	no	yes	no		8	yes, valid		yes	public/gov't	outpatient	national health insurance	no	yes	yes	yes	very good	very easy	satisfied	satisfied	satisfied
676	6532 1	GH6	65	32	usual resident	1377	women_GDHS_14.dta	brong ahafo urban	65	539643		20-24	female		unexposed	brong ahafo	urban	mole_dagbani	islam	none	0	poorest	-73863		no		yes	no	no	no	yes	no		yes, paid by a relative / friend	yes, valid		yes	public/gov't	outpatient	national health insurance	no	yes	yes	yes	very good	easy	satisfied	satisfied	fairly satisfied
677	6533 2	GH6	65	33	usual resident	1377	women_GDHS_14.dta	brong ahafo urban	65	539643		25-29	female		unexposed	brong ahafo	urban	akan	islam	primary education	3	poorer	-46460		no		yes	no	no	no	yes	no		8	yes, valid		yes	public/gov't	outpatient	national health insurance	no	yes	yes	yes	good	easy	satisfied	satisfied	satisfied
678	66 4 2	GH6	66	4	usual resident	1377	women_GDHS_14.dta	western urban	66	590872		25-29	female		unexposed	western	urban	akan	christianity	secondary/higher	7	richest	107804		no		yes	no	no	no	yes	no		yes, paid by a relative / friend	yes, valid		yes	public/gov't	outpatient	cash	yes	yes	yes	yes	good	fairly easy	satisfied	satisfied	satisfied
679	6623 2	GH6	66	23	usual resident	1377	women_GDHS_14.dta	western urban	66	590872		30-34	female		unexposed	western	urban	akan	christianity	secondary/higher	8	richest	100430		no		yes	no	no	no	yes	no		8	yes, valid		yes	public/gov't	outpatient	national health insurance	no	yes	yes	yes	good	very easy	satisfied	satisfied	very satisfied
680	6624 1	GH6	66	24	usual resident	1377	women_GDHS_14.dta	western urban	66	590872		20-24	female		unexposed	western	urban	akan	other	primary education	5	middle	6032		no		yes	no	no	no	yes	no		yes, paid by a relative / friend	yes, valid		yes	public/gov't	outpatient	national health insurance	no	yes	yes	yes	good	easy	satisfied	satisfied	satisfied
681	6629 1	GH6	66	29	usual resident	1377	women_GDHS_14.dta	western urban	66	590872		20-24	female		unexposed	western	urban	akan	christianity	secondary/higher	9	richer	48813		no		yes	no	no	no	yes	no		no, other	yes, valid		yes	public/gov't	outpatient	national health insurance	no	yes	yes	yes	good	easy	satisfied	satisfied	satisfied
682	67 1 2	GH6	67	1	usual resident	1379	women_GDHS_14.dta	eastern rural	67	838636		35-39	female		unexposed	eastern	rural	akan	christianity	primary education	4	middle	-12935		no		yes	no	no	no	yes	no		yes, paid by a relative / friend	yes, valid		yes	public/gov't	outpatient	national health insurance	no	no	yes	no	good	fairly easy	very dissatisfied	very dissatisfied	very dissatisfied
683	67 2 1	GH6	67	2	usual resident	1379	women_GDHS_14.dta	eastern rural	67	838636		30-34	female		unexposed	eastern	rural	akan	christianity	secondary/higher	7	middle	19003		no		yes	no	no	no	yes	no		8	yes, valid		yes	public/gov't	outpatient	national health insurance	no	yes	yes	yes	very good	very easy	not satisfied	not satisfied	satisfied
684	67 6 2	GH6	67	6	usual resident	1379	women_GDHS_14.dta	eastern rural	67	838636		20-24	female		unexposed	eastern	rural	akan	christianity	secondary/higher	9	poorer	-37090		no		yes	no	no	no	yes	no		8	yes, valid		yes	private	outpatient	national health insurance	no	yes	yes	yes	very good	very easy	satisfied	satisfied	not satisfied
685	6711 1	GH6	67	11	usual resident	1379	women_GDHS_14.dta	eastern rural	67	838636		30-34	female		unexposed	eastern	rural	akan	christianity	secondary/higher	9	middle	-11220		no		yes	no	no	no	yes	no		8	yes, valid		yes	public/gov't	outpatient	national health insurance	no	yes	yes	yes	very good	very easy	very satisfied	fairly satisfied	not satisfied
686	69 7 5	GH6	69	7	usual resident	1380	women_GDHS_14.dta	ashanti urban	69	1644492		20-24	female		exposed	ashanti	urban	akan	christianity	secondary/higher	13	richest	105484		no		yes	no	no	no	yes	no		yes, paid myself	yes, valid		yes	private	outpatient	combination of any of the above	yes	yes	yes	yes	good	easy	satisfied	satisfied	satisfied
687	6926 4	GH6	69	26	usual resident	1380	women_GDHS_14.dta	ashanti urban	69	1644492		20-24	female		exposed	ashanti	urban	other	christianity	secondary/higher	12	richest	198290		no		yes	no	no	no	yes	no		yes, paid by a relative / friend	yes, valid		yes	private	outpatient	combination of any of the above	yes	yes	yes	yes	good	very easy	very satisfied	very satisfied	very satisfied
688	6931 2	GH6	69	31	usual resident	1380	women_GDHS_14.dta	ashanti urban	69	1644492		over44	female		exposed	ashanti	urban	akan	christianity	secondary/higher	9	richest	132477		yes		yes	no	no	no	yes	no		yes, paid myself	yes, valid		yes	private	outpatient	combination of any of the above	yes	no	yes	yes	good	easy	fairly satisfied	fairly satisfied	fairly satisfied
689	70 3 2	GH6	70	3	usual resident	1378	women_GDHS_14.dta	northern rural	70	761264		30-34	female		unexposed	northern	rural	other	christianity	secondary/higher	9	poorer	-70952		no		yes	no	no	no	yes	no		yes, paid myself	yes, valid		yes	public/gov't	outpatient	national health insurance	no	yes	yes	yes	very good	very easy	very satisfied	very satisfied	very satisfied
690	7018 2	GH6	70	18	usual resident	1378	women_GDHS_14.dta	northern rural	70	761264		15-19	female		unexposed	northern	rural	other	christianity	secondary/higher	9	poorer	-68658		no		yes	no	no	no	yes	no		yes, paid myself	yes, valid		yes	public/gov't	outpatient	national health insurance	no	no	no	yes	good	fairly easy	not satisfied	not satisfied	not satisfied
691	7032 2	GH6	70	32	usual resident	1378	women_GDHS_14.dta	northern rural	70	761264		20-24	female		unexposed	northern	rural	other	christianity	secondary/higher	6	poorer	-52704		no		yes	no	no	no	yes	no		yes, paid by a relative / friend	yes, valid		yes	public/gov't	outpatient	national health insurance	no	yes	yes	no	good	fairly easy	not satisfied	very satisfied	not satisfied
692	72 4 2	GH6	72	4	usual resident	1380	women_GDHS_14.dta	western rural	72	1675452		30-34	female		unexposed	western	rural	akan	christianity	none	0	middle	-20427		no		yes	no	no	no	yes	no		yes, paid by a relative / friend	yes, valid		yes	public/gov't	outpatient	national health insurance	no	yes	yes	yes	very good	easy	satisfied	satisfied	satisfied
693	72 6 2	GH6	72	6	usual resident	1380	women_GDHS_14.dta	western rural	72	1675452		over44	female		unexposed	western	rural	akan	christianity	secondary/higher	10	middle	-4894		yes		yes	no	no	no	yes	no		yes, paid myself	yes, valid		yes	public/gov't	outpatient	national health insurance	no	yes	yes	yes	very good	very easy	very satisfied	satisfied	very satisfied
694	7228 2	GH6	72	28	usual resident	1380	women_GDHS_14.dta	western rural	72	1675452		15-19	female		unexposed	western	rural	akan	christianity	secondary/higher	9	middle	4783		no		yes	no	no	no	yes	no		yes, paid by a relative / friend	yes, valid		yes	public/gov't	outpatient	national health insurance	no	yes	yes	yes	good	easy	satisfied	satisfied	satisfied
695	7230 2	GH6	72	30	usual resident	1380	women_GDHS_14.dta	western rural	72	1675452		15-19	female		unexposed	western	rural	akan	christianity	secondary/higher	9	poorest	-76766		no		yes	no	no	no	yes	no		yes, paid by a relative / friend	yes, valid		yes	public/gov't	outpatient	national health insurance	no	yes	yes	yes	good	easy	satisfied	satisfied	satisfied
696	73 2 2	GH6	73	2	usual resident	1378	women_GDHS_14.dta	upper west rural	73	236740		40-44	female		unexposed	upper west	rural	mole_dagbani	christianity	none	0	poorest	-84090		no		yes	no	no	no	yes	no		yes, paid by a relative / friend	yes, valid		yes	public/gov't	outpatient	national health insurance	no	yes	yes	yes	good	easy	fairly satisfied	satisfied	fairly satisfied
697	73 3 2	GH6	73	3	usual resident	1378	women_GDHS_14.dta	upper west rural	73	236740		30-34	female		unexposed	upper west	rural	mole_dagbani	christianity	secondary/higher	14	middle	1804		no		yes	no	no	no	yes	no		yes, paid by employer/ssnit	yes, valid		yes	public/gov't	outpatient	national health insurance	no	yes	yes	yes	very good	very easy	very satisfied	very satisfied	very satisfied
698	73 8 3	GH6	73	8	usual resident	1378	women_GDHS_14.dta	upper west rural	73	236740		15-19	female		unexposed	upper west	rural	mole_dagbani	christianity	secondary/higher	8	poorest	-134127		no		yes	no	no	no	yes	no		yes, paid by a relative / friend	yes, valid		yes	public/gov't	outpatient	national health insurance	no	yes	yes	yes	fair	easy	satisfied	satisfied	satisfied
699	7319 3	GH6	73	19	visitor	1378	women_GDHS_14.dta	upper west rural	73	236740		30-34	female		unexposed	upper west	rural	mole_dagbani	christianity	secondary/higher	6	poorest	-135849		no		yes	no	no	no	yes	no		yes, paid by a relative / friend	yes, valid		yes	public/gov't	outpatient	national health insurance	no	yes	yes	yes	good	fairly easy	not satisfied	satisfied	very satisfied
700	7322 2	GH6	73	22	usual resident	1378	women_GDHS_14.dta	upper west rural	73	236740		40-44	female		unexposed	upper west	rural	mole_dagbani	christianity	none	0	poorest	-191999		no		yes	no	no	no	yes	no		yes, paid by a relative / friend	yes, valid		yes	public/gov't	outpatient	national health insurance	no	yes	yes	yes	good	easy	not satisfied	fairly satisfied	fairly satisfied
701	7331 2	GH6	73	31	usual resident	1378	women_GDHS_14.dta	upper west rural	73	236740		25-29	female		unexposed	upper west	rural	mole_dagbani	christianity	none	0	poorest	-106948		no		yes	no	no	no	yes	no		no, other	yes, valid		yes	public/gov't	outpatient	national health insurance	no	yes	yes	no	very good	easy	satisfied	satisfied
702	74 2 2	GH6	74	2	usual resident	1377	women_GDHS_14.dta	upper west urban	74	391164		25-29	female		unexposed	upper west	urban	mole_dagbani	islam	secondary/higher	16	richest	128420		no		yes	no	no	no	yes	no		yes, paid myself	yes, valid		yes	private	outpatient	cash	yes	yes	no	yes	good	easy	satisfied	satisfied	fairly satisfied
703	74 2 7	GH6	74	2	visitor	1377	women_GDHS_14.dta	upper west urban	74	391164		35-39	female		unexposed	upper west	urban	mole_dagbani	islam	none	0	richest	128420		no		yes	no	no	no	yes	no		yes, paid myself	yes, valid		yes	public/gov't	outpatient	national health insurance	no	yes	yes	yes	good	easy	not satisfied	fairly satisfied	satisfied
704	74 6 2	GH6	74	6	usual resident	1377	women_GDHS_14.dta	upper west urban	74	391164		20-24	female		unexposed	upper west	urban	mole_dagbani	islam	primary education	3	richest	151070		no		yes	no	no	no	yes	no		yes, paid by a relative / friend	yes, valid		yes	private	outpatient	national health insurance	no	yes	yes	yes	good	easy	not satisfied	satisfied	fairly satisfied
705	7410 2	GH6	74	10	usual resident	1377	women_GDHS_14.dta	upper west urban	74	391164		35-39	female		unexposed	upper west	urban	mole_dagbani	islam	none	0	middle	18442		no		yes	no	no	no	yes	no		no, other	yes, valid		yes	public/gov't	outpatient	national health insurance	no	yes	yes	yes	good	easy	satisfied	satisfied	fairly satisfied
706	7420 2	GH6	74	20	usual resident	1377	women_GDHS_14.dta	upper west urban	74	391164		20-24	female		unexposed	upper west	urban	mole_dagbani	islam	primary education	3	middle	-10585		no		yes	no	no	no	yes	no		yes, paid by a relative / friend	yes, valid		yes	public/gov't	outpatient	national health insurance	no	yes	yes	yes	good	easy	not satisfied	satisfied	fairly satisfied
707	7424 2	GH6	74	24	usual resident	1377	women_GDHS_14.dta	upper west urban	74	391164		35-39	female		unexposed	upper west	urban	mole_dagbani	islam	none	0	richest	115355		yes		yes	no	no	no	yes	no		yes, paid by a relative / friend	yes, valid		yes	public/gov't	outpatient	national health insurance	no	yes	yes	yes	good	easy	not satisfied	satisfied	fairly satisfied
708	7429 1	GH6	74	29	usual resident	1377	women_GDHS_14.dta	upper west urban	74	391164		30-34	female		unexposed	upper west	urban	mole_dagbani	islam	primary education	6	middle	23051		no		yes	no	no	no	yes	no		yes, paid myself	yes, valid		yes	private	outpatient	cash	yes	yes	yes	yes	good	easy	satisfied	satisfied	fairly satisfied
709	7432 2	GH6	74	32	usual resident	1377	women_GDHS_14.dta	upper west urban	74	391164		30-34	female		unexposed	upper west	urban	mole_dagbani	islam	primary education	2	richer	34746		no		yes	no	no	no	yes	no		yes, paid by a relative / friend	yes, valid		yes	public/gov't	outpatient	national health insurance	no	yes	yes	yes	fair	fairly easy	not satisfied	satisfied	fairly satisfied
710	75 1 2	GH6	75	1	usual resident	1378	women_GDHS_14.dta	upper east rural	75	455938		20-24	female		unexposed	upper east	rural	mole_dagbani	christianity	none	0	poorer	-56594		no		yes	no	no	no	yes	no		yes, paid myself	yes, valid		yes	public/gov't	outpatient	national health insurance	no	yes	yes	yes	good	easy	fairly satisfied	fairly satisfied	satisfied
711	75 2 4	GH6	75	2	usual resident	1378	women_GDHS_14.dta	upper east rural	75	455938		30-34	female		unexposed	upper east	rural	mole_dagbani	christianity	none	0	poorest	-218531		no		yes	no	no	no	yes	no		yes, paid by a relative / friend	yes, valid		yes	public/gov't	outpatient	national health insurance	no	yes	yes	yes	good	easy	fairly satisfied	fairly satisfied	satisfied
712	75 3 2	GH6	75	3	usual resident	1378	women_GDHS_14.dta	upper east rural	75	455938		25-29	female		unexposed	upper east	rural	mole_dagbani	christianity	primary education	4	poorer	-62902		yes		yes	no	no	no	yes	no		yes, paid myself	yes, valid		yes	public/gov't	outpatient	national health insurance	no	yes	yes	yes	good	very easy	satisfied	fairly satisfied	satisfied
713	7512 2	GH6	75	12	usual resident	1378	women_GDHS_14.dta	upper east rural	75	455938		35-39	female		unexposed	upper east	rural	other	christianity	none	0	poorest	-168603		no		yes	no	no	no	yes	no		8	yes, valid		yes	public/gov't	outpatient	national health insurance	no	yes	yes	yes	good	very easy	very satisfied	satisfied
714	7520 2	GH6	75	20	usual resident	1378	women_GDHS_14.dta	upper east rural	75	455938		20-24	female		unexposed	upper east	rural	mole_dagbani	christianity	secondary/higher	8	poorest	-227540		no		yes	no	no	no	yes	no		yes, paid by a relative / friend	yes, valid		yes	public/gov't	outpatient	national health insurance	no	yes	yes	yes	good	fairly easy	satisfied	fairly satisfied	satisfied
715	7533 2	GH6	75	33	usual resident	1378	women_GDHS_14.dta	upper east rural	75	455938		30-34	female		unexposed	upper east	rural	other	christianity	none	0	poorest	-131470		no		yes	no	no	no	yes	no		yes, paid by a relative / friend	yes, valid		yes	public/gov't	outpatient	national health insurance	no	yes	no	yes	very good	easy	satisfied	satisfied	very satisfied
716	76 6 3	GH6	76	6	usual resident	1378	women_GDHS_14.dta	northern rural	76	800736		15-19	female		unexposed	northern	rural	other	other	secondary/higher	7	poorest	-106905		no		yes	no	no	no	yes	no		yes, paid by a relative / friend	yes, valid		yes	public/gov't	outpatient	national health insurance	no	yes	yes	yes	very good	very easy	satisfied	satisfied	satisfied
717	7618 9	GH6	76	18	usual resident	1378	women_GDHS_14.dta	northern rural	76	800736		35-39	female		unexposed	northern	rural	other	other	none	0	poorest	-82701		no		yes	no	no	no	yes	no		yes, paid myself	yes, valid		yes	public/gov't	outpatient	national health insurance	no	yes	yes	yes	good	easy	not satisfied	very satisfied	very satisfied
718	7622 2	GH6	76	22	usual resident	1378	women_GDHS_14.dta	northern rural	76	800736		30-34	female		unexposed	northern	rural	other	christianity	secondary/higher	9	poorest	-109661		no		yes	no	no	no	yes	no		yes, paid myself	yes, valid		yes	public/gov't	outpatient	national health insurance	no	yes	yes	yes	good	very easy	not satisfied	not satisfied	not satisfied
719	7632 10	GH6	76	32	usual resident	1378	women_GDHS_14.dta	northern rural	76	800736		20-24	female		unexposed	northern	rural	other	christianity	primary education	6	poorest	-117343		no		yes	no	no	no	yes	no		yes, paid myself	yes, valid		yes	public/gov't	outpatient	national health insurance	no	yes	yes	yes	good	very easy	satisfied	satisfied
720	7716 1	GH6	77	16	usual resident	1378	women_GDHS_14.dta	northern urban	77	223231		40-44	female		unexposed	northern	urban	other	islam	none	0	middle	18516		no		yes	no	no	no	yes	no		yes, paid myself	yes, valid		yes	public/gov't	outpatient	national health insurance	no	yes	yes	yes	good	very easy	satisfied	satisfied	satisfied
721	7832 2	GH6	78	32	usual resident	1377	women_GDHS_14.dta	northern urban	78	404062		30-34	female		unexposed	northern	urban	mole_dagbani	islam	secondary/higher	14	poorer	-54480		yes		yes	no	no	no	yes	no		yes, paid by a relative / friend	yes, valid		yes	private	outpatient	cash	yes	yes	yes	yes	very good	very easy	very satisfied	very satisfied	very satisfied
722	79 5 2	GH6	79	5	usual resident	1379	women_GDHS_14.dta	eastern urban	79	944604		25-29	female		unexposed	eastern	urban	ewe	christianity	none	0	middle	17271		no		yes	no	no	no	yes	no		yes, paid myself	yes, valid		yes	public/gov't	outpatient	combination of any of the above	yes	yes	yes	yes	good	very easy	fairly satisfied	fairly satisfied	not satisfied
723	80 5 1	GH6	80	5	usual resident	1378	women_GDHS_14.dta	brong ahafo urban	80	1521245		over44	female		unexposed	brong ahafo	urban	akan	christianity	primary education	6	richer	36151		yes		yes	no	no	no	yes	no		yes, paid by a relative / friend	yes, valid		yes	public/gov't	outpatient	national health insurance	no	yes	yes	yes	good	very easy	very satisfied	very satisfied	not satisfied
724	80 5 2	GH6	80	5	usual resident	1378	women_GDHS_14.dta	brong ahafo urban	80	1521245		25-29	female		unexposed	brong ahafo	urban	akan	christianity	secondary/higher	9	richer	36151		no		yes	no	no	no	yes	no		yes, paid by a relative / friend	yes, valid		yes	public/gov't	outpatient	national health insurance	no	yes	yes	yes	good	easy	satisfied	fairly satisfied	fairly satisfied
725	80 7 1	GH6	80	7	usual resident	1378	women_GDHS_14.dta	brong ahafo urban	80	1521245		30-34	female		unexposed	brong ahafo	urban	akan	christianity	secondary/higher	9	middle	27154		no		yes	no	no	no	yes	no		yes, paid by a relative / friend	yes, valid		yes	public/gov't	outpatient	national health insurance	no	yes	yes	no	fair	fairly easy	very dissatisfied	very dissatisfied	fairly satisfied
726	8019 3	GH6	80	19	usual resident	1378	women_GDHS_14.dta	brong ahafo urban	80	1521245		20-24	female		unexposed	brong ahafo	urban	other	christianity	secondary/higher	9	middle	18846		no		yes	no	no	no	yes	no		yes, paid by a relative / friend	yes, valid		yes	public/gov't	outpatient	national health insurance	no	yes	yes	yes	fair	easy	very dissatisfied	very dissatisfied
727	8030 2	GH6	80	30	usual resident	1378	women_GDHS_14.dta	brong ahafo urban	80	1521245		over44	female		unexposed	brong ahafo	urban	akan	christianity	secondary/higher	15	richer	40701		no		yes	no	no	no	yes	no		yes, paid by employer/ssnit	yes, valid		yes	public/gov't	outpatient	national health insurance	no	yes	yes	yes	very good	fairly easy	satisfied	satisfied	fairly satisfied
728	8030 3	GH6	80	30	usual resident	1378	women_GDHS_14.dta	brong ahafo urban	80	1521245		20-24	female		unexposed	brong ahafo	urban	akan	christianity	secondary/higher	12	richer	40701		no		yes	no	no	no	yes	no		yes, paid by a relative / friend	yes, valid		yes	public/gov't	outpatient	national health insurance	no	no	yes	yes	very good	easy	very dissatisfied	satisfied	very dissatisfied
729	8119 3	GH6	81	19	usual resident	1380	women_GDHS_14.dta	western urban	81	821697		25-29	female		unexposed	western	urban	akan	christianity	secondary/higher	16	richest	153847		no		yes	no	no	no	yes	no		yes, paid myself	yes, valid		yes	public/gov't	outpatient	cash	yes	no	yes	no	very good	very easy	satisfied	not satisfied	very satisfied
730	8124 1	GH6	81	24	usual resident	1380	women_GDHS_14.dta	western urban	81	821697		20-24	female		unexposed	western	urban	akan	christianity	secondary/higher	15	richest	147844		no		yes	no	no	no	yes	no		yes, paid by a relative / friend	yes, valid		yes	public/gov't	outpatient	national health insurance	no	yes	yes	yes	very good	very easy	very satisfied	very satisfied	very satisfied
731	8127 2	GH6	81	27	usual resident	1380	women_GDHS_14.dta	western urban	81	821697		25-29	female		unexposed	western	urban	akan	christianity	secondary/higher	12	richer	59186		no		yes	no	no	no	yes	no		yes, paid myself	yes, valid		yes	public/gov't	outpatient	national health insurance	no	yes	yes	yes	very good	very easy	not satisfied	very satisfied	very satisfied
732	8128 1	GH6	81	28	usual resident	1380	women_GDHS_14.dta	western urban	81	821697		20-24	female		unexposed	western	urban	akan	christianity	secondary/higher	13	richest	133743		no		yes	no	no	no	yes	no		yes, paid myself	yes, valid		yes	public/gov't	outpatient	national health insurance	no	yes	yes	no	very good	very easy	fairly satisfied	satisfied	very dissatisfied
733	8132 1	GH6	81	32	usual resident	1380	women_GDHS_14.dta	western urban	81	821697		over44	female		unexposed	western	urban	akan	christianity	secondary/higher	10	richest	107315		no		yes	no	no	no	yes	no		yes, paid myself	yes, valid		yes	public/gov't	outpatient	national health insurance	no	yes	yes	yes	very good	very easy	very satisfied	very satisfied	very satisfied
734	82 7 6	GH6	82	7	visitor	1377	women_GDHS_14.dta	western urban	82	552385		15-19	female		unexposed	western	urban	akan	christianity	secondary/higher	12	richest	164418		no		yes	no	no	no	yes	no		yes, paid by a relative / friend	yes, valid		yes	public/gov't	outpatient	national health insurance	no	yes	yes	yes	very good	very easy	very satisfied	not satisfied	fairly satisfied
735	8216 2	GH6	82	16	usual resident	1377	women_GDHS_14.dta	western urban	82	552385		35-39	female		unexposed	western	urban	akan	christianity	secondary/higher	12	richest	193376		yes		yes	no	no	no	yes	no		yes, paid myself	yes, valid		yes	public/gov't	outpatient	national health insurance	no	yes	yes	yes	very good	very easy	not satisfied	satisfied	very satisfied
736	8219 4	GH6	82	19	usual resident	1377	women_GDHS_14.dta	western urban	82	552385		15-19	female		unexposed	western	urban	akan	christianity	secondary/higher	10	middle	26421		no		yes	no	no	no	yes	no		yes, paid by a relative / friend	yes, valid		yes	public/gov't	outpatient	national health insurance	no	yes	yes	yes	good	easy	fairly satisfied	satisfied	satisfied
737	8221 4	GH6	82	21	usual resident	1377	women_GDHS_14.dta	western urban	82	552385		15-19	female		unexposed	western	urban	akan	christianity	secondary/higher	10	richest	196603		no		yes	no	no	no	yes	no		yes, paid by a relative / friend	yes, valid		yes	public/gov't	outpatient	national health insurance	no	yes	yes	no	very good	very easy	not satisfied	fairly satisfied	not satisfied
738	8228 2	GH6	82	28	usual resident	1377	women_GDHS_14.dta	western urban	82	552385		35-39	female		unexposed	western	urban	akan	christianity	secondary/higher	16	richest	228337		no		yes	no	no	no	yes	no		yes, paid myself	yes, valid		yes	public/gov't	outpatient	cash	yes	no	yes	yes	fair	difficult	satisfied	satisfied	satisfied
739	8324 1	GH6	83	24	usual resident	1377	women_GDHS_14.dta	greater accra urban	83	1315170		35-39	female		unexposed	greater accra	urban	ewe	christianity	secondary/higher	7	richest	145061		no		yes	no	no	no	yes	no		yes, paid myself	yes, valid		yes	private	outpatient	cash	yes	yes	yes	yes	very good	very easy	very satisfied	very satisfied	satisfied
740	8328 2	GH6	83	28	usual resident	1377	women_GDHS_14.dta	greater accra urban	83	1315170		35-39	female		unexposed	greater accra	urban	akan	christianity	none	0	richest	112097		no		yes	no	no	no	yes	no		8	yes, valid		yes	public/gov't	outpatient	national health insurance	no	yes	yes	yes	good	fairly easy	satisfied	satisfied	satisfied
741	8418 2	GH6	84	18	usual resident	1379	women_GDHS_14.dta	brong ahafo rural	84	675869		25-29	female		unexposed	brong ahafo	rural	akan	christianity	primary education	3	poorer	-68589		no		yes	no	no	no	yes	no		8	yes, valid		yes	public/gov't	outpatient	national health insurance	no	yes	yes	yes	very good	very easy	fairly satisfied	fairly satisfied	not satisfied
742	85 4 2	GH6	85	4	usual resident	1380	women_GDHS_14.dta	upper east rural	85	337813		30-34	female		unexposed	upper east	rural	mole_dagbani	other	primary education	3	poorest	-128889		no		yes	no	no	no	yes	no		yes, paid myself	yes, valid		yes	public/gov't	outpatient	national health insurance	no	yes	yes	yes	good	easy	fairly satisfied	fairly satisfied	satisfied
743	85 8 2	GH6	85	8	usual resident	1380	women_GDHS_14.dta	upper east rural	85	337813		20-24	female		unexposed	upper east	rural	mole_dagbani	christianity	secondary/higher	9	middle	24393		no		yes	no	no	no	yes	no		yes, paid by a relative / friend	yes, valid		yes	public/gov't	outpatient	national health insurance	no	yes	yes	yes	good	easy	satisfied	satisfied	satisfied
744	8515 2	GH6	85	15	usual resident	1380	women_GDHS_14.dta	upper east rural	85	337813		30-34	female		unexposed	upper east	rural	mole_dagbani	christianity	none	0	poorest	-143682		no		yes	no	no	no	yes	no		yes, paid myself	yes, valid		yes	public/gov't	outpatient	national health insurance	no	yes	yes	yes	good	easy	satisfied	satisfied	satisfied
745	8516 1	GH6	85	16	usual resident	1380	women_GDHS_14.dta	upper east rural	85	337813		over44	female		unexposed	upper east	rural	mole_dagbani	christianity	none	0	poorest	-120846		yes		yes	no	no	no	yes	no		yes, paid myself	yes, valid		yes	public/gov't	outpatient	national health insurance	no	yes	yes	yes	good	easy	satisfied	satisfied
746	8524 3	GH6	85	24	usual resident	1380	women_GDHS_14.dta	upper east rural	85	337813		15-19	female		unexposed	upper east	rural	mole_dagbani	christianity	secondary/higher	9	poorest	-142904		no		yes	no	no	no	yes	no		yes, paid by a relative / friend	yes, valid		yes	public/gov't	outpatient	national health insurance	no	yes	yes	yes	good	easy	satisfied	satisfied	satisfied
747	8529 2	GH6	85	29	usual resident	1380	women_GDHS_14.dta	upper east rural	85	337813		20-24	female		unexposed	upper east	rural	mole_dagbani	christianity	secondary/higher	7	poorest	-155705		no		yes	no	no	no	yes	no		yes, paid by a relative / friend	yes, valid		yes	public/gov't	outpatient	national health insurance	no	yes	yes	yes	good	easy	satisfied	satisfied	satisfied
748	8533 4	GH6	85	33	usual resident	1380	women_GDHS_14.dta	upper east rural	85	337813		20-24	female		unexposed	upper east	rural	mole_dagbani	christianity	none	0	poorest	-144497		no		yes	no	no	no	yes	no		yes, paid myself	yes, valid		yes	public/gov't	outpatient	national health insurance	no	yes	yes	yes	good	easy	satisfied	satisfied	satisfied
749	8624 2	GH6	86	24	usual resident	1377	women_GDHS_14.dta	brong ahafo rural	86	569953		25-29	female		unexposed	brong ahafo	rural	other	christianity	none	0	poorer	-72955		no		yes	no	no	no	yes	no		yes, paid by a relative / friend	yes, valid		yes	public/gov't	outpatient	national health insurance	no	yes	yes	yes	good	fairly easy	very satisfied	very satisfied	very satisfied
750	8630 2	GH6	86	30	usual resident	1377	women_GDHS_14.dta	brong ahafo rural	86	569953		20-24	female		unexposed	brong ahafo	rural	mole_dagbani	christianity	none	0	poorer	-45159		no		yes	no	no	no	yes	no		yes, paid by a relative / friend	yes, valid		yes	public/gov't	outpatient	national health insurance	no	yes	yes	yes	good	very easy	satisfied	satisfied	fairly satisfied
751	87 1 2	GH6	87	1	usual resident	1378	women_GDHS_14.dta	upper east rural	87	291271		20-24	female		unexposed	upper east	rural	mole_dagbani	christianity	primary education	1	poorest	-133945		no		yes	no	no	no	yes	no		yes, paid by a relative / friend	yes, valid		yes	public/gov't	outpatient	national health insurance	no	yes	yes	yes	very good	very easy	satisfied	satisfied	satisfied
752	87 2 2	GH6	87	2	usual resident	1378	women_GDHS_14.dta	upper east rural	87	291271		25-29	female		unexposed	upper east	rural	mole_dagbani	christianity	none	0	poorest	-143571		no		yes	no	no	no	yes	no		yes, paid by a relative / friend	yes, valid		yes	public/gov't	outpatient	national health insurance	no	yes	yes	yes	good	easy	fairly satisfied	very satisfied
753	87 9 2	GH6	87	9	usual resident	1378	women_GDHS_14.dta	upper east rural	87	291271		20-24	female		unexposed	upper east	rural	mole_dagbani	other	secondary/higher	7	poorest	-236727		no		yes	no	no	no	yes	no		yes, paid by a relative / friend	yes, valid		yes	public/gov't	outpatient	national health insurance	no	yes	yes	yes	very good	very easy	very satisfied	very satisfied	very satisfied
754	8710 2	GH6	87	10	usual resident	1378	women_GDHS_14.dta	upper east rural	87	291271		15-19	female		unexposed	upper east	rural	mole_dagbani	christianity	primary education	5	poorest	-152470		no		yes	no	no	no	yes	no		yes, paid by a relative / friend	yes, valid		yes	public/gov't	outpatient	national health insurance	no	yes	yes	yes	very good	easy	very satisfied	very satisfied
755	8722 2	GH6	87	22	usual resident	1378	women_GDHS_14.dta	upper east rural	87	291271		over44	female		unexposed	upper east	rural	mole_dagbani	christianity	none	0	poorest	-204967		no		yes	no	no	no	yes	no		yes, paid by a relative / friend	yes, valid		yes	public/gov't	outpatient	national health insurance	no	yes	yes	yes	good	very easy	satisfied	satisfied	satisfied
756	8723 1	GH6	87	23	usual resident	1378	women_GDHS_14.dta	upper east rural	87	291271		over44	female		unexposed	upper east	rural	mole_dagbani	christianity	none	0	poorest	-158250		no		yes	no	no	no	yes	no		yes, paid myself	yes, valid		yes	public/gov't	outpatient	national health insurance	no	yes	yes	yes	very good	very easy	satisfied	satisfied	satisfied
757	8725 2	GH6	87	25	usual resident	1378	women_GDHS_14.dta	upper east rural	87	291271		25-29	female		unexposed	upper east	rural	mole_dagbani	christianity	primary education	4	poorest	-182548		no		yes	no	no	no	yes	no		yes, paid by a relative / friend	yes, valid		yes	public/gov't	outpatient	national health insurance	no	yes	yes	yes	good	very easy	satisfied	satisfied	satisfied
758	8727 2	GH6	87	27	usual resident	1378	women_GDHS_14.dta	upper east rural	87	291271		15-19	female		unexposed	upper east	rural	mole_dagbani	christianity	secondary/higher	9	poorest	-161752		no		yes	no	no	no	yes	no		yes, paid by a relative / friend	yes, valid		yes	public/gov't	outpatient	national health insurance	no	yes	yes	yes	very good	very easy	satisfied	fairly satisfied	fairly satisfied
759	8729 7	GH6	87	29	usual resident	1378	women_GDHS_14.dta	upper east rural	87	291271		15-19	female		unexposed	upper east	rural	mole_dagbani	other	primary education	3	poorest	-164329		no		yes	no	no	no	yes	no		yes, paid by a relative / friend	yes, valid		yes	public/gov't	outpatient	national health insurance	no	yes	yes	yes	good	easy	satisfied	very satisfied
760	8730 2	GH6	87	30	usual resident	1378	women_GDHS_14.dta	upper east rural	87	291271		20-24	female		unexposed	upper east	rural	mole_dagbani	christianity	secondary/higher	7	poorest	-155920		no		yes	no	no	no	yes	no		yes, paid myself	yes, valid		yes	public/gov't	outpatient	national health insurance	no	yes	yes	yes	good	very easy	satisfied	satisfied	satisfied
761	8732 1	GH6	87	32	usual resident	1378	women_GDHS_14.dta	upper east rural	87	291271		40-44	female		unexposed	upper east	rural	mole_dagbani	christianity	none	0	poorest	-169325		no		yes	no	no	no	yes	no		yes, paid myself	yes, valid		yes	private	outpatient	national health insurance	no	yes	yes	yes	good	easy	satisfied	very satisfied	satisfied
762	8733 1	GH6	87	33	usual resident	1378	women_GDHS_14.dta	upper east rural	87	291271		40-44	female		unexposed	upper east	rural	mole_dagbani	christianity	none	0	poorest	-123211		yes		yes	no	no	no	yes	no		yes, paid myself	yes, valid		yes	public/gov't	outpatient	national health insurance	no	yes	yes	yes	good	fairly easy	fairly satisfied	very satisfied	very dissatisfied
763	88 4 2	GH6	88	4	usual resident	1378	women_GDHS_14.dta	greater accra urban	88	1591542		25-29	female		unexposed	greater accra	urban	ewe	christianity	secondary/higher	12	richest	189495		yes		yes	no	no	no	yes	no		yes, paid myself	yes, valid		yes	private	outpatient	cash	yes	yes	yes	yes	very good	very easy	very satisfied	very satisfied	very satisfied
764	8813 2	GH6	88	13	usual resident	1378	women_GDHS_14.dta	greater accra urban	88	1591542		40-44	female		unexposed	greater accra	urban	mole_dagbani	islam	primary education	5	richest	178792		yes		yes	no	no	no	yes	no		yes, paid myself	yes, valid		yes	public/gov't	outpatient	national health insurance	no	yes	no	yes	very good	very easy	very satisfied	very satisfied	very satisfied
765	8824 2	GH6	88	24	usual resident	1378	women_GDHS_14.dta	greater accra urban	88	1591542		30-34	female		unexposed	greater accra	urban	akan	christianity	secondary/higher	12	richest	133124		no		yes	no	no	no	yes	no		yes, paid by a relative / friend	yes, valid		yes	public/gov't	outpatient	national health insurance	no	yes	no	no	poor	difficult	very dissatisfied	fairly satisfied	not satisfied
766	8825 2	GH6	88	25	usual resident	1378	women_GDHS_14.dta	greater accra urban	88	1591542		25-29	female		unexposed	greater accra	urban	akan	christianity	secondary/higher	12	richest	179687		no		yes	no	no	no	yes	no		yes, paid myself	yes, valid		yes	public/gov't	outpatient	combination of any of the above	yes	yes	no	yes	very good	very easy	satisfied	very satisfied	satisfied
767	8829 1	GH6	88	29	usual resident	1378	women_GDHS_14.dta	greater accra urban	88	1591542		40-44	female		unexposed	greater accra	urban	other	christianity	secondary/higher	10	richest	177172		yes		yes	no	no	no	yes	no		yes, paid myself	yes, valid		yes	private	outpatient	national health insurance	no	yes	no	yes	very good	very easy	satisfied	satisfied	satisfied
768	8833 2	GH6	88	33	usual resident	1378	women_GDHS_14.dta	greater accra urban	88	1591542		30-34	female		unexposed	greater accra	urban	akan	christianity	secondary/higher	9	richest	178212		no		yes	no	no	no	yes	no		yes, paid by a relative / friend	yes, valid		yes	private	outpatient	combination of any of the above	yes	yes	no	yes	good	fairly easy	not satisfied	satisfied	satisfied
769	9020 3	GH6	90	20	usual resident	1377	women_GDHS_14.dta	ashanti rural	90	1895309		20-24	female		exposed	ashanti	rural	akan	christianity	secondary/higher	9	poorest	-92207		no		yes	no	no	no	yes	no		yes, paid by a relative / friend	yes, valid		yes	public/gov't	outpatient	cash	yes	yes	yes	yes	good	fairly easy	satisfied	satisfied	satisfied
770	9028 2	GH6	90	28	usual resident	1377	women_GDHS_14.dta	ashanti rural	90	1895309		25-29	female		exposed	ashanti	rural	akan	christianity	secondary/higher	9	poorest	-114223		no		yes	no	no	no	yes	no		yes, paid by a relative / friend	yes, valid		yes	public/gov't	outpatient	national health insurance	no	yes	yes	yes	good	easy	satisfied	satisfied	satisfied
771	9115 2	GH6	91	15	usual resident	1377	women_GDHS_14.dta	central rural	91	683000		20-24	female		unexposed	central	rural	akan	christianity	secondary/higher	9	poorer	-59849		no		yes	no	no	no	yes	no		yes, paid myself	yes, valid		yes	public/gov't	outpatient	national health insurance	no	no	yes	yes	fair	fairly easy	very satisfied	fairly satisfied	fairly satisfied
772	9115 3	GH6	91	15	usual resident	1377	women_GDHS_14.dta	central rural	91	683000		15-19	female		unexposed	central	rural	akan	christianity	secondary/higher	11	poorer	-59849		no		yes	no	no	no	yes	no		yes, paid by a relative / friend	yes, valid		yes	public/gov't	outpatient	national health insurance	no	yes	no	yes	very good	very easy	very satisfied	satisfied	satisfied
773	9125 3	GH6	91	25	usual resident	1377	women_GDHS_14.dta	central rural	91	683000		20-24	female		unexposed	central	rural	akan	christianity	secondary/higher	7	poorer	-58666		no		yes	no	no	no	yes	no		yes, paid myself	yes, valid		yes	public/gov't	outpatient	national health insurance	no	yes	no	yes	good	easy	fairly satisfied	fairly satisfied	satisfied
774	9126 3	GH6	91	26	usual resident	1377	women_GDHS_14.dta	central rural	91	683000		25-29	female		unexposed	central	rural	akan	christianity	secondary/higher	9	poorest	-77258		yes		yes	no	no	no	yes	no		yes, paid by a relative / friend	yes, valid		yes	public/gov't	outpatient	national health insurance	no	yes	no	yes	very good	fairly easy	fairly satisfied	satisfied	satisfied
775	9211 5	GH6	92	11	usual resident	1378	women_GDHS_14.dta	ashanti urban	92	1858439		15-19	female		exposed	ashanti	urban	akan	islam	secondary/higher	10	richer	42142		no		yes	no	no	no	yes	no		yes, paid by a relative / friend	yes, valid		yes	public/gov't	outpatient	combination of any of the above	yes	yes	yes	yes	very good	fairly easy	fairly satisfied	very satisfied	fairly satisfied
776	9217 2	GH6	92	17	usual resident	1378	women_GDHS_14.dta	ashanti urban	92	1858439		35-39	female		exposed	ashanti	urban	akan	christianity	secondary/higher	9	richer	82512		no		yes	no	no	no	yes	no		yes, paid by a relative / friend	yes, valid		yes	public/gov't	outpatient	combination of any of the above	yes	yes	yes	yes	fair	easy	not satisfied	satisfied	very dissatisfied
777	9230 2	GH6	92	30	usual resident	1378	women_GDHS_14.dta	ashanti urban	92	1858439		30-34	female		exposed	ashanti	urban	akan	christianity	secondary/higher	9	richest	104565		no		yes	no	no	no	yes	no		yes, paid by a relative / friend	yes, valid		yes	public/gov't	outpatient	combination of any of the above	yes	yes	yes	yes	very poor	easy	very dissatisfied	fairly satisfied	satisfied
778	93 3 2	GH6	93	3	usual resident	1377	women_GDHS_14.dta	central urban	93	858311		25-29	female		unexposed	central	urban	other	christianity	secondary/higher	15	richest	159597		no		yes	no	no	no	yes	no		no, exempt as indigent	yes, valid		yes	public/gov't	outpatient	national health insurance	no	yes	yes	yes	good	very easy	satisfied	satisfied	satisfied
779	9314 2	GH6	93	14	usual resident	1377	women_GDHS_14.dta	central urban	93	858311		30-34	female		unexposed	central	urban	other	islam	none	0	richer	82459		no		yes	no	no	no	yes	no		yes, paid by a relative / friend	yes, valid		yes	private	outpatient	national health insurance	no	yes	yes	yes	very good	very easy	very satisfied	very satisfied	very satisfied
780	9327 2	GH6	93	27	usual resident	1377	women_GDHS_14.dta	central urban	93	858311		25-29	female		unexposed	central	urban	akan	christianity	secondary/higher	15	richest	223837		no		yes	no	no	no	yes	no		no, exempt as indigent	yes, valid		yes	public/gov't	outpatient	national health insurance	no	yes	yes	yes	very good	very easy	not satisfied	very satisfied	not satisfied
781	9329 2	GH6	93	29	usual resident	1377	women_GDHS_14.dta	central urban	93	858311		35-39	female		unexposed	central	urban	akan	christianity	secondary/higher	9	richer	78323		no		yes	no	no	no	yes	no		yes, paid myself	yes, valid		yes	private	outpatient	cash	yes	yes	yes	yes	very good	very easy	satisfied	satisfied	satisfied
782	9330 2	GH6	93	30	usual resident	1377	women_GDHS_14.dta	central urban	93	858311		30-34	female		unexposed	central	urban	other	christianity	secondary/higher	10	middle	-1811		no		yes	no	no	no	yes	no		yes, paid by a relative / friend	yes, valid		yes	private	outpatient	national health insurance	no	yes	yes	yes	good	very easy	satisfied	satisfied	satisfied
783	9330 5	GH6	93	30	usual resident	1377	women_GDHS_14.dta	central urban	93	858311		25-29	female		unexposed	central	urban	ewe	christianity	secondary/higher	9	middle	-1811		no		yes	no	no	no	yes	no		yes, paid myself	yes, valid		yes	private	outpatient	national health insurance	no	yes	yes	yes	good	very easy	satisfied	satisfied	satisfied
784	9333 2	GH6	93	33	usual resident	1377	women_GDHS_14.dta	central urban	93	858311		30-34	female		unexposed	central	urban	other	islam	secondary/higher	7	middle	-3155		no		yes	no	no	no	yes	no		yes, paid by a relative / friend	yes, valid		yes	private	outpatient	national health insurance	no	yes	yes	yes	good	very easy	satisfied	satisfied	fairly satisfied
785	94 1 2	GH6	94	1	usual resident	1378	women_GDHS_14.dta	eastern urban	94	724589		30-34	female		unexposed	eastern	urban	akan	christianity	secondary/higher	10	richer	57700		no		yes	no	no	no	yes	no		yes, paid myself	yes, valid		yes	public/gov't	outpatient	national health insurance	no	yes	yes	yes	good	very easy	satisfied	satisfied	satisfied
786	94 4 2	GH6	94	4	usual resident	1378	women_GDHS_14.dta	eastern urban	94	724589		15-19	female		unexposed	eastern	urban	akan	christianity	secondary/higher	7	middle	16153		no		yes	no	no	no	yes	no		yes, paid by a relative / friend	yes, valid		yes	public/gov't	outpatient	national health insurance	no	yes	yes	yes	very good	very easy	satisfied	satisfied
787	9421 1	GH6	94	21	usual resident	1378	women_GDHS_14.dta	eastern urban	94	724589		40-44	female		unexposed	eastern	urban	akan	christianity	secondary/higher	10	middle	30062		no		yes	no	no	no	yes	no		yes, paid myself	yes, valid		yes	public/gov't	outpatient	national health insurance	no	yes	yes	yes	good	easy	not satisfied	fairly satisfied	not satisfied
788	9425 2	GH6	94	25	usual resident	1377	women_GDHS_14.dta	eastern urban	94	724589		25-29	female		unexposed	eastern	urban	akan	christianity	secondary/higher	12	middle	11895		no		yes	no	no	no	yes	no		yes, paid myself	yes, valid		yes	public/gov't	outpatient	national health insurance	no	yes	yes	yes	very good	easy	very satisfied	very satisfied
789	95 8 2	GH6	95	8	usual resident	1378	women_GDHS_14.dta	upper west rural	95	351079		20-24	female		unexposed	upper west	rural	other	islam	none	0	poorer	-62050		no		yes	no	no	no	yes	no		no, other	yes, valid		yes	public/gov't	outpatient	national health insurance	no	yes	yes	yes	good	fairly easy	fairly satisfied	very satisfied	fairly satisfied
790	9514 2	GH6	95	14	usual resident	1378	women_GDHS_14.dta	upper west rural	95	351079		35-39	female		unexposed	upper west	rural	other	islam	none	0	poorest	-94425		no		yes	no	no	no	yes	no		yes, paid myself	yes, valid		yes	public/gov't	outpatient	national health insurance	no	yes	yes	yes	good	fairly easy	fairly satisfied	very satisfied	very satisfied
791	9516 2	GH6	95	16	usual resident	1378	women_GDHS_14.dta	upper west rural	95	351079		30-34	female		unexposed	upper west	rural	other	islam	secondary/higher	7	poorer	-53419		no		yes	no	no	no	yes	no		yes, paid by a relative / friend	yes, valid		yes	public/gov't	outpatient	national health insurance	no	yes	yes	yes	poor	easy	fairly satisfied	fairly satisfied	fairly satisfied
792	9517 2	GH6	95	17	usual resident	1378	women_GDHS_14.dta	upper west rural	95	351079		30-34	female		unexposed	upper west	rural	other	islam	none	0	poorest	-87572		no		yes	no	no	no	yes	no		yes, paid by a relative / friend	yes, valid		yes	public/gov't	outpatient	national health insurance	no	yes	yes	yes	good	easy	fairly satisfied	fairly satisfied	fairly satisfied
793	9520 2	GH6	95	20	usual resident	1378	women_GDHS_14.dta	upper west rural	95	351079		25-29	female		unexposed	upper west	rural	other	islam	secondary/higher	9	poorest	-98918		no		yes	no	no	no	yes	no		yes, paid by a relative / friend	yes, valid		yes	public/gov't	outpatient	national health insurance	no	yes	yes	yes	good	fairly easy	fairly satisfied	very satisfied
794	9528 2	GH6	95	28	usual resident	1378	women_GDHS_14.dta	upper west rural	95	351079		30-34	female		unexposed	upper west	rural	other	islam	none	0	poorer	-62648		no		yes	no	no	no	yes	no		yes, paid myself	yes, valid		yes	public/gov't	outpatient	national health insurance	no	yes	yes	no	good	fairly easy	fairly satisfied	very satisfied
795	9532 1	GH6	95	32	usual resident	1378	women_GDHS_14.dta	upper west rural	95	351079		40-44	female		unexposed	upper west	rural	other	islam	none	0	poorest	-102323		no		yes	no	no	no	yes	no		yes, paid myself	yes, valid		yes	public/gov't	outpatient	national health insurance	no	yes	yes	yes	good	fairly easy	not satisfied	satisfied
796	9611 2	GH6	96	11	usual resident	1378	women_GDHS_14.dta	northern rural	96	796031		25-29	female		unexposed	northern	rural	other	christianity	none	0	poorest	-113052		no		yes	no	no	no	yes	no		yes, paid myself	yes, valid		yes	public/gov't	outpatient	national health insurance	no	yes	yes	yes	very good	very easy	very satisfied	very satisfied	very satisfied
797	9615 2	GH6	96	15	usual resident	1378	women_GDHS_14.dta	northern rural	96	796031		30-34	female		unexposed	northern	rural	other	christianity	none	0	poorest	-107158		no		yes	no	no	no	yes	no		yes, paid by a relative / friend	yes, valid		yes	public/gov't	outpatient	national health insurance	no	yes	yes	yes	very good	very easy	very satisfied	very satisfied	very satisfied
798	9619 2	GH6	96	19	usual resident	1378	women_GDHS_14.dta	northern rural	96	796031		25-29	female		unexposed	northern	rural	other	christianity	primary education	2	poorest	-73707		no		yes	no	no	no	yes	no		yes, paid myself	yes, valid		yes	public/gov't	outpatient	national health insurance	no	yes	yes	yes	very good	very easy	very satisfied	very satisfied	very satisfied
799	9623 8	GH6	96	23	usual resident	1378	women_GDHS_14.dta	northern rural	96	796031		25-29	female		unexposed	northern	rural	other	christianity	none	0	poorest	-200008		no		yes	no	no	no	yes	no		yes, paid myself	yes, valid		yes	public/gov't	outpatient	national health insurance	no	yes	yes	yes	good	very easy	very satisfied	very satisfied	very satisfied
800	97 3 1	GH6	97	3	usual resident	1379	women_GDHS_14.dta	brong ahafo rural	97	506288		over44	female		unexposed	brong ahafo	rural	other	christianity	secondary/higher	10	middle	-17049		no		yes	no	no	no	yes	no		yes, paid myself	yes, valid		yes	public/gov't	outpatient	combination of any of the above	yes	yes	yes	yes	very good	very easy	very satisfied	very satisfied	very satisfied
801	9711 1	GH6	97	11	usual resident	1379	women_GDHS_14.dta	brong ahafo rural	97	506288		35-39	female		unexposed	brong ahafo	rural	other	christianity	primary education	3	middle	-2666		no		yes	no	no	no	yes	no		yes, paid myself	yes, valid		yes	public/gov't	outpatient	combination of any of the above	yes	yes	yes	yes	good	easy	satisfied	satisfied	satisfied
802	9723 1	GH6	97	23	usual resident	1379	women_GDHS_14.dta	brong ahafo rural	97	506288		40-44	female		unexposed	brong ahafo	rural	akan	christianity	secondary/higher	13	richer	73460		no		yes	no	no	no	yes	no		yes, paid myself	yes, valid		yes	public/gov't	outpatient	national health insurance	no	yes	yes	yes	very good	very easy	very satisfied	very satisfied	very satisfied
803	9727 1	GH6	97	27	usual resident	1379	women_GDHS_14.dta	brong ahafo rural	97	506288		35-39	female		unexposed	brong ahafo	rural	other	other	primary education	3	poorer	-60307		yes		yes	no	no	no	yes	no		yes, paid myself	yes, valid		yes	public/gov't	outpatient	national health insurance	no	yes	yes	yes	fair	easy	very satisfied	satisfied	satisfied
804	9732 2	GH6	97	32	usual resident	1379	women_GDHS_14.dta	brong ahafo rural	97	506288		35-39	female		unexposed	brong ahafo	rural	akan	christianity	none	0	poorer	-39874		no		yes	no	no	no	yes	no		yes, paid by a relative / friend	yes, valid		yes	public/gov't	outpatient	national health insurance	no	yes	yes	yes	very good	very easy	very satisfied	very satisfied	very satisfied
805	98 2 2	GH6	98	2	usual resident	1377	women_GDHS_14.dta	eastern urban	98	1276389		over44	female		unexposed	eastern	urban	other	christianity	secondary/higher	10	richer	41634		no		yes	no	no	no	yes	no		yes, paid by a relative / friend	yes, valid		yes	public/gov't	outpatient	national health insurance	no	yes	yes	yes	very good	very easy	satisfied	satisfied	satisfied
806	98 9 1	GH6	98	9	usual resident	1377	women_GDHS_14.dta	eastern urban	98	1276389		20-24	female		unexposed	eastern	urban	akan	christianity	secondary/higher	15	richest	94419		no		yes	no	no	no	yes	no		yes, paid myself	yes, valid		yes	public/gov't	outpatient	national health insurance	no	yes	yes	yes	good	easy	not satisfied	not satisfied	fairly satisfied
807	9814 1	GH6	98	14	usual resident	1377	women_GDHS_14.dta	eastern urban	98	1276389		25-29	female		unexposed	eastern	urban	akan	christianity	secondary/higher	12	richer	48974		no		yes	no	no	no	yes	no		yes, paid myself	yes, valid		yes	public/gov't	outpatient	national health insurance	no	yes	yes	yes	good	easy	fairly satisfied	satisfied	fairly satisfied
808	100 9 2	GH6	100	9	usual resident	1377	women_GDHS_14.dta	greater accra urban	100	1795704		15-19	female		unexposed	greater accra	urban	other	christianity	secondary/higher	8	richest	117601		no		yes	no	no	no	yes	no		yes, paid by a relative / friend	yes, valid		yes	public/gov't	outpatient	cash	yes	yes	yes	yes	good	very easy	very dissatisfied	satisfied	satisfied
809	10022 1	GH6	100	22	usual resident	1377	women_GDHS_14.dta	greater accra urban	100	1795704		40-44	female		unexposed	greater accra	urban	other	christianity	secondary/higher	15	richest	191312		no		yes	no	no	no	yes	no		yes, paid by employer/ssnit	yes, valid		yes	public/gov't	outpatient	cash	yes	yes	yes	yes	very good	very easy	very satisfied	very satisfied	satisfied
810	101 7 2	GH6	101	7	usual resident	1378	women_GDHS_14.dta	volta rural	101	694908		25-29	female		unexposed	volta	rural	ewe	christianity	secondary/higher	8	poorer	-30577		no		yes	no	no	no	yes	no		yes, paid myself	yes, valid		yes	public/gov't	outpatient	national health insurance	no	yes	yes	yes	very good	very easy	satisfied	satisfied	satisfied
811	10111 2	GH6	101	11	usual resident	1378	women_GDHS_14.dta	volta rural	101	694908		30-34	female		unexposed	volta	rural	ewe	christianity	primary education	6	middle	-21021		no		yes	no	no	no	yes	no		yes, paid myself	yes, valid		yes	public/gov't	outpatient	national health insurance	no	yes	yes	yes	good	easy	satisfied	satisfied	satisfied
812	10112 2	GH6	101	12	usual resident	1378	women_GDHS_14.dta	volta rural	101	694908		20-24	female		unexposed	volta	rural	ewe	christianity	secondary/higher	9	middle	12151		no		yes	no	no	no	yes	no		yes, paid by a relative / friend	yes, valid		yes	public/gov't	outpatient	national health insurance	no	yes	yes	yes	fair	difficult	fairly satisfied	not satisfied	not satisfied
813	10116 2	GH6	101	16	usual resident	1378	women_GDHS_14.dta	volta rural	101	694908		30-34	female		unexposed	volta	rural	ewe	christianity	secondary/higher	15	richer	40218		no		yes	no	no	no	yes	no		yes, paid myself	yes, valid		yes	public/gov't	outpatient	national health insurance	no	yes	yes	yes	good	fairly easy	fairly satisfied	fairly satisfied	fairly satisfied
814	10118 1	GH6	101	18	usual resident	1378	women_GDHS_14.dta	volta rural	101	694908		35-39	female		unexposed	volta	rural	ewe	christianity	secondary/higher	9	poorer	-42085		no		yes	no	no	no	yes	no		yes, paid myself	yes, valid		yes	private	outpatient	cash	yes	yes	yes	yes	good	very easy	very satisfied	very satisfied	very satisfied
815	10120 2	GH6	101	20	usual resident	1378	women_GDHS_14.dta	volta rural	101	694908		25-29	female		unexposed	volta	rural	ewe	christianity	secondary/higher	9	poorer	-42115		no		yes	no	no	no	yes	no		no, exempt as indigent	yes, valid		yes	public/gov't	outpatient	national health insurance	no	yes	yes	yes	good	fairly easy	satisfied	satisfied	fairly satisfied
816	10123 2	GH6	101	23	usual resident	1378	women_GDHS_14.dta	volta rural	101	694908		20-24	female		unexposed	volta	rural	ewe	christianity	secondary/higher	9	poorer	-36767		no		yes	no	no	no	yes	no		yes, paid myself	yes, valid		yes	private	outpatient	national health insurance	no	no	yes	yes	very good	very easy	very satisfied	very satisfied
817	10131 2	GH6	101	31	usual resident	1378	women_GDHS_14.dta	volta rural	101	694908		40-44	female		unexposed	volta	rural	ewe	christianity	secondary/higher	10	poorer	-38555		no		yes	no	no	no	yes	no		8	yes, valid		yes	public/gov't	outpatient	national health insurance	no	yes	yes	yes	very good	very easy	satisfied	satisfied
818	102 4 2	GH6	102	4	usual resident	1378	women_GDHS_14.dta	brong ahafo urban	102	758095		30-34	female		unexposed	brong ahafo	urban	other	christianity	primary education	6	richer	44988		no		yes	no	no	no	yes	no		yes, paid by a relative / friend	yes, valid		yes	public/gov't	outpatient	national health insurance	no	yes	yes	yes	very good	very easy	fairly satisfied	fairly satisfied	fairly satisfied
819	102 7 2	GH6	102	7	usual resident	1378	women_GDHS_14.dta	brong ahafo urban	102	758095		20-24	female		unexposed	brong ahafo	urban	akan	christianity	secondary/higher	8	richest	95412		yes		yes	no	no	no	yes	no		yes, paid by a relative / friend	yes, valid		yes	private	outpatient	national health insurance	no	yes	yes	yes	very good	very easy	very satisfied	very satisfied
820	10210 2	GH6	102	10	usual resident	1378	women_GDHS_14.dta	brong ahafo urban	102	758095		40-44	female		unexposed	brong ahafo	urban	akan	christianity	none	0	richer	44896		no		yes	no	no	no	yes	no		yes, paid myself	yes, valid		yes	public/gov't	outpatient	national health insurance	no	yes	yes	yes	poor	easy	fairly satisfied	fairly satisfied	fairly satisfied
821	10210 4	GH6	102	10	usual resident	1378	women_GDHS_14.dta	brong ahafo urban	102	758095		15-19	female		unexposed	brong ahafo	urban	akan	christianity	secondary/higher	12	richer	44896		no		yes	no	no	no	yes	no		yes, paid by a relative / friend	yes, valid		yes	public/gov't	outpatient	national health insurance	no	no	yes	yes	fair	easy	not satisfied	fairly satisfied
822	10212 2	GH6	102	12	usual resident	1378	women_GDHS_14.dta	brong ahafo urban	102	758095		30-34	female		unexposed	brong ahafo	urban	other	christianity	secondary/higher	15	richer	80304		no		yes	no	no	no	yes	no		yes, paid by a relative / friend	yes, valid		yes	public/gov't	outpatient	national health insurance	no	yes	yes	yes	good	difficult	very satisfied	satisfied	satisfied
823	10232 1	GH6	102	32	usual resident	1378	women_GDHS_14.dta	brong ahafo urban	102	758095		30-34	female		unexposed	brong ahafo	urban	akan	christianity	secondary/higher	7	richer	79671		no		yes	no	no	no	yes	no		yes, paid by a relative / friend	yes, valid		yes	public/gov't	outpatient	national health insurance	no	yes	yes	yes	good	easy	not satisfied	not satisfied
824	103 3 4	GH6	103	3	usual resident	1377	women_GDHS_14.dta	brong ahafo rural	103	837524		15-19	female		unexposed	brong ahafo	rural	other	christianity	primary education	4	poorer	-34284		no		yes	no	no	no	yes	no		yes, paid by a relative / friend	yes, valid		yes	public/gov't	outpatient	national health insurance	no	yes	yes	yes	good	very easy	fairly satisfied	satisfied
825	103 7 2	GH6	103	7	usual resident	1377	women_GDHS_14.dta	brong ahafo rural	103	837524		over44	female		unexposed	brong ahafo	rural	other	christianity	secondary/higher	7	middle	30124		no		yes	no	no	no	yes	no		yes, paid by a relative / friend	yes, valid		yes	public/gov't	outpatient	combination of any of the above	yes	no	no	no	fair	difficult	very dissatisfied	very dissatisfied
826	10328 2	GH6	103	28	usual resident	1377	women_GDHS_14.dta	brong ahafo rural	103	837524		40-44	female		unexposed	brong ahafo	rural	other	christianity	secondary/higher	10	richer	62740		no		yes	no	no	no	yes	no		yes, paid by employer/ssnit	yes, valid		yes	public/gov't	outpatient	national health insurance	no	yes	yes	yes	very good	very easy	very satisfied	very satisfied	satisfied
827	10330 1	GH6	103	30	usual resident	1377	women_GDHS_14.dta	brong ahafo rural	103	837524		40-44	female		unexposed	brong ahafo	rural	other	christianity	secondary/higher	10	middle	-12153		yes		yes	no	no	no	yes	no		yes, paid myself	yes, valid		yes	public/gov't	outpatient	national health insurance	no	yes	no	yes	very good	difficult	very dissatisfied	very satisfied
828	10333 3	GH6	103	33	usual resident	1377	women_GDHS_14.dta	brong ahafo rural	103	837524		20-24	female		unexposed	brong ahafo	rural	other	christianity	primary education	6	poorer	-57281		no		yes	no	no	no	yes	no		no, other	yes, valid		yes	public/gov't	outpatient	national health insurance	no	yes	yes	yes	very good	very easy	satisfied	satisfied	satisfied
829	10429 2	GH6	104	29	usual resident	1380	women_GDHS_14.dta	ashanti urban	104	2011078		25-29	female		exposed	ashanti	urban	mole_dagbani	christianity	secondary/higher	7	richest	95215		no		yes	no	no	no	yes	no		yes, paid myself	yes, valid		yes	public/gov't	outpatient	national health insurance	no	yes	yes	yes	good	easy	satisfied	satisfied
830	10515 3	GH6	105	15	usual resident	1379	women_GDHS_14.dta	volta urban	105	1434826		15-19	female		unexposed	volta	urban	ewe	christianity	secondary/higher	9	poorer	-49462		no		yes	no	no	no	yes	no		yes, paid by a relative / friend	yes, valid		yes	public/gov't	outpatient	national health insurance	no	yes	yes	no	fair	fairly easy	fairly satisfied	fairly satisfied	satisfied
831	10516 2	GH6	105	16	usual resident	1379	women_GDHS_14.dta	volta urban	105	1434826		25-29	female		unexposed	volta	urban	ewe	christianity	secondary/higher	12	richer	70133		no		yes	no	no	no	yes	no		yes, paid by a relative / friend	yes, valid		yes	public/gov't	outpatient	national health insurance	no	yes	yes	yes	fair	easy	satisfied	satisfied	very satisfied
832	10520 1	GH6	105	20	usual resident	1379	women_GDHS_14.dta	volta urban	105	1434826		20-24	female		unexposed	volta	urban	ewe	christianity	secondary/higher	8	middle	9350		no		yes	no	no	no	yes	no		yes, paid myself	yes, valid		yes	public/gov't	outpatient	national health insurance	no	yes	yes	yes	fair	easy	satisfied	very satisfied	satisfied
833	10526 1	GH6	105	26	usual resident	1379	women_GDHS_14.dta	volta urban	105	1434826		over44	female		unexposed	volta	urban	ewe	other	primary education	4	richer	41534		no		yes	no	no	no	yes	no		yes, paid myself	yes, valid		yes	public/gov't	outpatient	national health insurance	no	yes	yes	yes	fair	fairly easy	fairly satisfied	fairly satisfied	satisfied
834	107 5 2	GH6	107	5	usual resident	1379	women_GDHS_14.dta	volta rural	107	886274		25-29	female		unexposed	volta	rural	ewe	christianity	primary education	6	poorer	-65939		no		yes	no	no	no	yes	no		yes, paid myself	yes, valid		yes	public/gov't	outpatient	national health insurance	no	yes	yes	yes	good	fairly easy	fairly satisfied	fairly satisfied	fairly satisfied
835	107 6 5	GH6	107	6	visitor	1379	women_GDHS_14.dta	volta rural	107	886274		25-29	female		unexposed	volta	rural	ewe	christianity	primary education	5	poorest	-74763		no		yes	no	no	no	yes	no		no, exempt as indigent	yes, valid		yes	public/gov't	outpatient	cash	yes	yes	yes	yes	fair	difficult	satisfied	very satisfied	satisfied
836	107 7 2	GH6	107	7	usual resident	1379	women_GDHS_14.dta	volta rural	107	886274		30-34	female		unexposed	volta	rural	ewe	christianity	secondary/higher	7	poorest	-80177		no		yes	no	no	no	yes	no		yes, paid myself	yes, valid		yes	public/gov't	outpatient	combination of any of the above	yes	yes	yes	yes	fair	fairly easy	satisfied	satisfied	satisfied
837	107 8 2	GH6	107	8	usual resident	1379	women_GDHS_14.dta	volta rural	107	886274		25-29	female		unexposed	volta	rural	ewe	christianity	secondary/higher	9	poorer	-72720		no		yes	no	no	no	yes	no		yes, paid myself	yes, valid		yes	public/gov't	outpatient	national health insurance	no	yes	yes	yes	fair	easy	satisfied	fairly satisfied	fairly satisfied
838	10711 2	GH6	107	11	usual resident	1379	women_GDHS_14.dta	volta rural	107	886274		25-29	female		unexposed	volta	rural	ewe	christianity	primary education	3	poorer	-50452		no		yes	no	no	no	yes	no		yes, paid myself	yes, valid		yes	public/gov't	outpatient	national health insurance	no	yes	yes	yes	fair	fairly easy	fairly satisfied	satisfied	fairly satisfied
839	10714 3	GH6	107	14	usual resident	1379	women_GDHS_14.dta	volta rural	107	886274		15-19	female		unexposed	volta	rural	ewe	christianity	primary education	5	poorest	-129261		no		yes	no	no	no	yes	no		yes, paid by a relative / friend	yes, valid		yes	public/gov't	outpatient	national health insurance	no	yes	yes	no	fair	easy	not satisfied	fairly satisfied	fairly satisfied
840	10720 2	GH6	107	20	usual resident	1379	women_GDHS_14.dta	volta rural	107	886274		35-39	female		unexposed	volta	rural	ewe	christianity	primary education	6	poorest	-92405		no		yes	no	no	no	yes	no		yes, paid myself	yes, valid		yes	private	outpatient	national health insurance	no	yes	yes	yes	fair	fairly easy	fairly satisfied	fairly satisfied	not satisfied
841	10722 2	GH6	107	22	usual resident	1379	women_GDHS_14.dta	volta rural	107	886274		40-44	female		unexposed	volta	rural	ewe	christianity	secondary/higher	10	poorest	-84353		no		yes	no	no	no	yes	no		yes, paid myself	yes, valid		yes	private	outpatient	national health insurance	no	yes	yes	yes	good	fairly easy	satisfied	satisfied	fairly satisfied
842	10728 2	GH6	107	28	usual resident	1379	women_GDHS_14.dta	volta rural	107	886274		15-19	female		unexposed	volta	rural	ewe	christianity	secondary/higher	7	poorest	-86776		no		yes	no	no	no	yes	no		yes, paid by a relative / friend	yes, valid		yes	public/gov't	outpatient	national health insurance	no	yes	yes	no	good	easy	satisfied	satisfied	fairly satisfied
843	108 1 2	GH6	108	1	usual resident	1379	women_GDHS_14.dta	ashanti urban	108	1687620		30-34	female		exposed	ashanti	urban	other	christianity	primary education	5	richer	55298		no		yes	no	no	no	yes	no		yes, paid by a relative / friend	yes, valid		yes	public/gov't	outpatient	cash	yes	no	no	yes	good	fairly easy	fairly satisfied	fairly satisfied	fairly satisfied
844	10815 3	GH6	108	15	usual resident	1379	women_GDHS_14.dta	ashanti urban	108	1687620		15-19	female		exposed	ashanti	urban	akan	christianity	secondary/higher	9	richer	39622		no		yes	no	no	no	yes	no		yes, paid myself	yes, valid		yes	public/gov't	outpatient	national health insurance	no	yes	yes	yes	very good	very easy	satisfied	very satisfied	very satisfied
845	109 2 2	GH6	109	2	usual resident	1378	women_GDHS_14.dta	upper west urban	109	136815		25-29	female		unexposed	upper west	urban	other	christianity	secondary/higher	12	richer	49907		no		yes	no	no	no	yes	no		yes, paid by employer/ssnit	yes, valid		yes	public/gov't	outpatient	national health insurance	no	yes	yes	yes	good	easy	satisfied	satisfied	satisfied
846	109 6 1	GH6	109	6	usual resident	1378	women_GDHS_14.dta	upper west urban	109	136815		over44	female		unexposed	upper west	urban	mole_dagbani	christianity	secondary/higher	8	poorest	-76387		yes		yes	no	no	no	yes	no		yes, paid myself	yes, valid		yes	public/gov't	outpatient	national health insurance	no	yes	yes	yes	good	easy	satisfied	satisfied	satisfied
847	10914 2	GH6	109	14	usual resident	1378	women_GDHS_14.dta	upper west urban	109	136815		over44	female		unexposed	upper west	urban	mole_dagbani	christianity	none	0	middle	26939		yes		yes	no	no	no	yes	no		yes, paid by employer/ssnit	yes, valid		yes	public/gov't	outpatient	national health insurance	no	yes	yes	yes	good	easy	satisfied	satisfied	satisfied
848	10918 2	GH6	109	18	usual resident	1378	women_GDHS_14.dta	upper west urban	109	136815		30-34	female		unexposed	upper west	urban	akan	islam	primary education	4	middle	29821		no		yes	no	no	no	yes	no		yes, paid myself	yes, valid		yes	public/gov't	outpatient	national health insurance	no	yes	yes	yes	good	easy	satisfied	satisfied	fairly satisfied
849	10921 1	GH6	109	21	usual resident	1378	women_GDHS_14.dta	upper west urban	109	136815		25-29	female		unexposed	upper west	urban	mole_dagbani	christianity	secondary/higher	14	middle	2012		no		yes	no	no	no	yes	no		yes, paid myself	yes, valid		yes	public/gov't	outpatient	national health insurance	no	yes	yes	yes	fair	easy	not satisfied	not satisfied	not satisfied
850	10925 2	GH6	109	25	usual resident	1378	women_GDHS_14.dta	upper west urban	109	136815		25-29	female		unexposed	upper west	urban	mole_dagbani	christianity	none	0	poorest	-73913		no		yes	no	no	no	yes	no		yes, paid by a relative / friend	yes, valid		yes	public/gov't	outpatient	national health insurance	no	yes	yes	yes	good	easy	fairly satisfied	fairly satisfied	not satisfied
851	10926 2	GH6	109	26	usual resident	1378	women_GDHS_14.dta	upper west urban	109	136815		20-24	female		unexposed	upper west	urban	mole_dagbani	christianity	none	0	poorest	-127484		no		yes	no	no	no	yes	no		no, other	yes, valid		yes	public/gov't	outpatient	national health insurance	no	yes	no	yes	very good	very easy	very satisfied	very satisfied
852	10930 2	GH6	109	30	usual resident	1378	women_GDHS_14.dta	upper west urban	109	136815		25-29	female		unexposed	upper west	urban	other	islam	none	0	middle	-1325		no		yes	no	no	no	yes	no		yes, paid by a relative / friend	yes, valid		yes	public/gov't	outpatient	national health insurance	no	yes	yes	yes	good	easy	satisfied	satisfied	satisfied
853	10931 2	GH6	109	31	visitor	1378	women_GDHS_14.dta	upper west urban	109	136815		25-29	female		unexposed	upper west	urban	mole_dagbani	christianity	secondary/higher	14	richer	35815		no		yes	no	no	no	yes	no		yes, paid by a relative / friend	yes, valid		yes	public/gov't	outpatient	national health insurance	no	yes	yes	yes	good	easy	satisfied	satisfied	satisfied
854	11011 2	GH6	110	11	usual resident	1380	women_GDHS_14.dta	greater accra rural	110	1639355		20-24	female		unexposed	greater accra	rural	other	christianity	secondary/higher	9	poorer	-66881		no		yes	no	no	no	yes	no		yes, paid myself	yes, valid		yes	public/gov't	outpatient	national health insurance	no	yes	yes	yes	very good	easy	very satisfied	very satisfied	very satisfied
855	11017 2	GH6	110	17	usual resident	1380	women_GDHS_14.dta	greater accra rural	110	1639355		30-34	female		unexposed	greater accra	rural	other	islam	none	0	poorest	-108114		no		yes	no	no	no	yes	no		yes, paid by a relative / friend	yes, valid		yes	public/gov't	outpatient	national health insurance	no	yes	yes	yes	very good	very easy	very satisfied	very satisfied	very satisfied
856	11017 3	GH6	110	17	usual resident	1380	women_GDHS_14.dta	greater accra rural	110	1639355		25-29	female		unexposed	greater accra	rural	other	islam	none	0	poorest	-108114		no		yes	no	no	no	yes	no		yes, paid myself	yes, valid		yes	public/gov't	outpatient	national health insurance	no	yes	yes	yes	very good	very easy	very satisfied	very satisfied	very satisfied
857	11129 1	GH6	111	29	usual resident	1377	women_GDHS_14.dta	eastern rural	111	1415254		30-34	female		unexposed	eastern	rural	akan	christianity	secondary/higher	14	richer	78621		no		yes	no	no	no	yes	no		yes, paid myself	yes, valid		yes	public/gov't	outpatient	national health insurance	no	yes	yes	yes	fair	easy	satisfied	satisfied	satisfied
858	11130 2	GH6	111	30	usual resident	1377	women_GDHS_14.dta	eastern rural	111	1415254		35-39	female		unexposed	eastern	rural	akan	christianity	primary education	5	middle	9407		no		yes	no	no	no	yes	no		yes, paid by a relative / friend	yes, valid		yes	public/gov't	outpatient	national health insurance	no	yes	yes	yes	fair	easy	not satisfied	fairly satisfied	fairly satisfied
859	112 3 1	GH6	112	3	usual resident	1377	women_GDHS_14.dta	greater accra urban	112	3349671		30-34	female		unexposed	greater accra	urban	other	christianity	secondary/higher	9	richer	57313		no		yes	no	no	no	yes	no		yes, paid myself	yes, valid		yes	public/gov't	outpatient	cash	yes	yes	yes	yes	good	easy	not satisfied	not satisfied	not satisfied
860	112 9 1	GH6	112	9	usual resident	1377	women_GDHS_14.dta	greater accra urban	112	3349671		25-29	female		unexposed	greater accra	urban	other	christianity	secondary/higher	9	richer	56702		no		yes	no	no	no	yes	no		yes, paid myself	yes, valid		yes	public/gov't	outpatient	national health insurance	no	yes	no	yes	good	easy	satisfied	satisfied	satisfied
861	11217 1	GH6	112	17	usual resident	1377	women_GDHS_14.dta	greater accra urban	112	3349671		30-34	female		unexposed	greater accra	urban	other	christianity	secondary/higher	9	middle	-10491		no		yes	no	no	no	yes	no		yes, paid myself	yes, valid		yes	public/gov't	outpatient	national health insurance	no	no	no	yes	poor	easy	very dissatisfied	very dissatisfied	not satisfied
862	113 7 2	GH6	113	7	usual resident	1378	women_GDHS_14.dta	western urban	113	605119		35-39	female		unexposed	western	urban	akan	christianity	primary education	3	richer	49053		no		yes	no	no	no	yes	no		yes, paid myself	yes, valid		yes	private	outpatient	national health insurance	no	yes	yes	yes	very good	very easy	not satisfied	fairly satisfied	fairly satisfied
863	113 8 2	GH6	113	8	usual resident	1378	women_GDHS_14.dta	western urban	113	605119		40-44	female		unexposed	western	urban	ewe	christianity	none	0	richer	87487		no		yes	no	no	no	yes	no		yes, paid by a relative / friend	yes, valid		yes	private	outpatient	national health insurance	no	yes	yes	yes	poor	very easy	not satisfied	very dissatisfied	fairly satisfied
864	11317 1	GH6	113	17	usual resident	1378	women_GDHS_14.dta	western urban	113	605119		40-44	female		unexposed	western	urban	other	christianity	primary education	6	richer	82211		yes		yes	no	no	no	yes	no		yes, paid myself	yes, valid		yes	public/gov't	outpatient	cash	yes	yes	yes	yes	good	easy	fairly satisfied	fairly satisfied	fairly satisfied
865	11321 1	GH6	113	21	usual resident	1378	women_GDHS_14.dta	western urban	113	605119		30-34	female		unexposed	western	urban	akan	christianity	secondary/higher	14	richer	87713		no		yes	no	no	no	yes	no		yes, paid myself	yes, valid		yes	private	outpatient	national health insurance	no	yes	yes	yes	good	easy	very satisfied	very satisfied	satisfied
866	11322 2	GH6	113	22	usual resident	1378	women_GDHS_14.dta	western urban	113	605119		over44	female		unexposed	western	urban	akan	christianity	primary education	3	richest	118298		yes		yes	no	no	no	yes	no		yes, paid by a relative / friend	yes, valid		yes	public/gov't	outpatient	national health insurance	no	no	yes	yes	very good	easy	very dissatisfied	not satisfied	not satisfied
867	11332 1	GH6	113	32	usual resident	1378	women_GDHS_14.dta	western urban	113	605119		20-24	female		unexposed	western	urban	akan	christianity	secondary/higher	14	richest	150109		no		yes	no	no	no	yes	no		yes, paid myself	yes, valid		yes	private	outpatient	national health insurance	no	no	no	no	very good	very easy	very dissatisfied	not satisfied	not satisfied
868	114 3 1	GH6	114	3	usual resident	1378	women_GDHS_14.dta	ashanti urban	114	1422264		25-29	female		exposed	ashanti	urban	akan	christianity	secondary/higher	9	richest	117036		no		yes	no	no	no	yes	no		yes, paid by a relative / friend	yes, valid		yes	public/gov't	outpatient	combination of any of the above	yes	yes	yes	yes	good	fairly easy	fairly satisfied	fairly satisfied	fairly satisfied
869	11421 2	GH6	114	21	usual resident	1378	women_GDHS_14.dta	ashanti urban	114	1422264		30-34	female		exposed	ashanti	urban	akan	christianity	secondary/higher	9	richest	137094		no		yes	no	no	no	yes	no		yes, paid myself	yes, valid		yes	private	outpatient	national health insurance	no	yes	yes	yes	very good	very easy	very satisfied	very satisfied	very satisfied
870	11427 2	GH6	114	27	usual resident	1378	women_GDHS_14.dta	ashanti urban	114	1422264		30-34	female		exposed	ashanti	urban	akan	christianity	secondary/higher	12	richest	134069		no		yes	no	no	no	yes	no		yes, paid myself	yes, valid		yes	private	outpatient	national health insurance	no	yes	yes	yes	very good	very easy	very satisfied	very satisfied	very satisfied
871	11614 1	GH6	116	14	usual resident	1377	women_GDHS_14.dta	eastern urban	116	1086755		25-29	female		unexposed	eastern	urban	other	christianity	secondary/higher	12	richer	37767		no		yes	no	no	no	yes	no		yes, paid myself	yes, valid		yes	private	outpatient	cash	yes	yes	yes	yes	very good	easy	very satisfied	very satisfied	very satisfied
872	11618 2	GH6	116	18	usual resident	1377	women_GDHS_14.dta	eastern urban	116	1086755		25-29	female		unexposed	eastern	urban	akan	christianity	secondary/higher	12	middle	-12696		no		yes	no	no	no	yes	no		yes, paid by a relative / friend	yes, valid		yes	public/gov't	outpatient	national health insurance	no	yes	yes	yes	good	very easy	satisfied	satisfied	fairly satisfied
873	11625 1	GH6	116	25	usual resident	1377	women_GDHS_14.dta	eastern urban	116	1086755		25-29	female		unexposed	eastern	urban	other	christianity	secondary/higher	9	richest	101028		no		yes	no	no	no	yes	no		yes, paid by a relative / friend	yes, valid		yes	public/gov't	outpatient	national health insurance	no	yes	yes	yes	good	very easy	fairly satisfied	fairly satisfied	satisfied
874	11627 1	GH6	116	27	usual resident	1377	women_GDHS_14.dta	eastern urban	116	1086755		30-34	female		unexposed	eastern	urban	other	christianity	secondary/higher	12	richest	95285		no		yes	no	no	no	yes	no		yes, paid myself	yes, valid		yes	private	outpatient	national health insurance	no	yes	yes	no	good	very easy	not satisfied	satisfied	not satisfied
875	11631 1	GH6	116	31	usual resident	1377	women_GDHS_14.dta	eastern urban	116	1086755		40-44	female		unexposed	eastern	urban	other	christianity	secondary/higher	7	richest	105064		no		yes	no	no	no	yes	no		yes, paid myself	yes, valid		yes	public/gov't	outpatient	national health insurance	no	yes	yes	yes	good	very easy	fairly satisfied	fairly satisfied	satisfied
876	117 8 2	GH6	117	8	usual resident	1377	women_GDHS_14.dta	greater accra urban	117	2196144		15-19	female		unexposed	greater accra	urban	other	christianity	secondary/higher	7	richer	41706		no		yes	no	no	no	yes	no		yes, paid by a relative / friend	yes, valid		yes	public/gov't	outpatient	national health insurance	no	yes	yes	yes	good	easy	not satisfied	fairly satisfied	fairly satisfied
877	11723 2	GH6	117	23	usual resident	1377	women_GDHS_14.dta	greater accra urban	117	2196144		25-29	female		unexposed	greater accra	urban	other	christianity	none	0	richer	80347		no		yes	no	no	no	yes	no		yes, paid myself	yes, valid		yes	public/gov't	outpatient	cash	yes	yes	no	yes	very good	very easy	satisfied	satisfied	satisfied
878	118 1 1	GH6	118	1	usual resident	1378	women_GDHS_14.dta	eastern urban	118	630467		35-39	female		unexposed	eastern	urban	akan	christianity	secondary/higher	7	middle	23906		no		yes	no	no	no	yes	no		yes, paid myself	yes, valid		yes	public/gov't	outpatient	national health insurance	no	yes	yes	yes	good	fairly easy	fairly satisfied	very satisfied	very satisfied
879	118 2 1	GH6	118	2	usual resident	1378	women_GDHS_14.dta	eastern urban	118	630467		25-29	female		unexposed	eastern	urban	akan	christianity	secondary/higher	12	richest	95562		no		yes	no	no	no	yes	no		yes, paid by a relative / friend	yes, valid		yes	public/gov't	outpatient	national health insurance	no	yes	yes	yes	fair	very easy	satisfied	satisfied	fairly satisfied
880	118 4 1	GH6	118	4	usual resident	1378	women_GDHS_14.dta	eastern urban	118	630467		over44	female		unexposed	eastern	urban	akan	christianity	secondary/higher	10	middle	17244		no		yes	no	no	no	yes	no		yes, paid by a relative / friend	yes, valid		yes	public/gov't	outpatient	national health insurance	no	yes	yes	yes	good	easy	fairly satisfied	fairly satisfied	satisfied
881	11815 4	GH6	118	15	usual resident	1378	women_GDHS_14.dta	eastern urban	118	630467		15-19	female		unexposed	eastern	urban	akan	christianity	secondary/higher	9	richer	56536		no		yes	no	no	no	yes	no		yes, paid by a relative / friend	yes, valid		yes	public/gov't	outpatient	national health insurance	no	yes	yes	yes	good	very easy	satisfied	satisfied	fairly satisfied
882	11819 1	GH6	118	19	usual resident	1378	women_GDHS_14.dta	eastern urban	118	630467		30-34	female		unexposed	eastern	urban	akan	christianity	secondary/higher	9	richer	65219		no		yes	no	no	no	yes	no		yes, paid myself	yes, valid		yes	public/gov't	outpatient	national health insurance	no	yes	yes	yes	very good	very easy	not satisfied	not satisfied	fairly satisfied
883	11820 1	GH6	118	20	usual resident	1378	women_GDHS_14.dta	eastern urban	118	630467		25-29	female		unexposed	eastern	urban	akan	christianity	secondary/higher	12	richest	107291		no		yes	no	no	no	yes	no		yes, paid myself	yes, valid		yes	public/gov't	outpatient	national health insurance	no	yes	yes	no	good	easy	very satisfied	satisfied	satisfied
884	119 2 2	GH6	119	2	usual resident	1379	women_GDHS_14.dta	eastern rural	119	923799		25-29	female		unexposed	eastern	rural	akan	christianity	secondary/higher	9	poorer	-39563		no		yes	no	no	no	yes	no		yes, paid by a relative / friend	yes, valid		yes	public/gov't	outpatient	national health insurance	no	yes	yes	yes	very good	easy	very satisfied	satisfied	satisfied
885	11926 1	GH6	119	26	usual resident	1379	women_GDHS_14.dta	eastern rural	119	923799		30-34	female		unexposed	eastern	rural	akan	christianity	primary education	6	middle	-11668		no		yes	no	no	no	yes	no		yes, paid myself	yes, valid		yes	public/gov't	outpatient	cash	yes	yes	yes	yes	good	easy	not satisfied	fairly satisfied	satisfied
886	120 6 1	GH6	120	6	usual resident	1377	women_GDHS_14.dta	western urban	120	1165604		over44	female		unexposed	western	urban	akan	christianity	secondary/higher	7	middle	12141		no		yes	no	no	no	yes	no		yes, paid myself	yes, valid		yes	public/gov't	outpatient	national health insurance	no	yes	yes	yes	fair	fairly easy	fairly satisfied	satisfied	satisfied
887	12011 1	GH6	120	11	usual resident	1377	women_GDHS_14.dta	western urban	120	1165604		40-44	female		unexposed	western	urban	akan	christianity	primary education	5	richer	35999		no		yes	no	no	no	yes	no		yes, paid myself	yes, valid		yes	public/gov't	outpatient	national health insurance	no	yes	yes	yes	good	easy	very satisfied	very satisfied	very satisfied
888	12014 2	GH6	120	14	usual resident	1377	women_GDHS_14.dta	western urban	120	1165604		25-29	female		unexposed	western	urban	akan	christianity	secondary/higher	8	richest	101456		no		yes	no	no	no	yes	no		yes, paid by a relative / friend	yes, valid		yes	public/gov't	outpatient	national health insurance	no	yes	yes	yes	good	very easy	very satisfied	very satisfied	very satisfied
889	12018 2	GH6	120	18	usual resident	1377	women_GDHS_14.dta	western urban	120	1165604		30-34	female		unexposed	western	urban	akan	christianity	secondary/higher	9	richest	127179		yes		yes	no	no	no	yes	no		yes, paid myself	yes, valid		yes	public/gov't	outpatient	national health insurance	no	yes	yes	yes	fair	easy	satisfied	fairly satisfied	satisfied
890	12025 2	GH6	120	25	usual resident	1377	women_GDHS_14.dta	western urban	120	1165604		40-44	female		unexposed	western	urban	akan	christianity	secondary/higher	10	richest	106411		no		yes	no	no	no	yes	no		yes, paid myself	yes, valid		yes	public/gov't	outpatient	national health insurance	no	yes	yes	yes	good	very easy	satisfied	very satisfied	very satisfied
891	12026 1	GH6	120	26	usual resident	1377	women_GDHS_14.dta	western urban	120	1165604		30-34	female		unexposed	western	urban	akan	christianity	secondary/higher	9	richer	59194		no		yes	no	no	no	yes	no		yes, paid by a relative / friend	yes, valid		yes	public/gov't	outpatient	cash	yes	yes	yes	yes	poor	easy	not satisfied	very dissatisfied	very dissatisfied
892	12027 2	GH6	120	27	usual resident	1377	women_GDHS_14.dta	western urban	120	1165604		25-29	female		unexposed	western	urban	akan	christianity	secondary/higher	9	richest	95175		no		yes	no	no	no	yes	no		yes, paid by a relative / friend	yes, valid		yes	public/gov't	outpatient	national health insurance	no	yes	yes	yes	very good	easy	not satisfied	very dissatisfied	satisfied
893	121 2 1	GH6	121	2	usual resident	1378	women_GDHS_14.dta	central rural	121	810681		over44	female		unexposed	central	rural	akan	christianity	secondary/higher	10	middle	28231		no		yes	no	no	no	yes	no		yes, paid myself	yes, valid		yes	public/gov't	outpatient	national health insurance	no	yes	yes	yes	good	easy	satisfied	satisfied	satisfied
894	121 2 2	GH6	121	2	usual resident	1378	women_GDHS_14.dta	central rural	121	810681		15-19	female		unexposed	central	rural	akan	christianity	secondary/higher	10	middle	28231		no		yes	no	no	no	yes	no		yes, paid by a relative / friend	yes, valid		yes	public/gov't	outpatient	national health insurance	no	yes	yes	yes	good	very easy	satisfied	satisfied	fairly satisfied
895	12123 1	GH6	121	23	usual resident	1378	women_GDHS_14.dta	central rural	121	810681		over44	female		unexposed	central	rural	akan	christianity	secondary/higher	10	richer	40044		yes		yes	no	no	no	yes	no		yes, paid myself	yes, valid		yes	public/gov't	outpatient	national health insurance	no	yes	yes	yes	good	very easy	satisfied	satisfied	satisfied
896	12127 2	GH6	121	27	usual resident	1378	women_GDHS_14.dta	central rural	121	810681		25-29	female		unexposed	central	rural	akan	christianity	secondary/higher	12	richer	92965		no		yes	no	no	no	yes	no		yes, paid myself	yes, valid		yes	public/gov't	outpatient	national health insurance	no	yes	yes	yes	very good	very easy	fairly satisfied	satisfied	satisfied
897	122 3 2	GH6	122	3	usual resident	1380	women_GDHS_14.dta	brong ahafo urban	122	924091		35-39	female		unexposed	brong ahafo	urban	other	islam	secondary/higher	9	richer	37744		no		yes	no	no	no	yes	no		yes, paid myself	yes, valid		yes	public/gov't	outpatient	national health insurance	no	yes	yes	yes	good	very easy	satisfied	satisfied
898	12210 2	GH6	122	10	usual resident	1380	women_GDHS_14.dta	brong ahafo urban	122	924091		20-24	female		unexposed	brong ahafo	urban	akan	christianity	primary education	5	richer	36656		no		yes	no	no	no	yes	no		yes, paid myself	yes, valid		yes	public/gov't	outpatient	national health insurance	no	yes	yes	yes	good	easy	satisfied	fairly satisfied
899	12217 1	GH6	122	17	usual resident	1380	women_GDHS_14.dta	brong ahafo urban	122	924091		35-39	female		unexposed	brong ahafo	urban	akan	christianity	secondary/higher	9	richer	54100		no		yes	no	no	no	yes	no		yes, paid by a relative / friend	yes, valid		yes	public/gov't	outpatient	national health insurance	no	no	yes	yes	fair	easy	fairly satisfied	fairly satisfied	not satisfied
900	12218 1	GH6	122	18	usual resident	1380	women_GDHS_14.dta	brong ahafo urban	122	924091		20-24	female		unexposed	brong ahafo	urban	akan	christianity	secondary/higher	12	richer	63565		no		yes	no	no	no	yes	no		yes, paid myself	yes, valid		yes	private	outpatient	national health insurance	no	yes	yes	yes	very good	very easy	very satisfied	very satisfied
901	12219 2	GH6	122	19	usual resident	1380	women_GDHS_14.dta	brong ahafo urban	122	924091		40-44	female		unexposed	brong ahafo	urban	akan	christianity	secondary/higher	10	richest	110264		no		yes	no	no	no	yes	no		yes, paid myself	yes, valid		yes	public/gov't	outpatient	national health insurance	no	yes	yes	yes	very good	very easy	satisfied	very satisfied	satisfied
902	12220 2	GH6	122	20	usual resident	1380	women_GDHS_14.dta	brong ahafo urban	122	924091		35-39	female		unexposed	brong ahafo	urban	mole_dagbani	islam	primary education	3	middle	6290		no		yes	no	no	no	yes	no		yes, paid by a relative / friend	yes, valid		yes	public/gov't	outpatient	national health insurance	no	yes	yes	yes	good	easy	fairly satisfied	satisfied	fairly satisfied
903	12221 2	GH6	122	21	usual resident	1380	women_GDHS_14.dta	brong ahafo urban	122	924091		40-44	female		unexposed	brong ahafo	urban	akan	christianity	secondary/higher	8	richer	50879		no		yes	no	no	no	yes	no		yes, paid myself	yes, valid		yes	public/gov't	outpatient	national health insurance	no	yes	yes	yes	good	easy	satisfied	fairly satisfied	fairly satisfied
904	12222 1	GH6	122	22	usual resident	1380	women_GDHS_14.dta	brong ahafo urban	122	924091		25-29	female		unexposed	brong ahafo	urban	akan	christianity	secondary/higher	9	richer	42441		no		yes	no	no	no	yes	no		yes, paid myself	yes, valid		yes	public/gov't	outpatient	cash	yes	yes	yes	yes	very good	very easy	very satisfied	very satisfied	satisfied
905	12224 1	GH6	122	24	usual resident	1380	women_GDHS_14.dta	brong ahafo urban	122	924091		30-34	female		unexposed	brong ahafo	urban	akan	christianity	secondary/higher	9	middle	17351		no		yes	no	no	no	yes	no		yes, paid myself	yes, valid		yes	public/gov't	outpatient	national health insurance	no	yes	yes	yes	good	easy	fairly satisfied	fairly satisfied	satisfied
906	12226 1	GH6	122	26	usual resident	1380	women_GDHS_14.dta	brong ahafo urban	122	924091		35-39	female		unexposed	brong ahafo	urban	akan	christianity	secondary/higher	9	middle	29455		no		yes	no	no	no	yes	no		yes, paid myself	yes, valid		yes	public/gov't	outpatient	national health insurance	no	yes	yes	yes	good	easy	fairly satisfied	satisfied	fairly satisfied
907	12232 2	GH6	122	32	usual resident	1380	women_GDHS_14.dta	brong ahafo urban	122	924091		20-24	female		unexposed	brong ahafo	urban	mole_dagbani	islam	primary education	5	middle	14344		no		yes	no	no	no	yes	no		yes, paid by a relative / friend	yes, valid		yes	private	outpatient	national health insurance	no	yes	yes	yes	good	very easy	satisfied	satisfied	very satisfied
908	12233 2	GH6	122	33	usual resident	1380	women_GDHS_14.dta	brong ahafo urban	122	924091		20-24	female		unexposed	brong ahafo	urban	akan	christianity	secondary/higher	7	middle	20358		no		yes	no	no	no	yes	no		yes, paid by a relative / friend	yes, valid		yes	public/gov't	outpatient	national health insurance	no	yes	yes	yes	good	very easy	satisfied	fairly satisfied
909	12329 3	GH6	123	29	usual resident	1378	women_GDHS_14.dta	greater accra rural	123	713229		20-24	female		unexposed	greater accra	rural	akan	christianity	secondary/higher	12	middle	-16191		no		yes	no	no	no	yes	no		yes, paid by a relative / friend	yes, valid		yes	private	outpatient	national health insurance	no	yes	yes	yes	good	difficult	very dissatisfied	satisfied	satisfied
910	12413 2	GH6	124	13	usual resident	1378	women_GDHS_14.dta	greater accra rural	124	1339558		25-29	female		unexposed	greater accra	rural	akan	christianity	secondary/higher	12	richer	86343		no		yes	no	no	no	yes	no		yes, paid myself	yes, valid		yes	public/gov't	outpatient	national health insurance	no	yes	yes	yes	good	easy	satisfied	satisfied	satisfied
911	12416 6	GH6	124	16	usual resident	1378	women_GDHS_14.dta	greater accra rural	124	1339558		20-24	female		unexposed	greater accra	rural	akan	christianity	secondary/higher	12	richer	57140		no		yes	no	no	no	yes	no		yes, paid by a relative / friend	yes, valid		yes	public/gov't	outpatient	national health insurance	no	yes	yes	yes	good	easy	very satisfied	very satisfied	very satisfied
912	12511 1	GH6	125	11	usual resident	1379	women_GDHS_14.dta	brong ahafo urban	125	802141		over44	female		unexposed	brong ahafo	urban	other	islam	none	0	richer	87605		yes		yes	no	no	no	yes	no		yes, paid myself	yes, valid		yes	public/gov't	outpatient	national health insurance	no	yes	yes	yes	good	very easy	satisfied	satisfied
913	12521 2	GH6	125	21	usual resident	1379	women_GDHS_14.dta	brong ahafo urban	125	802141		30-34	female		unexposed	brong ahafo	urban	akan	christianity	secondary/higher	9	richer	41704		yes		yes	no	no	no	yes	no		yes, paid by a relative / friend	yes, valid		yes	private	outpatient	national health insurance	no	yes	yes	yes	very good	easy	very satisfied	very satisfied
914	12523 1	GH6	125	23	usual resident	1379	women_GDHS_14.dta	brong ahafo urban	125	802141		over44	female		unexposed	brong ahafo	urban	akan	christianity	secondary/higher	10	richest	162833		no		yes	no	no	no	yes	no		yes, paid myself	yes, valid		yes	public/gov't	outpatient	national health insurance	no	yes	yes	yes	very good	very easy	very satisfied	very satisfied	very satisfied
915	12524 1	GH6	125	24	usual resident	1379	women_GDHS_14.dta	brong ahafo urban	125	802141		35-39	female		unexposed	brong ahafo	urban	akan	christianity	none	0	middle	17893		no		yes	no	no	no	yes	no		yes, paid by a relative / friend	yes, valid		yes	private	outpatient	national health insurance	no	yes	yes	yes	good	easy	very satisfied	very satisfied	fairly satisfied
916	12528 1	GH6	125	28	usual resident	1379	women_GDHS_14.dta	brong ahafo urban	125	802141		35-39	female		unexposed	brong ahafo	urban	akan	christianity	secondary/higher	9	richest	130518		yes		yes	no	no	no	yes	no		yes, paid by a relative / friend	yes, valid		yes	public/gov't	outpatient	national health insurance	no	yes	yes	yes	very good	difficult	not satisfied	not satisfied
917	12531 1	GH6	125	31	usual resident	1379	women_GDHS_14.dta	brong ahafo urban	125	802141		25-29	female		unexposed	brong ahafo	urban	akan	christianity	secondary/higher	12	richest	122770		no		yes	no	no	no	yes	no		yes, paid by a relative / friend	yes, valid		yes	public/gov't	outpatient	cash	yes	yes	yes	yes	good	very easy	satisfied	satisfied	satisfied
918	12532 1	GH6	125	32	usual resident	1379	women_GDHS_14.dta	brong ahafo urban	125	802141		35-39	female		unexposed	brong ahafo	urban	akan	islam	none	0	richer	34877		no		yes	no	no	no	yes	no		yes, paid by a relative / friend	yes, valid		yes	public/gov't	outpatient	national health insurance	no	yes	yes	yes	good	easy	very satisfied	very satisfied	very satisfied
919	126 1 2	GH6	126	1	usual resident	1377	women_GDHS_14.dta	central urban	126	554402		35-39	female		unexposed	central	urban	akan	christianity	none	0	poorer	-28454		no		yes	no	no	no	yes	no		yes, paid by a relative / friend	yes, valid		yes	public/gov't	outpatient	national health insurance	no	yes	yes	yes	very good	very easy	not satisfied	satisfied	very satisfied
920	126 6 2	GH6	126	6	usual resident	1377	women_GDHS_14.dta	central urban	126	554402		over44	female		unexposed	central	urban	akan	christianity	none	0	poorer	-28482		no		yes	no	no	no	yes	no		yes, paid myself	yes, valid		yes	public/gov't	outpatient	cash	yes	yes	no	yes	good	easy	not satisfied	satisfied	satisfied
921	12618 2	GH6	126	18	usual resident	1377	women_GDHS_14.dta	central urban	126	554402		20-24	female		unexposed	central	urban	akan	christianity	secondary/higher	9	poorest	-75753		no		yes	no	no	no	yes	no		yes, paid by a relative / friend	yes, valid		yes	public/gov't	outpatient	combination of any of the above	yes	yes	yes	yes	very good	very easy	satisfied	satisfied	satisfied
922	12624 3	GH6	126	24	usual resident	1377	women_GDHS_14.dta	central urban	126	554402		25-29	female		unexposed	central	urban	akan	christianity	none	0	poorer	-38252		no		yes	no	no	no	yes	no		8	yes, valid		yes	public/gov't	outpatient	national health insurance	no	yes	yes	yes	good	very easy	fairly satisfied	satisfied	very dissatisfied
923	12729 2	GH6	127	29	usual resident	1379	women_GDHS_14.dta	greater accra urban	127	1590803		20-24	female		unexposed	greater accra	urban	akan	christianity	secondary/higher	7	richest	99656		no		yes	no	no	no	yes	no		yes, paid by a relative / friend	yes, valid		yes	public/gov't	outpatient	national health insurance	no	yes	yes	yes	very good	very easy	satisfied	satisfied	satisfied
924	128 7 1	GH6	128	7	usual resident	1377	women_GDHS_14.dta	brong ahafo urban	128	890211		35-39	female		unexposed	brong ahafo	urban	other	islam	none	0	richer	56115		no		yes	no	no	no	yes	no		yes, paid myself	yes, valid		yes	public/gov't	outpatient	cash	yes	yes	yes	yes	good	easy	satisfied	satisfied	satisfied
925	12812 1	GH6	128	12	usual resident	1377	women_GDHS_14.dta	brong ahafo urban	128	890211		35-39	female		unexposed	brong ahafo	urban	other	islam	none	0	poorer	-34612		no		yes	no	no	no	yes	no		yes, paid by a relative / friend	yes, valid		yes	public/gov't	outpatient	national health insurance	no	yes	yes	yes	good	easy	fairly satisfied	satisfied	satisfied
926	12816 2	GH6	128	16	usual resident	1377	women_GDHS_14.dta	brong ahafo urban	128	890211		30-34	female		unexposed	brong ahafo	urban	other	islam	primary education	6	middle	3638		no		yes	no	no	no	yes	no		yes, paid myself	yes, valid		yes	public/gov't	outpatient	national health insurance	no	yes	yes	yes	good	easy	fairly satisfied	fairly satisfied	fairly satisfied
927	12817 2	GH6	128	17	usual resident	1377	women_GDHS_14.dta	brong ahafo urban	128	890211		25-29	female		unexposed	brong ahafo	urban	other	islam	primary education	2	middle	20507		no		yes	no	no	no	yes	no		yes, paid myself	yes, valid		yes	public/gov't	outpatient	national health insurance	no	yes	yes	yes	good	easy	fairly satisfied	satisfied	fairly satisfied
928	12822 1	GH6	128	22	usual resident	1377	women_GDHS_14.dta	brong ahafo urban	128	890211		25-29	female		unexposed	brong ahafo	urban	akan	christianity	secondary/higher	9	richest	166751		no		yes	no	no	no	yes	no		yes, paid by a relative / friend	yes, valid		yes	private	outpatient	national health insurance	no	yes	yes	yes	good	fairly easy	fairly satisfied	satisfied
929	12924 2	GH6	129	24	usual resident	1377	women_GDHS_14.dta	greater accra urban	129	2159645		35-39	female		unexposed	greater accra	urban	akan	christianity	secondary/higher	12	richest	147543		no		yes	no	no	no	yes	no		yes, paid by a relative / friend	yes, valid		yes	private	outpatient	national health insurance	no	yes	yes	yes	very good	very easy	satisfied	satisfied	satisfied
930	13013 1	GH6	130	13	usual resident	1377	women_GDHS_14.dta	central rural	130	788705		40-44	female		unexposed	central	rural	akan	christianity	none	0	poorer	-52541		no		yes	no	no	no	yes	no		yes, paid by a relative / friend	yes, valid		yes	public/gov't	outpatient	national health insurance	no	yes	yes	yes	good	very easy	fairly satisfied	satisfied	satisfied
931	13017 4	GH6	130	17	usual resident	1377	women_GDHS_14.dta	central rural	130	788705		15-19	female		unexposed	central	rural	akan	christianity	secondary/higher	8	poorer	-45515		no		yes	no	no	no	yes	no		yes, paid by a relative / friend	yes, valid		yes	public/gov't	outpatient	national health insurance	no	yes	yes	yes	good	easy	satisfied	satisfied
932	13026 2	GH6	130	26	usual resident	1377	women_GDHS_14.dta	central rural	130	788705		25-29	female		unexposed	central	rural	akan	christianity	secondary/higher	9	middle	-24164		no		yes	no	no	no	yes	no		yes, paid by a relative / friend	yes, valid		yes	public/gov't	outpatient	cash	yes	yes	yes	yes	fair	easy	fairly satisfied	satisfied	satisfied
933	13027 4	GH6	130	27	usual resident	1377	women_GDHS_14.dta	central rural	130	788705		20-24	female		unexposed	central	rural	akan	christianity	secondary/higher	9	middle	2847		no		yes	no	no	no	yes	no		yes, paid by a relative / friend	yes, valid		yes	public/gov't	outpatient	national health insurance	no	yes	yes	yes	good	easy	not satisfied	fairly satisfied	fairly satisfied
934	13031 2	GH6	130	31	visitor	1377	women_GDHS_14.dta	central rural	130	788705		over44	female		unexposed	central	rural	akan	christianity	secondary/higher	14	richer	59450		no		yes	no	no	no	yes	no		yes, paid myself	yes, valid		yes	public/gov't	outpatient	national health insurance	no	yes	yes	yes	good	easy	fairly satisfied	fairly satisfied
935	131 7 1	GH6	131	7	usual resident	1378	women_GDHS_14.dta	volta rural	131	847641		over44	female		unexposed	volta	rural	other	islam	none	0	poorest	-98203		no		yes	no	no	no	yes	no		yes, paid myself	yes, valid		yes	public/gov't	outpatient	cash	yes	no	no	yes	fair	difficult	not satisfied	fairly satisfied	not satisfied
936	13123 2	GH6	131	23	usual resident	1378	women_GDHS_14.dta	volta rural	131	847641		25-29	female		unexposed	volta	rural	ewe	christianity	primary education	3	poorer	-66648		no		yes	no	no	no	yes	no		8	yes, valid		yes	public/gov't	outpatient	national health insurance	no	yes	yes	yes	fair	fairly easy	not satisfied	not satisfied	not satisfied
937	132 3 2	GH6	132	3	usual resident	1379	women_GDHS_14.dta	eastern urban	132	1253560		30-34	female		unexposed	eastern	urban	akan	christianity	secondary/higher	9	richest	123402		no		yes	no	no	no	yes	no		yes, paid by a relative / friend	yes, valid		yes	public/gov't	outpatient	cash	yes	yes	yes	yes	very good	easy	satisfied	satisfied	very satisfied
938	132 7 2	GH6	132	7	usual resident	1379	women_GDHS_14.dta	eastern urban	132	1253560		over44	female		unexposed	eastern	urban	ewe	christianity	none	0	poorer	-68477		no		yes	no	no	no	yes	no		yes, paid by a relative / friend	yes, valid		yes	public/gov't	outpatient	cash	yes	yes	yes	yes	fair	very easy	fairly satisfied	satisfied
939	132 9 1	GH6	132	9	usual resident	1379	women_GDHS_14.dta	eastern urban	132	1253560		40-44	female		unexposed	eastern	urban	akan	christianity	primary education	5	middle	-2773		no		yes	no	no	no	yes	no		yes, paid myself	yes, valid		yes	public/gov't	outpatient	national health insurance	no	yes	yes	yes	very good	easy	very satisfied	very satisfied	satisfied
940	13211 1	GH6	132	11	usual resident	1379	women_GDHS_14.dta	eastern urban	132	1253560		25-29	female		unexposed	eastern	urban	akan	christianity	secondary/higher	14	richest	168834		no		yes	no	no	no	yes	no		yes, paid myself	yes, valid		yes	public/gov't	outpatient	national health insurance	no	yes	yes	yes	very good	very easy	very satisfied	very satisfied	very satisfied
941	13212 1	GH6	132	12	usual resident	1379	women_GDHS_14.dta	eastern urban	132	1253560		over44	female		unexposed	eastern	urban	akan	christianity	primary education	3	middle	-21297		yes		yes	no	no	no	yes	no		yes, paid by a relative / friend	yes, valid		yes	public/gov't	outpatient	national health insurance	no	yes	yes	yes	good	very easy	fairly satisfied	satisfied	fairly satisfied
942	133 3 3	GH6	133	3	usual resident	1377	women_GDHS_14.dta	brong ahafo rural	133	697435		30-34	female		unexposed	brong ahafo	rural	akan	christianity	secondary/higher	13	middle	20077		no		yes	no	no	no	yes	no		yes, paid myself	yes, valid		yes	private	outpatient	national health insurance	no	yes	yes	yes	very good	very easy	satisfied	satisfied	fairly satisfied
943	133 5 2	GH6	133	5	usual resident	1377	women_GDHS_14.dta	brong ahafo rural	133	697435		over44	female		unexposed	brong ahafo	rural	other	islam	none	0	poorer	-54171		no		yes	no	no	no	yes	no		yes, paid by a relative / friend	yes, valid		yes	public/gov't	outpatient	national health insurance	no	yes	no	yes	good	easy	fairly satisfied	satisfied	satisfied
944	133 7 2	GH6	133	7	usual resident	1377	women_GDHS_14.dta	brong ahafo rural	133	697435		15-19	female		unexposed	brong ahafo	rural	akan	islam	secondary/higher	8	poorer	-51723		no		yes	no	no	no	yes	no		yes, paid by a relative / friend	yes, valid		yes	public/gov't	outpatient	national health insurance	no	yes	yes	yes	very good	very easy	very satisfied	very satisfied	very satisfied
945	13315 2	GH6	133	15	usual resident	1377	women_GDHS_14.dta	brong ahafo rural	133	697435		35-39	female		unexposed	brong ahafo	rural	mole_dagbani	christianity	none	0	poorer	-44044		no		yes	no	no	no	yes	no		yes, paid by a relative / friend	yes, valid		yes	public/gov't	outpatient	cash	yes	yes	no	yes	very good	easy	very satisfied	satisfied	satisfied
946	13321 2	GH6	133	21	usual resident	1377	women_GDHS_14.dta	brong ahafo rural	133	697435		35-39	female		unexposed	brong ahafo	rural	akan	christianity	primary education	4	poorer	-62004		no		yes	no	no	no	yes	no		8	yes, valid		yes	public/gov't	outpatient	national health insurance	no	yes	no	yes	good	easy	not satisfied	fairly satisfied	fairly satisfied
947	13516 2	GH6	135	16	usual resident	1377	women_GDHS_14.dta	brong ahafo rural	135	933229		40-44	female		unexposed	brong ahafo	rural	other	islam	none	0	poorer	-72442		no		yes	no	no	no	yes	no		yes, paid by a relative / friend	yes, valid		yes	public/gov't	outpatient	national health insurance	no	yes	yes	yes	good	easy	fairly satisfied	fairly satisfied
948	13519 2	GH6	135	19	usual resident	1377	women_GDHS_14.dta	brong ahafo rural	135	933229		35-39	female		unexposed	brong ahafo	rural	akan	christianity	secondary/higher	9	richer	48004		no		yes	no	no	no	yes	no		yes, paid myself	yes, valid		yes	public/gov't	outpatient	national health insurance	no	yes	yes	yes	good	easy	satisfied	satisfied	satisfied
949	13521 2	GH6	135	21	usual resident	1377	women_GDHS_14.dta	brong ahafo rural	135	933229		40-44	female		unexposed	brong ahafo	rural	akan	christianity	secondary/higher	9	middle	26697		no		yes	no	no	no	yes	no		yes, paid myself	yes, valid		yes	public/gov't	outpatient	national health insurance	no	yes	yes	yes	good	easy	satisfied	satisfied	fairly satisfied
950	13523 2	GH6	135	23	visitor	1377	women_GDHS_14.dta	brong ahafo rural	135	933229		25-29	female		unexposed	brong ahafo	rural	mole_dagbani	christianity	secondary/higher	9	poorer	-56536		no		yes	no	no	no	yes	no		8	yes, valid		yes	private	outpatient	national health insurance	no	yes	yes	yes	very good	very easy	very satisfied	very satisfied	very satisfied
951	13525 1	GH6	135	25	usual resident	1377	women_GDHS_14.dta	brong ahafo rural	135	933229		35-39	female		unexposed	brong ahafo	rural	akan	christianity	secondary/higher	9	richer	36727		no		yes	no	no	no	yes	no		yes, paid myself	yes, valid		yes	public/gov't	outpatient	national health insurance	no	yes	yes	yes	good	easy	satisfied	satisfied	fairly satisfied
952	136 6 2	GH6	136	6	usual resident	1380	women_GDHS_14.dta	greater accra urban	136	1941965		30-34	female		unexposed	greater accra	urban	akan	christianity	secondary/higher	16	richest	219804		no		yes	no	no	no	yes	no		yes, paid by employer/ssnit	yes, valid		yes	public/gov't	outpatient	combination of any of the above	yes	yes	yes	yes	good	easy	satisfied	satisfied	fairly satisfied
953	13613 2	GH6	136	13	usual resident	1380	women_GDHS_14.dta	greater accra urban	136	1941965		30-34	female		unexposed	greater accra	urban	akan	christianity	secondary/higher	15	richest	168287		yes		yes	no	no	no	yes	no		yes, paid by employer/ssnit	yes, valid		yes	public/gov't	outpatient	national health insurance	no	yes	yes	yes	very good	very easy	not satisfied	satisfied	satisfied
954	13630 2	GH6	136	30	usual resident	1380	women_GDHS_14.dta	greater accra urban	136	1941965		30-34	female		unexposed	greater accra	urban	akan	christianity	secondary/higher	16	richest	208628		no		yes	no	no	no	yes	no		8	yes, valid		yes	private	outpatient	national health insurance	no	yes	yes	yes	very good	very easy	satisfied	very satisfied	very satisfied
955	13630 7	GH6	136	30	usual resident	1380	women_GDHS_14.dta	greater accra urban	136	1941965		20-24	female		unexposed	greater accra	urban	other	christianity	none	0	richest	208628		no		yes	no	no	no	yes	no		yes, paid by a relative / friend	yes, valid		yes	public/gov't	outpatient	cash	yes	yes	yes	yes	very good	very easy	satisfied	satisfied	satisfied
956	13633 2	GH6	136	33	usual resident	1380	women_GDHS_14.dta	greater accra urban	136	1941965		25-29	female		unexposed	greater accra	urban	akan	christianity	secondary/higher	15	richest	201398		no		yes	no	no	no	yes	no		8	yes, valid		yes	public/gov't	outpatient	national health insurance	no	yes	no	yes	good	very easy	satisfied	very satisfied
957	137 4 2	GH6	137	4	usual resident	1379	women_GDHS_14.dta	upper east rural	137	626580		30-34	female		unexposed	upper east	rural	mole_dagbani	christianity	none	0	poorest	-81991		no		yes	no	no	no	yes	no		yes, paid myself	yes, valid		yes	public/gov't	outpatient	national health insurance	no	yes	yes	yes	good	easy	very satisfied	very satisfied	very satisfied
958	137 5 2	GH6	137	5	usual resident	1379	women_GDHS_14.dta	upper east rural	137	626580		20-24	female		unexposed	upper east	rural	mole_dagbani	christianity	secondary/higher	6	poorest	-88954		no		yes	no	no	no	yes	no		yes, paid by a relative / friend	yes, valid		yes	public/gov't	outpatient	national health insurance	no	yes	yes	yes	good	easy
959	137 6 3	GH6	137	6	usual resident	1379	women_GDHS_14.dta	upper east rural	137	626580		20-24	female		unexposed	upper east	rural	mole_dagbani	christianity	secondary/higher	12	poorest	-158612		no		yes	no	no	no	yes	no		yes, paid by a relative / friend	yes, valid		yes	public/gov't	outpatient	national health insurance	no	yes	yes	yes	good	easy	satisfied	satisfied	satisfied
960	13712 2	GH6	137	12	usual resident	1379	women_GDHS_14.dta	upper east rural	137	626580		35-39	female		unexposed	upper east	rural	mole_dagbani	christianity	none	0	poorest	-226176		no		yes	no	no	no	yes	no		yes, paid myself	yes, valid		yes	public/gov't	outpatient	national health insurance	no	yes	yes	yes	good	easy	satisfied
961	13715 2	GH6	137	15	usual resident	1379	women_GDHS_14.dta	upper east rural	137	626580		25-29	female		unexposed	upper east	rural	mole_dagbani	islam	none	0	poorest	-180493		no		yes	no	no	no	yes	no		yes, paid by a relative / friend	yes, valid		yes	public/gov't	outpatient	national health insurance	no	yes	yes	yes	good	easy	satisfied	satisfied	satisfied
962	13727 2	GH6	137	27	usual resident	1379	women_GDHS_14.dta	upper east rural	137	626580		30-34	female		unexposed	upper east	rural	mole_dagbani	christianity	primary education	4	poorest	-75892		no		yes	no	no	no	yes	no		yes, paid myself	yes, valid		yes	public/gov't	outpatient	national health insurance	no	yes	yes	yes	good	easy	satisfied	satisfied	satisfied
963	13822 2	GH6	138	22	usual resident	1379	women_GDHS_14.dta	greater accra urban	138	2437434		25-29	female		unexposed	greater accra	urban	akan	christianity	secondary/higher	9	richer	53292		no		yes	no	no	no	yes	no		yes, paid by a relative / friend	yes, valid		yes	public/gov't	outpatient	combination of any of the above	yes	yes	yes	yes	good	very easy		satisfied	satisfied
964	139 4 2	GH6	139	4	usual resident	1377	women_GDHS_14.dta	upper west rural	139	287989		over44	female		unexposed	upper west	rural	mole_dagbani	christianity	none	0	poorest	-166773		no		yes	no	no	no	yes	no		yes, paid by a relative / friend	yes, valid		yes	public/gov't	outpatient	national health insurance	no	yes	yes	yes	good	easy	satisfied	satisfied	satisfied
965	139 8 2	GH6	139	8	usual resident	1377	women_GDHS_14.dta	upper west rural	139	287989		25-29	female		unexposed	upper west	rural	mole_dagbani	christianity	none	0	poorest	-125713		no		yes	no	no	no	yes	no		yes, paid by a relative / friend	yes, valid		yes	public/gov't	outpatient	national health insurance	no	yes	yes	yes	very good	easy	fairly satisfied	satisfied	not satisfied
966	13915 2	GH6	139	15	usual resident	1377	women_GDHS_14.dta	upper west rural	139	287989		35-39	female		unexposed	upper west	rural	mole_dagbani	christianity	none	0	poorest	-221763		no		yes	no	no	no	yes	no		yes, paid by a relative / friend	yes, valid		yes	public/gov't	outpatient	national health insurance	no	yes	yes	yes	good	easy	satisfied	satisfied	satisfied
967	13917 2	GH6	139	17	usual resident	1377	women_GDHS_14.dta	upper west rural	139	287989		30-34	female		unexposed	upper west	rural	mole_dagbani	christianity	none	0	poorest	-158210		no		yes	no	no	no	yes	no		yes, paid by a relative / friend	yes, valid		yes	public/gov't	outpatient	national health insurance	no	yes	yes	yes	good	easy	satisfied	satisfied	satisfied
968	13920 2	GH6	139	20	usual resident	1377	women_GDHS_14.dta	upper west rural	139	287989		25-29	female		unexposed	upper west	rural	mole_dagbani	christianity	none	0	poorest	-111123		no		yes	no	no	no	yes	no		yes, paid by a relative / friend	yes, valid		yes	public/gov't	outpatient	national health insurance	no	yes	yes	yes	good	easy	not satisfied	satisfied	satisfied
969	14025 3	GH6	140	25	usual resident	1379	women_GDHS_14.dta	western rural	140	1648428		15-19	female		unexposed	western	rural	akan	christianity	secondary/higher	8	middle	9513		no		yes	no	no	no	yes	no		8	yes, valid		yes	public/gov't	outpatient	national health insurance	no	yes	yes	yes	very good	easy	very satisfied	very satisfied	very satisfied
970	14029 2	GH6	140	29	usual resident	1379	women_GDHS_14.dta	western rural	140	1648428		20-24	female		unexposed	western	rural	akan	christianity	secondary/higher	8	poorer	-42977		no		yes	no	no	no	yes	no		8	yes, valid		yes	public/gov't	outpatient	national health insurance	no	yes	yes	yes	very good	very easy	very satisfied	very satisfied	very satisfied
971	14032 2	GH6	140	32	usual resident	1379	women_GDHS_14.dta	western rural	140	1648428		35-39	female		unexposed	western	rural	akan	christianity	secondary/higher	9	middle	-11572		no		yes	no	no	no	yes	no		yes, paid by a relative / friend	yes, valid		yes	public/gov't	outpatient	national health insurance	no	yes	yes	yes	very good	easy	satisfied	satisfied	satisfied
972	141 4 2	GH6	141	4	usual resident	1378	women_GDHS_14.dta	western rural	141	1788478		30-34	female		unexposed	western	rural	akan	christianity	secondary/higher	9	richer	84679		no		yes	no	no	no	yes	no		yes, paid myself	yes, valid		yes	private	outpatient	national health insurance	no	yes	yes	yes	very good	very easy	satisfied	satisfied	satisfied
973	142 6 2	GH6	142	6	usual resident	1379	women_GDHS_14.dta	upper west urban	142	105746		25-29	female		unexposed	upper west	urban	mole_dagbani	christianity	secondary/higher	15	richest	100881		no		yes	no	no	no	yes	no		yes, paid myself	yes, valid		yes	public/gov't	outpatient	national health insurance	no	yes	yes	yes	good	easy	not satisfied	satisfied	not satisfied
974	142 9 2	GH6	142	9	usual resident	1379	women_GDHS_14.dta	upper west urban	142	105746		35-39	female		unexposed	upper west	urban	mole_dagbani	christianity	primary education	6	poorest	-111406		no		yes	no	no	no	yes	no		yes, paid myself	yes, valid		yes	public/gov't	outpatient	national health insurance	no	yes	yes	yes	good	easy	fairly satisfied	satisfied	very dissatisfied
975	14210 4	GH6	142	10	usual resident	1379	women_GDHS_14.dta	upper west urban	142	105746		15-19	female		unexposed	upper west	urban	mole_dagbani	christianity	secondary/higher	8	richer	86555		no		yes	no	no	no	yes	no		yes, paid by a relative / friend	yes, valid		yes	public/gov't	outpatient	national health insurance	no	yes	yes	yes	good	easy	fairly satisfied	fairly satisfied	satisfied
976	14213 2	GH6	142	13	usual resident	1379	women_GDHS_14.dta	upper west urban	142	105746		20-24	female		unexposed	upper west	urban	mole_dagbani	christianity	secondary/higher	9	poorest	-92384		no		yes	no	no	no	yes	no		yes, paid by a relative / friend	yes, valid		yes	public/gov't	outpatient	national health insurance	no	yes	yes	yes	good	easy	satisfied	satisfied	fairly satisfied
977	14216 2	GH6	142	16	usual resident	1379	women_GDHS_14.dta	upper west urban	142	105746		25-29	female		unexposed	upper west	urban	mole_dagbani	christianity	secondary/higher	16	middle	6479		no		yes	no	no	no	yes	no		yes, paid myself	yes, valid		yes	public/gov't	outpatient	national health insurance	no	yes	yes	yes	good	difficult	fairly satisfied	satisfied	not satisfied
978	14219 5	GH6	142	19	usual resident	1379	women_GDHS_14.dta	upper west urban	142	105746		25-29	female		unexposed	upper west	urban	mole_dagbani	christianity	secondary/higher	14	poorer	-43930		no		yes	no	no	no	yes	no		yes, paid by a relative / friend	yes, valid		yes	public/gov't	outpatient	national health insurance	no	yes	yes	no	good	easy	very satisfied		satisfied
979	14223 1	GH6	142	23	usual resident	1379	women_GDHS_14.dta	upper west urban	142	105746		25-29	female		unexposed	upper west	urban	mole_dagbani	christianity	primary education	3	richer	43544		no		yes	no	no	no	yes	no		yes, paid myself	yes, valid		yes	public/gov't	outpatient	national health insurance	no	yes	yes	yes	good	easy	satisfied	satisfied	fairly satisfied
980	14226 2	GH6	142	26	usual resident	1379	women_GDHS_14.dta	upper west urban	142	105746		20-24	female		unexposed	upper west	urban	mole_dagbani	christianity	secondary/higher	9	poorer	-33529		no		yes	no	no	no	yes	no		yes, paid by a relative / friend	yes, valid		yes	public/gov't	outpatient	national health insurance	no	yes	yes	yes	good	easy	fairly satisfied	satisfied	satisfied
981	14230 2	GH6	142	30	usual resident	1379	women_GDHS_14.dta	upper west urban	142	105746		25-29	female		unexposed	upper west	urban	mole_dagbani	christianity	none	0	middle	-11577		no		yes	no	no	no	yes	no		yes, paid by a relative / friend	yes, valid		yes	public/gov't	outpatient	national health insurance	no	yes	yes	yes	good	easy	fairly satisfied	satisfied	satisfied
982	14230 8	GH6	142	30	usual resident	1379	women_GDHS_14.dta	upper west urban	142	105746		15-19	female		unexposed	upper west	urban	mole_dagbani	christianity	primary education	5	middle	-11577		no		yes	no	no	no	yes	no		yes, paid by a relative / friend	yes, valid		yes	public/gov't	outpatient	cash	yes	yes	yes	yes	good	easy	satisfied	satisfied	fairly satisfied
983	143 6 1	GH6	143	6	usual resident	1378	women_GDHS_14.dta	western rural	143	1939180		40-44	female		unexposed	western	rural	akan	christianity	none	0	richer	51890		yes		yes	no	no	no	yes	no		yes, paid by a relative / friend	yes, valid		yes	private	outpatient	cash	yes	yes	yes	yes	good	fairly easy	satisfied	satisfied	satisfied
984	143 6 2	GH6	143	6	usual resident	1378	women_GDHS_14.dta	western rural	143	1939180		25-29	female		unexposed	western	rural	akan	christianity	secondary/higher	12	richer	51890		no		yes	no	no	no	yes	no		yes, paid myself	yes, valid		yes	public/gov't	outpatient	cash	yes	yes	yes	yes	good	easy	satisfied	satisfied	satisfied
985	143 7 1	GH6	143	7	usual resident	1378	women_GDHS_14.dta	western rural	143	1939180		25-29	female		unexposed	western	rural	akan	christianity	secondary/higher	9	richer	45481		no		yes	no	no	no	yes	no		yes, paid by a relative / friend	yes, valid		yes	public/gov't	outpatient	national health insurance	no	yes	yes	yes	good	easy	satisfied	satisfied	satisfied
986	14311 1	GH6	143	11	usual resident	1378	women_GDHS_14.dta	western rural	143	1939180		over44	female		unexposed	western	rural	akan	christianity	primary education	4	richer	72224		yes		yes	no	no	no	yes	no		yes, paid myself	yes, valid		yes	public/gov't	outpatient	cash	yes	yes	yes	yes	good	easy	satisfied	satisfied	satisfied
987	14313 2	GH6	143	13	usual resident	1378	women_GDHS_14.dta	western rural	143	1939180		30-34	female		unexposed	western	rural	ewe	christianity	primary education	5	middle	15232		no		yes	no	no	no	yes	no		yes, paid myself	yes, valid		yes	public/gov't	outpatient	national health insurance	no	yes	no	yes	good	very easy	fairly satisfied	fairly satisfied	fairly satisfied
988	14322 1	GH6	143	22	usual resident	1378	women_GDHS_14.dta	western rural	143	1939180		35-39	female		unexposed	western	rural	akan	christianity	secondary/higher	9	richer	76634		no		yes	no	no	no	yes	no		yes, paid by a relative / friend	yes, valid		yes	public/gov't	outpatient	national health insurance	no	yes	yes	yes	good	easy	satisfied	satisfied	satisfied
989	144 6 1	GH6	144	6	visitor	1379	women_GDHS_14.dta	brong ahafo rural	144	654108		25-29	female		unexposed	brong ahafo	rural	akan	christianity	secondary/higher	12	poorer	-68695		no		yes	no	no	no	yes	no		yes, paid by a relative / friend	yes, valid		yes	public/gov't	outpatient	national health insurance	no	yes	yes	yes	very good	very easy	fairly satisfied	very satisfied
990	14415 2	GH6	144	15	usual resident	1379	women_GDHS_14.dta	brong ahafo rural	144	654108		30-34	female		unexposed	brong ahafo	rural	akan	islam	secondary/higher	9	poorest	-80604		no		yes	no	no	no	yes	no		yes, paid by a relative / friend	yes, valid		yes	public/gov't	outpatient	national health insurance	no	yes	yes	yes	very good	very easy	not satisfied	satisfied	satisfied
991	14425 1	GH6	144	25	usual resident	1379	women_GDHS_14.dta	brong ahafo rural	144	654108		35-39	female		unexposed	brong ahafo	rural	akan	christianity	primary education	5	poorest	-76737		no		yes	no	no	no	yes	no		yes, paid by a relative / friend	yes, valid		yes	public/gov't	outpatient	national health insurance	no	yes	yes	yes	good	very easy	fairly satisfied	satisfied	fairly satisfied
992	14429 2	GH6	144	29	usual resident	1379	women_GDHS_14.dta	brong ahafo rural	144	654108		30-34	female		unexposed	brong ahafo	rural	akan	christianity	secondary/higher	9	poorer	-30281		no		yes	no	no	no	yes	no		yes, paid by a relative / friend	yes, valid		yes	public/gov't	outpatient	combination of any of the above	yes	yes	yes	yes	very good	easy	not satisfied	not satisfied
993	14430 2	GH6	144	30	usual resident	1379	women_GDHS_14.dta	brong ahafo rural	144	654108		40-44	female		unexposed	brong ahafo	rural	other	islam	none	0	poorer	-67196		no		yes	no	no	no	yes	no		yes, paid by a relative / friend	yes, valid		yes	public/gov't	outpatient	national health insurance	no	yes	yes	yes	very good	very easy	fairly satisfied	satisfied	fairly satisfied
994	145 8 3	GH6	145	8	usual resident	1377	women_GDHS_14.dta	ashanti rural	145	1669644		20-24	female		exposed	ashanti	rural	akan	christianity	secondary/higher	7	poorest	-80152		no		yes	no	no	no	yes	no		yes, paid by a relative / friend	yes, valid		yes	public/gov't	outpatient	national health insurance	no	yes	yes	yes	very good	easy	satisfied	satisfied
995	14513 3	GH6	145	13	visitor	1377	women_GDHS_14.dta	ashanti rural	145	1669644		15-19	female		exposed	ashanti	rural	akan	christianity	primary education	6	poorer	-43448		no		yes	no	no	no	yes	no		yes, paid by a relative / friend	yes, valid		yes	public/gov't	outpatient	national health insurance	no	yes	yes	yes	good	easy	satisfied	satisfied
996	146 4 1	GH6	146	4	usual resident	1377	women_GDHS_14.dta	greater accra urban	146	1069566		over44	female		unexposed	greater accra	urban	other	christianity	secondary/higher	10	richest	111614		yes		yes	no	no	no	yes	no		yes, paid myself	yes, valid		yes	private	outpatient	national health insurance	no	yes	yes	yes	very good	very easy	very satisfied	very satisfied	very satisfied
997	14626 1	GH6	146	26	usual resident	1377	women_GDHS_14.dta	greater accra urban	146	1069566		30-34	female		unexposed	greater accra	urban	akan	christianity	primary education	5	middle	-5538		no		yes	no	no	no	yes	no		yes, paid by a relative / friend	yes, valid		yes	public/gov't	outpatient	national health insurance	no	yes	yes	yes	very good	very easy	very satisfied	satisfied	very satisfied
998	14630 1	GH6	146	30	usual resident	1377	women_GDHS_14.dta	greater accra urban	146	1069566		25-29	female		unexposed	greater accra	urban	akan	christianity	secondary/higher	9	richer	61706		no		yes	no	no	no	yes	no		yes, paid myself	yes, valid		yes	private	outpatient	cash	yes	yes	no	yes	very good	very easy	satisfied	satisfied	very satisfied
999	147 6 2	GH6	147	6	usual resident	1377	women_GDHS_14.dta	western urban	147	676656		25-29	female		unexposed	western	urban	mole_dagbani	christianity	secondary/higher	9	richer	56298		no		yes	no	no	no	yes	no		yes, paid myself	yes, valid		yes	private	outpatient	national health insurance	no	yes	yes	yes	good	very easy	satisfied	not satisfied	fairly satisfied
1000	14712 2	GH6	147	12	usual resident	1377	women_GDHS_14.dta	western urban	147	676656		35-39	female		unexposed	western	urban	mole_dagbani	christianity	none	0	middle	19237		no		yes	no	no	no	yes	no		yes, paid myself	yes, valid		yes	private	outpatient	national health insurance	no	yes	yes	yes	very good	very easy	very satisfied	very satisfied	very satisfied
1001	14727 2	GH6	147	27	usual resident	1377	women_GDHS_14.dta	western urban	147	676656		20-24	female		unexposed	western	urban	akan	christianity	secondary/higher	13	richer	64193		no		yes	no	no	no	yes	no		yes, paid by a relative / friend	yes, valid		yes	public/gov't	outpatient	cash	yes	yes	yes	yes	very good	very easy	very satisfied	not satisfied	very satisfied
1002	14729 1	GH6	147	29	usual resident	1377	women_GDHS_14.dta	western urban	147	676656		over44	female		unexposed	western	urban	akan	christianity	secondary/higher	10	richer	87149		yes		yes	no	no	no	yes	no		yes, paid myself	yes, valid		yes	private	outpatient	national health insurance	no	yes	yes	yes	very good	very easy	fairly satisfied	very satisfied	very satisfied
1003	14819 1	GH6	148	19	usual resident	1378	women_GDHS_14.dta	greater accra urban	148	2048731		35-39	female		unexposed	greater accra	urban	other	other	secondary/higher	8	richest	110730		yes		yes	no	no	no	yes	no		no, exempt as indigent	yes, valid		yes	private	outpatient	national health insurance	no	yes	yes	yes	fair	easy	satisfied	satisfied	satisfied
1004	14921 2	GH6	149	21	usual resident	1377	women_GDHS_14.dta	northern urban	149	585077		20-24	female		unexposed	northern	urban	mole_dagbani	islam	none	0	richer	80085		no		yes	no	no	no	yes	no		yes, paid by a relative / friend	yes, valid		yes	public/gov't	outpatient	national health insurance	no	yes	yes	yes	good	easy	not satisfied	fairly satisfied	satisfied
1005	14929 4	GH6	149	29	usual resident	1377	women_GDHS_14.dta	northern urban	149	585077		15-19	female		unexposed	northern	urban	other	christianity	secondary/higher	8	richest	114627		no		yes	no	no	no	yes	no		yes, paid by a relative / friend	yes, valid		yes	public/gov't	outpatient	national health insurance	no	no	yes	yes	very good	easy	fairly satisfied	fairly satisfied	satisfied
1006	14931 2	GH6	149	31	usual resident	1377	women_GDHS_14.dta	northern urban	149	585077		over44	female		unexposed	northern	urban	mole_dagbani	islam	none	0	richer	65880		no		yes	no	no	no	yes	no		yes, paid by a relative / friend	yes, valid		yes	public/gov't	outpatient	national health insurance	no	yes	no	yes	good	fairly easy	satisfied	satisfied	fairly satisfied
1007	150 2 2	GH6	150	2	usual resident	1377	women_GDHS_14.dta	brong ahafo urban	150	844847		30-34	female		unexposed	brong ahafo	urban	other	islam	secondary/higher	9	middle	3697		no		yes	no	no	no	yes	no		yes, paid by a relative / friend	yes, valid		yes	public/gov't	outpatient	national health insurance	no	yes	yes	yes	good	easy	satisfied	fairly satisfied	satisfied
1008	150 6 2	GH6	150	6	usual resident	1377	women_GDHS_14.dta	brong ahafo urban	150	844847		25-29	female		unexposed	brong ahafo	urban	akan	christianity	secondary/higher	9	richer	63815		no		yes	no	no	no	yes	no		yes, paid by a relative / friend	yes, valid		yes	private	outpatient	national health insurance	no	yes	yes	yes	very good	very easy	very satisfied	very satisfied
1009	15012 2	GH6	150	12	usual resident	1377	women_GDHS_14.dta	brong ahafo urban	150	844847		over44	female		unexposed	brong ahafo	urban	akan	christianity	primary education	2	poorer	-46097		no		yes	no	no	no	yes	no		yes, paid by a relative / friend	yes, valid		yes	public/gov't	outpatient	national health insurance	no	yes	yes	yes	fair	easy	satisfied	not satisfied	fairly satisfied
1010	15015 1	GH6	150	15	usual resident	1377	women_GDHS_14.dta	brong ahafo urban	150	844847		over44	female		unexposed	brong ahafo	urban	akan	christianity	secondary/higher	10	richer	69171		no		yes	no	no	no	yes	no		yes, paid by a relative / friend	yes, valid		yes	public/gov't	outpatient	national health insurance	no	yes	yes	yes	good	very easy	satisfied	satisfied	fairly satisfied
1011	15019 1	GH6	150	19	usual resident	1377	women_GDHS_14.dta	brong ahafo urban	150	844847		25-29	female		unexposed	brong ahafo	urban	other	christianity	secondary/higher	8	middle	20752		no		yes	no	no	no	yes	no		yes, paid by a relative / friend	yes, valid		yes	private	outpatient	national health insurance	no	yes	yes	yes	very good	very easy	very satisfied	very satisfied	very satisfied
1012	15021 2	GH6	150	21	usual resident	1377	women_GDHS_14.dta	brong ahafo urban	150	844847		25-29	female		unexposed	brong ahafo	urban	mole_dagbani	christianity	none	0	richer	42986		no		yes	no	no	no	yes	no		yes, paid by a relative / friend	yes, valid		yes	public/gov't	outpatient	national health insurance	no	yes	yes	yes	very good	very easy	very satisfied	very satisfied	satisfied
1013	151 4 1	GH6	151	4	usual resident	1377	women_GDHS_14.dta	greater accra urban	151	1592625		35-39	female		unexposed	greater accra	urban	other	islam	primary education	5	richest	173160		no		yes	no	no	no	yes	no		yes, paid myself	yes, valid		yes	private	outpatient	cash	yes	yes	yes	yes	very good	very easy	satisfied	very satisfied	very satisfied
1014	151 6 2	GH6	151	6	usual resident	1377	women_GDHS_14.dta	greater accra urban	151	1592625		20-24	female		unexposed	greater accra	urban	other	islam	none	0	richer	35137		no		yes	no	no	no	yes	no		no, exempt as indigent	yes, valid		yes	public/gov't	outpatient	national health insurance	no	yes	no	yes	good	very easy	very satisfied	satisfied	very satisfied
1015	152 2 2	GH6	152	2	usual resident	1377	women_GDHS_14.dta	central urban	152	557752		over44	female		unexposed	central	urban	akan	christianity	secondary/higher	7	richest	133144		no		yes	no	no	no	yes	no		yes, paid by a relative / friend	yes, valid		yes	public/gov't	outpatient	national health insurance	no	yes	yes	yes	very good	very easy	satisfied	satisfied	satisfied
1016	152 5 6	GH6	152	5	usual resident	1377	women_GDHS_14.dta	central urban	152	557752		15-19	female		unexposed	central	urban	akan	islam	secondary/higher	8	richer	47749		no		yes	no	no	no	yes	no		yes, paid by a relative / friend	yes, valid		yes	public/gov't	outpatient	cash	yes	no	yes	yes	good	difficult	not satisfied	not satisfied	fairly satisfied
1017	152 6 2	GH6	152	6	usual resident	1377	women_GDHS_14.dta	central urban	152	557752		30-34	female		unexposed	central	urban	akan	christianity	secondary/higher	9	richer	63863		no		yes	no	no	no	yes	no		yes, paid myself	yes, valid		yes	public/gov't	outpatient	cash	yes	yes	yes	yes	good	easy	fairly satisfied	satisfied	fairly satisfied
1018	152 8 2	GH6	152	8	usual resident	1377	women_GDHS_14.dta	central urban	152	557752		35-39	female		unexposed	central	urban	other	christianity	secondary/higher	12	richest	101019		no		yes	no	no	no	yes	no		yes, paid by a relative / friend	yes, valid		yes	public/gov't	outpatient	national health insurance	no	no	yes	yes	good	very easy	not satisfied	satisfied	satisfied
1019	15211 4	GH6	152	11	usual resident	1377	women_GDHS_14.dta	central urban	152	557752		15-19	female		unexposed	central	urban	akan	christianity	secondary/higher	12	richest	162010		no		yes	no	no	no	yes	no		yes, paid by a relative / friend	yes, valid		yes	private	outpatient	national health insurance	no	yes	yes	yes	very good	very easy	not satisfied	not satisfied	not satisfied
1020	15213 3	GH6	152	13	usual resident	1377	women_GDHS_14.dta	central urban	152	557752		15-19	female		unexposed	central	urban	akan	christianity	secondary/higher	8	middle	10044		no		yes	no	no	no	yes	no		yes, paid by a relative / friend	yes, valid		yes	private	outpatient	cash	yes	yes	yes	yes	good	very easy	very satisfied	satisfied	fairly satisfied
1021	153 9 2	GH6	153	9	usual resident	1377	women_GDHS_14.dta	upper east urban	153	184123		40-44	female		unexposed	upper east	urban	mole_dagbani	christianity	none	0	poorest	-227648		no		yes	no	no	no	yes	no		yes, paid by a relative / friend	yes, valid		yes	public/gov't	outpatient	national health insurance	no	yes	yes	yes	good	easy	fairly satisfied	not satisfied	not satisfied
1022	15311 5	GH6	153	11	usual resident	1377	women_GDHS_14.dta	upper east urban	153	184123		30-34	female		unexposed	upper east	urban	mole_dagbani	other	none	0	poorest	-191638		no		yes	no	no	no	yes	no		yes, paid myself	yes, valid		yes	public/gov't	outpatient	national health insurance	no	yes	yes	yes	very good	very easy	satisfied	satisfied	satisfied
1023	15312 2	GH6	153	12	usual resident	1377	women_GDHS_14.dta	upper east urban	153	184123		35-39	female		unexposed	upper east	urban	mole_dagbani	christianity	none	0	poorest	-333304		yes		yes	no	no	no	yes	no		yes, paid myself	yes, valid		yes	public/gov't	outpatient	national health insurance	no	yes	yes	yes	good	very easy	satisfied	satisfied	satisfied
1024	15317 3	GH6	153	17	usual resident	1377	women_GDHS_14.dta	upper east urban	153	184123		15-19	female		unexposed	upper east	urban	mole_dagbani	christianity	secondary/higher	8	poorest	-260926		no		yes	no	no	no	yes	no		yes, paid by a relative / friend	yes, valid		yes	public/gov't	outpatient	national health insurance	no	yes	yes	yes	good	easy	very dissatisfied	satisfied	satisfied
1025	15318 2	GH6	153	18	usual resident	1377	women_GDHS_14.dta	upper east urban	153	184123		40-44	female		unexposed	upper east	urban	mole_dagbani	christianity	none	0	poorest	-263225		no		yes	no	no	no	yes	no		yes, paid by a relative / friend	yes, valid		yes	public/gov't	outpatient	national health insurance	no	yes	yes	yes	good	very easy	satisfied	satisfied	satisfied
1026	15320 4	GH6	153	20	usual resident	1377	women_GDHS_14.dta	upper east urban	153	184123		20-24	female		unexposed	upper east	urban	mole_dagbani	christianity	secondary/higher	9	poorest	-216055		no		yes	no	no	no	yes	no		yes, paid by a relative / friend	yes, valid		yes	public/gov't	outpatient	national health insurance	no	yes	yes	yes	good	easy	satisfied	satisfied	satisfied
1027	15324 2	GH6	153	24	usual resident	1377	women_GDHS_14.dta	upper east urban	153	184123		20-24	female		unexposed	upper east	urban	mole_dagbani	christianity	secondary/higher	9	poorer	-29383		no		yes	no	no	no	yes	no		no, exempt as indigent	yes, valid		yes	public/gov't	outpatient	national health insurance	no	yes	yes	yes	good	easy	fairly satisfied	very satisfied
1028	15329 1	GH6	153	29	usual resident	1377	women_GDHS_14.dta	upper east urban	153	184123		40-44	female		unexposed	upper east	urban	mole_dagbani	christianity	primary education	6	poorer	-27635		yes		yes	no	no	no	yes	no		yes, paid myself	yes, valid		yes	public/gov't	outpatient	national health insurance	no	yes	yes	yes	good	easy	satisfied	very satisfied	very satisfied
1029	15329 3	GH6	153	29	usual resident	1377	women_GDHS_14.dta	upper east urban	153	184123		15-19	female		unexposed	upper east	urban	mole_dagbani	christianity	secondary/higher	10	poorer	-27635		no		yes	no	no	no	yes	no		yes, paid by a relative / friend	yes, valid		yes	public/gov't	outpatient	national health insurance	no	yes	yes	yes	very good	difficult	satisfied	satisfied	very dissatisfied
1030	15331 2	GH6	153	31	usual resident	1377	women_GDHS_14.dta	upper east urban	153	184123		30-34	female		unexposed	upper east	urban	mole_dagbani	christianity	primary education	4	poorest	-201111		no		yes	no	no	no	yes	no		yes, paid by a relative / friend	yes, valid		yes	public/gov't	outpatient	national health insurance	no	yes	yes	yes	good	easy	satisfied	satisfied	satisfied
1031	15412 1	GH6	154	12	usual resident	1380	women_GDHS_14.dta	brong ahafo urban	154	929119		25-29	female		unexposed	brong ahafo	urban	akan	christianity	primary education	4	richer	58215		no		yes	no	no	no	yes	no		yes, paid by a relative / friend	yes, valid		yes	public/gov't	outpatient	national health insurance	no	yes	yes	yes	very good	easy	fairly satisfied	satisfied	satisfied
1032	15427 2	GH6	154	27	usual resident	1380	women_GDHS_14.dta	brong ahafo urban	154	929119		25-29	female		unexposed	brong ahafo	urban	other	christianity	secondary/higher	14	richest	103286		no		yes	no	no	no	yes	no		yes, paid myself	yes, valid		yes	public/gov't	outpatient	combination of any of the above	yes	yes	yes	yes	very good	very easy	very satisfied	very satisfied	very satisfied
1033	15433 2	GH6	154	33	usual resident	1380	women_GDHS_14.dta	brong ahafo urban	154	929119		30-34	female		unexposed	brong ahafo	urban	akan	christianity	primary education	6	middle	31074		no		yes	no	no	no	yes	no		yes, paid by a relative / friend	yes, valid		yes	public/gov't	outpatient	national health insurance	no	yes	yes	yes	very good	very easy	very satisfied	very satisfied	very satisfied
1034	15526 2	GH6	155	26	usual resident	1379	women_GDHS_14.dta	ashanti rural	155	1601622		15-19	female		exposed	ashanti	rural	akan	christianity	secondary/higher	10	poorer	-31508		no		yes	no	no	no	yes	no		yes, paid by a relative / friend	yes, valid		yes	private	outpatient	national health insurance	no	no	no	yes	very good	very easy	satisfied	satisfied	satisfied
1035	157 6 1	GH6	157	6	usual resident	1378	women_GDHS_14.dta	brong ahafo rural	157	648565		25-29	female		unexposed	brong ahafo	rural	akan	christianity	secondary/higher	14	middle	9018		no		yes	no	no	no	yes	no		yes, paid by a relative / friend	yes, valid		yes	public/gov't	outpatient	national health insurance	no	yes	yes	yes	very good	easy	not satisfied	satisfied	satisfied
1036	157 7 2	GH6	157	7	usual resident	1378	women_GDHS_14.dta	brong ahafo rural	157	648565		35-39	female		unexposed	brong ahafo	rural	other	christianity	none	0	poorest	-128511		no		yes	no	no	no	yes	no		yes, paid by a relative / friend	yes, valid		yes	public/gov't	outpatient	national health insurance	no	yes	no	yes	good	very easy	satisfied	satisfied
1037	15713 2	GH6	157	13	usual resident	1378	women_GDHS_14.dta	brong ahafo rural	157	648565		35-39	female		unexposed	brong ahafo	rural	akan	christianity	secondary/higher	9	poorest	-105053		no		yes	no	no	no	yes	no		8	yes, valid		yes	private	outpatient	national health insurance	no	yes	yes	yes	very good	very easy	satisfied	satisfied	satisfied
1038	15716 2	GH6	157	16	usual resident	1378	women_GDHS_14.dta	brong ahafo rural	157	648565		35-39	female		unexposed	brong ahafo	rural	other	christianity	none	0	poorest	-95238		no		yes	no	no	no	yes	no		yes, paid myself	yes, valid		yes	public/gov't	outpatient	national health insurance	no	yes	yes	yes	very good	very easy	satisfied	satisfied	satisfied
1039	15719 2	GH6	157	19	usual resident	1378	women_GDHS_14.dta	brong ahafo rural	157	648565		25-29	female		unexposed	brong ahafo	rural	other	christianity	secondary/higher	8	poorer	-52067		no		yes	no	no	no	yes	no		8	yes, valid		yes	public/gov't	outpatient	national health insurance	no	yes	yes	yes	good	very easy	satisfied	satisfied
1040	15720 2	GH6	157	20	usual resident	1378	women_GDHS_14.dta	brong ahafo rural	157	648565		15-19	female		unexposed	brong ahafo	rural	akan	christianity	secondary/higher	8	poorest	-105560		no		yes	no	no	no	yes	no		yes, paid by a relative / friend	yes, valid		yes	public/gov't	outpatient	national health insurance	no	yes	yes	yes	good	very easy	satisfied	satisfied	satisfied
1041	15729 2	GH6	157	29	usual resident	1378	women_GDHS_14.dta	brong ahafo rural	157	648565		35-39	female		unexposed	brong ahafo	rural	akan	christianity	primary education	6	poorest	-108144		no		yes	no	no	no	yes	no		yes, paid myself	yes, valid		yes	public/gov't	outpatient	national health insurance	no	yes	yes	yes	very poor	very easy	not satisfied	very satisfied	satisfied
1042	15733 2	GH6	157	33	usual resident	1378	women_GDHS_14.dta	brong ahafo rural	157	648565		40-44	female		unexposed	brong ahafo	rural	other	christianity	none	0	poorer	-62649		no		yes	no	no	no	yes	no		yes, paid myself	yes, valid		yes	public/gov't	outpatient	national health insurance	no	yes	no	yes	very good	easy	very satisfied	very satisfied
1043	15733 3	GH6	157	33	usual resident	1378	women_GDHS_14.dta	brong ahafo rural	157	648565		15-19	female		unexposed	brong ahafo	rural	other	christianity	secondary/higher	8	poorer	-62649		no		yes	no	no	no	yes	no		yes, paid by a relative / friend	yes, valid		yes	public/gov't	outpatient	national health insurance	no	yes	no	yes	good	difficult	not satisfied	fairly satisfied	fairly satisfied
1044	158 4 1	GH6	158	4	usual resident	1378	women_GDHS_14.dta	central urban	158	646330		40-44	female		unexposed	central	urban	akan	other	secondary/higher	10	richest	140829		yes		yes	no	no	no	yes	no		yes, paid myself	yes, valid		yes	public/gov't	outpatient	national health insurance	no	yes	yes	yes	very good	very easy	satisfied	satisfied	satisfied
1045	15821 2	GH6	158	21	usual resident	1378	women_GDHS_14.dta	central urban	158	646330		35-39	female		unexposed	central	urban	akan	christianity	secondary/higher	12	richest	229325		no		yes	no	no	no	yes	no		yes, paid myself	yes, valid		yes	private	outpatient	cash	yes	yes	yes	yes	very good	very easy	satisfied	satisfied	satisfied
1046	15828 1	GH6	158	28	usual resident	1378	women_GDHS_14.dta	central urban	158	646330		20-24	female		unexposed	central	urban	akan	christianity	secondary/higher	13	richest	153073		no		yes	no	no	no	yes	no		yes, paid by a relative / friend	yes, valid		yes	public/gov't	outpatient	national health insurance	no	yes	yes	yes	very good	very easy	satisfied	satisfied	very satisfied
1047	15832 1	GH6	158	32	usual resident	1379	women_GDHS_14.dta	central urban	158	646330		25-29	female		unexposed	central	urban	akan	christianity	secondary/higher	15	richest	138185		no		yes	no	no	no	yes	no		yes, paid myself	yes, valid		yes	public/gov't	outpatient	national health insurance	no	yes	yes	yes	very good	very easy	very satisfied	very satisfied	satisfied
1048	15910 2	GH6	159	10	usual resident	1379	women_GDHS_14.dta	eastern urban	159	844489		15-19	female		unexposed	eastern	urban	akan	christianity	secondary/higher	7	richer	48966		no		yes	no	no	no	yes	no		8	yes, valid		yes	public/gov't	outpatient	national health insurance	no	yes	yes	yes	good	very easy	satisfied	satisfied	satisfied
1049	15923 1	GH6	159	23	usual resident	1379	women_GDHS_14.dta	eastern urban	159	844489		40-44	female		unexposed	eastern	urban	akan	christianity	secondary/higher	10	middle	18294		no		yes	no	no	no	yes	no		yes, paid myself	yes, valid		yes	public/gov't	outpatient	combination of any of the above	yes	no	yes	no	good	easy	not satisfied	satisfied	very dissatisfied
1050	15931 2	GH6	159	31	usual resident	1379	women_GDHS_14.dta	eastern urban	159	844489		30-34	female		unexposed	eastern	urban	akan	christianity	secondary/higher	9	middle	11477		no		yes	no	no	no	yes	no		yes, paid myself	yes, valid		yes	public/gov't	outpatient	national health insurance	no	yes	yes	yes	good	very easy	satisfied	satisfied	satisfied
1051	161 1 2	GH6	161	1	usual resident	1378	women_GDHS_14.dta	upper east rural	161	500663		35-39	female		unexposed	upper east	rural	other	christianity	primary education	6	poorest	-130673		no		yes	no	no	no	yes	no		yes, paid myself	yes, valid		yes	public/gov't	outpatient	national health insurance	no	yes	yes	yes	very good	difficult	not satisfied	satisfied	not satisfied
1052	161 3 5	GH6	161	3	usual resident	1378	women_GDHS_14.dta	upper east rural	161	500663		15-19	female		unexposed	upper east	rural	other	christianity	secondary/higher	8	poorest	-173082		no		yes	no	no	no	yes	no		yes, paid by a relative / friend	yes, valid		yes	public/gov't	outpatient	national health insurance	no	yes	yes	yes	very good	very easy	satisfied	very satisfied	not satisfied
1053	161 6 2	GH6	161	6	usual resident	1378	women_GDHS_14.dta	upper east rural	161	500663		25-29	female		unexposed	upper east	rural	other	christianity	secondary/higher	8	poorest	-173795		no		yes	no	no	no	yes	no		yes, paid myself	yes, valid		yes	public/gov't	outpatient	national health insurance	no	yes	yes	yes	good	easy	fairly satisfied	very satisfied	fairly satisfied
1054	161 7 1	GH6	161	7	usual resident	1378	women_GDHS_14.dta	upper east rural	161	500663		35-39	female		unexposed	upper east	rural	other	christianity	none	0	poorest	-144082		no		yes	no	no	no	yes	no		yes, paid myself	yes, valid		yes	public/gov't	outpatient	national health insurance	no	yes	yes	yes	very good	very easy	satisfied	satisfied	satisfied
1055	161 7 2	GH6	161	7	usual resident	1378	women_GDHS_14.dta	upper east rural	161	500663		15-19	female		unexposed	upper east	rural	other	christianity	secondary/higher	9	poorest	-144082		no		yes	no	no	no	yes	no		yes, paid by a relative / friend	yes, valid		yes	public/gov't	outpatient	national health insurance	no	yes	yes	yes	good	easy	satisfied	satisfied	satisfied
1056	161 7 3	GH6	161	7	usual resident	1378	women_GDHS_14.dta	upper east rural	161	500663		15-19	female		unexposed	upper east	rural	other	christianity	secondary/higher	7	poorest	-144082		no		yes	no	no	no	yes	no		yes, paid by a relative / friend	yes, valid		yes	public/gov't	outpatient	national health insurance	no	yes	yes	yes	very good	very easy	satisfied	satisfied	satisfied
1057	161 8 2	GH6	161	8	usual resident	1378	women_GDHS_14.dta	upper east rural	161	500663		35-39	female		unexposed	upper east	rural	other	christianity	none	0	poorest	-135622		no		yes	no	no	no	yes	no		yes, paid by a relative / friend	yes, valid		yes	public/gov't	outpatient	national health insurance	no	yes	yes	yes	good	easy	very satisfied	very satisfied
1058	16111 2	GH6	161	11	usual resident	1378	women_GDHS_14.dta	upper east rural	161	500663		20-24	female		unexposed	upper east	rural	mole_dagbani	christianity	primary education	4	poorest	-139019		no		yes	no	no	no	yes	no		yes, paid myself	yes, valid		yes	public/gov't	outpatient	national health insurance	no	yes	yes	yes	very good	very easy	satisfied	satisfied	satisfied
1059	16115 2	GH6	161	15	usual resident	1378	women_GDHS_14.dta	upper east rural	161	500663		over44	female		unexposed	upper east	rural	other	other	none	0	poorest	-224842		no		yes	no	no	no	yes	no		yes, paid by a relative / friend	yes, valid		yes	public/gov't	outpatient	national health insurance	no	yes	yes	yes	very good	very easy	satisfied	satisfied	satisfied
1060	16123 2	GH6	161	23	usual resident	1378	women_GDHS_14.dta	upper east rural	161	500663		30-34	female		unexposed	upper east	rural	other	christianity	secondary/higher	8	poorest	-148550		no		yes	no	no	no	yes	no		yes, paid by a relative / friend	yes, valid		yes	public/gov't	outpatient	national health insurance	no	yes	yes	yes	good	very easy	satisfied	satisfied	satisfied
1061	16124 2	GH6	161	24	usual resident	1378	women_GDHS_14.dta	upper east rural	161	500663		over44	female		unexposed	upper east	rural	other	christianity	none	0	poorest	-148607		no		yes	no	no	no	yes	no		yes, paid myself	yes, valid		yes	public/gov't	outpatient	national health insurance	no	yes	yes	yes	very good	very easy	satisfied	satisfied	very satisfied
1062	16124 4	GH6	161	24	usual resident	1378	women_GDHS_14.dta	upper east rural	161	500663		15-19	female		unexposed	upper east	rural	other	other	secondary/higher	7	poorest	-148607		no		yes	no	no	no	yes	no		yes, paid by a relative / friend	yes, valid		yes	private	outpatient	national health insurance	no	yes	yes	yes	very good	very easy	fairly satisfied	satisfied	satisfied
1063	16126 2	GH6	161	26	usual resident	1378	women_GDHS_14.dta	upper east rural	161	500663		over44	female		unexposed	upper east	rural	other	christianity	secondary/higher	9	poorest	-172951		no		yes	no	no	no	yes	no		yes, paid by a relative / friend	yes, valid		yes	public/gov't	outpatient	national health insurance	no	yes	yes	yes	good	fairly easy	not satisfied	satisfied	fairly satisfied
1064	16129 2	GH6	161	29	usual resident	1378	women_GDHS_14.dta	upper east rural	161	500663		30-34	female		unexposed	upper east	rural	other	christianity	primary education	3	poorest	-236818		no		yes	no	no	no	yes	no		yes, paid by a relative / friend	yes, valid		yes	public/gov't	outpatient	national health insurance	no	yes	yes	yes	very good	very easy	satisfied	satisfied	satisfied
1065	162 8 2	GH6	162	8	usual resident	1377	women_GDHS_14.dta	ashanti urban	162	2576346		30-34	female		exposed	ashanti	urban	other	islam	secondary/higher	9	richest	120368		no		yes	no	no	no	yes	no		yes, paid by a relative / friend	yes, valid		yes	public/gov't	outpatient	national health insurance	no	yes	yes	yes	very good	very easy	very satisfied	very satisfied	very satisfied
1066	16221 1	GH6	162	21	usual resident	1377	women_GDHS_14.dta	ashanti urban	162	2576346		over44	female		exposed	ashanti	urban	akan	christianity	secondary/higher	8	richer	49410		yes		yes	no	no	no	yes	no		yes, paid myself	yes, valid		yes	private	outpatient	combination of any of the above	yes	yes	yes	yes	very good	very easy	very satisfied	very satisfied	very satisfied
1067	16227 2	GH6	162	27	usual resident	1377	women_GDHS_14.dta	ashanti urban	162	2576346		30-34	female		exposed	ashanti	urban	mole_dagbani	christianity	none	0	richer	50048		no		yes	no	no	no	yes	no		yes, paid by a relative / friend	yes, valid		yes	public/gov't	outpatient	combination of any of the above	yes	no	yes	yes	fair	easy	fairly satisfied	fairly satisfied	fairly satisfied
1068	163 8 2	GH6	163	8	usual resident	1380	women_GDHS_14.dta	brong ahafo urban	163	605690		35-39	female		unexposed	brong ahafo	urban	mole_dagbani	christianity	none	0	poorer	-50520		yes		yes	no	no	no	yes	no		yes, paid by a relative / friend	yes, valid		yes	public/gov't	outpatient	national health insurance	no	yes	yes	yes	very good	easy	very satisfied	very satisfied
1069	16315 2	GH6	163	15	usual resident	1380	women_GDHS_14.dta	brong ahafo urban	163	605690		35-39	female		unexposed	brong ahafo	urban	mole_dagbani	islam	none	0	middle	-10906		no		yes	no	no	no	yes	no		yes, paid by a relative / friend	yes, valid		yes	public/gov't	outpatient	national health insurance	no	yes	yes	yes	very good	very easy	very satisfied	very satisfied
1070	16315 4	GH6	163	15	usual resident	1380	women_GDHS_14.dta	brong ahafo urban	163	605690		15-19	female		unexposed	brong ahafo	urban	mole_dagbani	islam	secondary/higher	6	middle	-10906		no		yes	no	no	no	yes	no		8	yes, valid		yes	public/gov't	outpatient	national health insurance	no	yes	yes	yes	very good	very easy	satisfied	satisfied	satisfied
1071	16315 10	GH6	163	15	usual resident	1380	women_GDHS_14.dta	brong ahafo urban	163	605690		15-19	female		unexposed	brong ahafo	urban	other	islam	secondary/higher	9	middle	-10906		no		yes	no	no	no	yes	no		yes, paid by a relative / friend	yes, valid		yes	public/gov't	outpatient	national health insurance	no	yes	yes	yes	good	easy	satisfied	fairly satisfied	fairly satisfied
1072	16325 2	GH6	163	25	usual resident	1380	women_GDHS_14.dta	brong ahafo urban	163	605690		40-44	female		unexposed	brong ahafo	urban	mole_dagbani	christianity	secondary/higher	9	poorest	-78222		no		yes	no	no	no	yes	no		yes, paid by a relative / friend	yes, valid		yes	public/gov't	outpatient	national health insurance	no	yes	yes	yes	good	very easy	very satisfied	satisfied	satisfied
1073	16413 2	GH6	164	13	usual resident	1379	women_GDHS_14.dta	northern urban	164	682590		30-34	female		unexposed	northern	urban	mole_dagbani	islam	none	0	middle	-877		no		yes	no	no	no	yes	no		yes, paid by a relative / friend	yes, valid		yes	public/gov't	outpatient	national health insurance	no	yes	no	yes	good	fairly easy	fairly satisfied	satisfied
1074	16418 2	GH6	164	18	usual resident	1380	women_GDHS_14.dta	northern urban	164	682590		over44	female		unexposed	northern	urban	other	islam	secondary/higher	10	richer	64308		yes		yes	no	no	no	yes	no		yes, paid by a relative / friend	yes, valid		yes	public/gov't	outpatient	national health insurance	no	yes	yes	yes	good	easy	satisfied	very satisfied
1075	16423 2	GH6	164	23	usual resident	1379	women_GDHS_14.dta	northern urban	164	682590		30-34	female		unexposed	northern	urban	mole_dagbani	islam	secondary/higher	12	middle	30175		no		yes	no	no	no	yes	no		yes, paid by a relative / friend	yes, valid		yes	public/gov't	outpatient	national health insurance	no	yes	yes	yes	good	easy	not satisfied	not satisfied	fairly satisfied
1076	16425 4	GH6	164	25	usual resident	1380	women_GDHS_14.dta	northern urban	164	682590		20-24	female		unexposed	northern	urban	mole_dagbani	islam	secondary/higher	13	middle	32765		no		yes	no	no	no	yes	no		yes, paid by a relative / friend	yes, valid		yes	private	outpatient	national health insurance	no	yes	no	yes	very good	easy	not satisfied	fairly satisfied	satisfied
1077	16426 2	GH6	164	26	usual resident	1380	women_GDHS_14.dta	northern urban	164	682590		25-29	female		unexposed	northern	urban	mole_dagbani	islam	none	0	richer	66639		no		yes	no	no	no	yes	no		yes, paid by a relative / friend	yes, valid		yes	public/gov't	outpatient	national health insurance	no	no	no	yes	good	fairly easy	satisfied	satisfied
1078	16427 4	GH6	164	27	usual resident	1380	women_GDHS_14.dta	northern urban	164	682590		40-44	female		unexposed	northern	urban	mole_dagbani	islam	none	0	middle	32434		no		yes	no	no	no	yes	no		yes, paid by a relative / friend	yes, valid		yes	public/gov't	outpatient	national health insurance	no	yes	yes	yes	good	easy	fairly satisfied	very satisfied	fairly satisfied
1079	16429 1	GH6	164	29	usual resident	1380	women_GDHS_14.dta	northern urban	164	682590		35-39	female		unexposed	northern	urban	mole_dagbani	islam	none	0	richest	95362		no		yes	no	no	no	yes	no		yes, paid myself	yes, valid		yes	private	outpatient	cash	yes	yes	yes	yes	good	easy	satisfied	satisfied	satisfied
1080	16431 1	GH6	164	31	usual resident	1380	women_GDHS_14.dta	northern urban	164	682590		35-39	female		unexposed	northern	urban	mole_dagbani	christianity	none	0	middle	14323		no		yes	no	no	no	yes	no		yes, paid myself	yes, valid		yes	public/gov't	outpatient	national health insurance	no	no	yes	yes	good	easy	not satisfied	satisfied	satisfied
1081	16432 2	GH6	164	32	usual resident	1379	women_GDHS_14.dta	northern urban	164	682590		40-44	female		unexposed	northern	urban	mole_dagbani	islam	none	0	richer	49281		no		yes	no	no	no	yes	no		yes, paid by a relative / friend	yes, valid		yes	public/gov't	outpatient	national health insurance	no	yes	yes	yes	good	easy	very satisfied	very satisfied
1082	16512 2	GH6	165	12	usual resident	1378	women_GDHS_14.dta	ashanti rural	165	1372819		20-24	female		exposed	ashanti	rural	other	christianity	primary education	3	poorest	-94445		no		yes	no	no	no	yes	no		yes, paid by a relative / friend	yes, valid		yes	public/gov't	outpatient	national health insurance	no	yes	yes	yes	very good	very easy	very satisfied	very satisfied
1083	16517 2	GH6	165	17	usual resident	1378	women_GDHS_14.dta	ashanti rural	165	1372819		30-34	female		exposed	ashanti	rural	other	islam	primary education	1	poorest	-80692		no		yes	no	no	no	yes	no		yes, paid myself	yes, valid		yes	public/gov't	outpatient	national health insurance	no	yes	yes	yes	good	very easy	satisfied	fairly satisfied	satisfied
1084	16523 3	GH6	165	23	usual resident	1378	women_GDHS_14.dta	ashanti rural	165	1372819		15-19	female		exposed	ashanti	rural	other	christianity	secondary/higher	9	poorest	-80443		no		yes	no	no	no	yes	no		yes, paid by a relative / friend	yes, valid		yes	public/gov't	outpatient	national health insurance	no	yes	yes	yes	good	easy	fairly satisfied	satisfied
1085	16610 2	GH6	166	10	usual resident	1377	women_GDHS_14.dta	central rural	166	470078		20-24	female		unexposed	central	rural	akan	christianity	primary education	3	poorest	-76384		no		yes	no	no	no	yes	no		yes, paid myself	yes, valid		yes	public/gov't	outpatient	national health insurance	no	yes	yes	yes	good	easy	satisfied	satisfied	satisfied
1086	16613 2	GH6	166	13	usual resident	1377	women_GDHS_14.dta	central rural	166	470078		30-34	female		unexposed	central	rural	akan	christianity	primary education	3	poorer	-71205		no		yes	no	no	no	yes	no		yes, paid myself	yes, valid		yes	public/gov't	outpatient	combination of any of the above	yes	yes	yes	yes	very good	easy	satisfied	satisfied	very satisfied
1087	16632 2	GH6	166	32	usual resident	1377	women_GDHS_14.dta	central rural	166	470078		20-24	female		unexposed	central	rural	akan	christianity	secondary/higher	9	poorer	-50489		no		yes	no	no	no	yes	no		yes, paid by a relative / friend	yes, valid		yes	public/gov't	outpatient	national health insurance	no	yes	yes	yes	very good	very easy	satisfied	satisfied	satisfied
1088	167 1 2	GH6	167	1	usual resident	1380	women_GDHS_14.dta	greater accra urban	167	1557477		35-39	female		unexposed	greater accra	urban	ewe	christianity	secondary/higher	12	richest	113281		no		yes	no	no	no	yes	no		yes, paid myself	yes, valid		yes	public/gov't	outpatient	national health insurance	no	yes	yes	yes	very good	very easy	very satisfied	very satisfied	very satisfied
1089	167 4 2	GH6	167	4	usual resident	1380	women_GDHS_14.dta	greater accra urban	167	1557477		35-39	female		unexposed	greater accra	urban	akan	other	secondary/higher	9	richer	52728		yes		yes	no	no	no	yes	no		8	yes, valid		yes	private	outpatient	national health insurance	no	yes	no	yes	good	fairly easy	satisfied	satisfied	satisfied
1090	167 7 1	GH6	167	7	usual resident	1380	women_GDHS_14.dta	greater accra urban	167	1557477		35-39	female		unexposed	greater accra	urban	akan	christianity	secondary/higher	8	middle	28786		no		yes	no	no	no	yes	no		yes, paid by a relative / friend	yes, valid		yes	public/gov't	outpatient	national health insurance	no	yes	no	yes	fair	easy	very satisfied	very satisfied	very satisfied
1091	167 8 2	GH6	167	8	usual resident	1380	women_GDHS_14.dta	greater accra urban	167	1557477		35-39	female		unexposed	greater accra	urban	akan	christianity	secondary/higher	9	middle	23528		no		yes	no	no	no	yes	no		yes, paid myself	yes, valid		yes	public/gov't	outpatient	national health insurance	no	yes	yes	yes	very good	very easy	satisfied	very satisfied	satisfied
1092	16715 2	GH6	167	15	usual resident	1380	women_GDHS_14.dta	greater accra urban	167	1557477		30-34	female		unexposed	greater accra	urban	akan	christianity	secondary/higher	9	richest	132277		yes		yes	no	no	no	yes	no		yes, paid by a relative / friend	yes, valid		yes	private	outpatient	national health insurance	no	yes	yes	yes	very good	fairly easy	fairly satisfied	very satisfied
1093	16727 2	GH6	167	27	usual resident	1380	women_GDHS_14.dta	greater accra urban	167	1557477		35-39	female		unexposed	greater accra	urban	ewe	other	secondary/higher	7	richer	74630		yes		yes	no	no	no	yes	no		yes, paid by a relative / friend	yes, valid		yes	private	outpatient	combination of any of the above	yes	yes	yes	yes	very good	easy	fairly satisfied	satisfied	satisfied
1094	16731 2	GH6	167	31	usual resident	1380	women_GDHS_14.dta	greater accra urban	167	1557477		35-39	female		unexposed	greater accra	urban	akan	christianity	primary education	4	middle	-21397		no		yes	no	no	no	yes	no		no, exempt as indigent	yes, valid		yes	public/gov't	outpatient	national health insurance	no	yes	yes	yes	very good	very easy	very satisfied	very satisfied	very satisfied
1095	16814 2	GH6	168	14	usual resident	1377	women_GDHS_14.dta	western urban	168	1016839		25-29	female		unexposed	western	urban	akan	christianity	secondary/higher	9	richer	91552		no		yes	no	no	no	yes	no		yes, paid by a relative / friend	yes, valid		yes	public/gov't	outpatient	national health insurance	no	yes	yes	yes	good	easy	fairly satisfied	fairly satisfied	satisfied
1096	16826 2	GH6	168	26	usual resident	1377	women_GDHS_14.dta	western urban	168	1016839		40-44	female		unexposed	western	urban	akan	christianity	secondary/higher	8	richest	152384		yes		yes	no	no	no	yes	no		yes, paid myself	yes, valid		yes	private	outpatient	cash	yes	no	yes	yes	good	easy	satisfied	satisfied	satisfied
1097	16826 4	GH6	168	26	usual resident	1377	women_GDHS_14.dta	western urban	168	1016839		20-24	female		unexposed	western	urban	akan	christianity	secondary/higher	14	richest	152384		no		yes	no	no	no	yes	no		yes, paid by a relative / friend	yes, valid		yes	public/gov't	outpatient	cash	yes	yes	no	no	good	easy	not satisfied	satisfied	fairly satisfied
1098	169 1 2	GH6	169	1	usual resident	1378	women_GDHS_14.dta	upper east urban	169	285094		30-34	female		unexposed	upper east	urban	other	christianity	none	0	poorest	-146936		no		yes	no	no	no	yes	no		yes, paid by a relative / friend	yes, valid		yes	public/gov't	outpatient	national health insurance	no	yes	yes	yes	very good	very easy	satisfied	very satisfied	very satisfied
1099	169 4 1	GH6	169	4	usual resident	1378	women_GDHS_14.dta	upper east urban	169	285094		25-29	female		unexposed	upper east	urban	other	christianity	secondary/higher	12	richer	78105		no		yes	no	no	no	yes	no		yes, paid myself	yes, valid		yes	public/gov't	outpatient	national health insurance	no	yes	yes	yes	very good	very easy	satisfied	satisfied	satisfied
1100	16913 2	GH6	169	13	usual resident	1378	women_GDHS_14.dta	upper east urban	169	285094		over44	female		unexposed	upper east	urban	other	christianity	none	0	poorer	-63023		no		yes	no	no	no	yes	no		yes, paid by a relative / friend	yes, valid		yes	public/gov't	outpatient	national health insurance	no	yes	yes	yes	very good	very easy	satisfied	very satisfied	satisfied
1101	16913 4	GH6	169	13	usual resident	1378	women_GDHS_14.dta	upper east urban	169	285094		40-44	female		unexposed	upper east	urban	other	christianity	none	0	poorer	-63023		no		yes	no	no	no	yes	no		yes, paid by a relative / friend	yes, valid		yes	public/gov't	outpatient	national health insurance	no	yes	yes	yes	very good	very easy	satisfied	very satisfied	satisfied
1102	16915 2	GH6	169	15	usual resident	1378	women_GDHS_14.dta	upper east urban	169	285094		15-19	female		unexposed	upper east	urban	other	islam	secondary/higher	11	richer	82811		no		yes	no	no	no	yes	no		yes, paid by a relative / friend	yes, valid		yes	public/gov't	outpatient	national health insurance	no	yes	yes	yes	very good	very easy	very satisfied	satisfied	very satisfied
1103	16919 1	GH6	169	19	usual resident	1378	women_GDHS_14.dta	upper east urban	169	285094		25-29	female		unexposed	upper east	urban	other	christianity	secondary/higher	9	richer	63506		no		yes	no	no	no	yes	no		yes, paid myself	yes, valid		yes	public/gov't	outpatient	national health insurance	no	yes	yes	yes	poor	fairly easy	very dissatisfied	satisfied	satisfied
1104	16927 2	GH6	169	27	usual resident	1378	women_GDHS_14.dta	upper east urban	169	285094		30-34	female		unexposed	upper east	urban	other	christianity	secondary/higher	9	poorest	-118106		no		yes	no	no	no	yes	no		yes, paid by a relative / friend	yes, valid		yes	public/gov't	outpatient	national health insurance	no	yes	yes	yes	very good	very easy	not satisfied	very satisfied	satisfied
1105	16928 2	GH6	169	28	usual resident	1378	women_GDHS_14.dta	upper east urban	169	285094		35-39	female		unexposed	upper east	urban	other	christianity	none	0	poorer	-45430		no		yes	no	no	no	yes	no		yes, paid myself	yes, valid		yes	public/gov't	outpatient	national health insurance	no	yes	yes	yes	very good	easy	fairly satisfied	fairly satisfied	fairly satisfied
1106	16931 4	GH6	169	31	usual resident	1378	women_GDHS_14.dta	upper east urban	169	285094		35-39	female		unexposed	upper east	urban	other	christianity	none	0	poorest	-123839		no		yes	no	no	no	yes	no		yes, paid by a relative / friend	yes, valid		yes	public/gov't	outpatient	national health insurance	no	yes	yes	yes	very good	very easy	satisfied	satisfied	satisfied
1107	16931 6	GH6	169	31	usual resident	1378	women_GDHS_14.dta	upper east urban	169	285094		35-39	female		unexposed	upper east	urban	mole_dagbani	christianity	none	0	poorest	-123839		no		yes	no	no	no	yes	no		yes, paid myself	yes, valid		yes	public/gov't	outpatient	national health insurance	no	yes	yes	yes	very good	very easy	satisfied	satisfied	satisfied
1108	170 4 2	GH6	170	4	usual resident	1378	women_GDHS_14.dta	upper east rural	170	444298		40-44	female		unexposed	upper east	rural	mole_dagbani	islam	secondary/higher	9	poorest	-188408		no		yes	no	no	no	yes	no		yes, paid by a relative / friend	yes, valid		yes	public/gov't	outpatient	national health insurance	no	yes	yes	yes	very good	easy	satisfied	satisfied	satisfied
1109	170 5 2	GH6	170	5	usual resident	1378	women_GDHS_14.dta	upper east rural	170	444298		20-24	female		unexposed	upper east	rural	other	islam	secondary/higher	7	poorer	-48666		no		yes	no	no	no	yes	no		yes, paid by a relative / friend	yes, valid		yes	private	outpatient	national health insurance	no	yes	yes	yes	very good	easy	satisfied	satisfied	satisfied
1110	17017 2	GH6	170	17	usual resident	1378	women_GDHS_14.dta	upper east rural	170	444298		30-34	female		unexposed	upper east	rural	mole_dagbani	islam	primary education	3	poorest	-119092		no		yes	no	no	no	yes	no		yes, paid by a relative / friend	yes, valid		yes	public/gov't	outpatient	national health insurance	no	yes	yes	yes	very good	easy	satisfied	satisfied	satisfied
1111	17018 6	GH6	170	18	usual resident	1378	women_GDHS_14.dta	upper east rural	170	444298		40-44	female		unexposed	upper east	rural	mole_dagbani	islam	none	0	poorest	-137392		no		yes	no	no	no	yes	no		yes, paid by a relative / friend	yes, valid		yes	public/gov't	outpatient	national health insurance	no	yes	yes	yes	good	easy	satisfied
1112	17018 8	GH6	170	18	usual resident	1378	women_GDHS_14.dta	upper east rural	170	444298		15-19	female		unexposed	upper east	rural	mole_dagbani	islam	secondary/higher	8	poorest	-137392		no		yes	no	no	no	yes	no		yes, paid by a relative / friend	yes, valid		yes	public/gov't	outpatient	national health insurance	no	yes	yes	yes	good	very easy	satisfied	satisfied	satisfied
1113	17027 10	GH6	170	27	usual resident	1378	women_GDHS_14.dta	upper east rural	170	444298		35-39	female		unexposed	upper east	rural	mole_dagbani	islam	secondary/higher	14	poorest	-114805		no		yes	no	no	no	yes	no		yes, paid by a relative / friend	yes, valid		yes	private	outpatient	national health insurance	no	yes	yes	yes	good	very easy	satisfied	satisfied	satisfied
1114	17032 2	GH6	170	32	usual resident	1378	women_GDHS_14.dta	upper east rural	170	444298		30-34	female		unexposed	upper east	rural	other	islam	none	0	poorest	-129754		no		yes	no	no	no	yes	no		yes, paid myself	yes, valid		yes	public/gov't	outpatient	national health insurance	no	yes	yes	yes	good	easy	satisfied	satisfied	satisfied
1115	171 3 2	GH6	171	3	usual resident	1378	women_GDHS_14.dta	western rural	171	869222		20-24	female		unexposed	western	rural	other	islam	none	0	middle	1547		no		yes	no	no	no	yes	no		8	yes, valid		yes	public/gov't	outpatient	national health insurance	no	yes	yes	no	good	very easy	very satisfied	very satisfied	very satisfied
1116	171 4 1	GH6	171	4	usual resident	1378	women_GDHS_14.dta	western rural	171	869222		35-39	female		unexposed	western	rural	akan	christianity	secondary/higher	10	poorer	-26696		no		yes	no	no	no	yes	no		yes, paid myself	yes, valid		yes	public/gov't	outpatient	national health insurance	no	yes	yes	yes	very good	very easy	very satisfied	very satisfied	very satisfied
1117	172 1 2	GH6	172	1	usual resident	1378	women_GDHS_14.dta	eastern urban	172	875885		40-44	female		unexposed	eastern	urban	ewe	christianity	primary education	2	richer	73311		no		yes	no	no	no	yes	no		yes, paid myself	yes, valid		yes	public/gov't	outpatient	national health insurance	no	yes	yes	yes	very good	very easy	fairly satisfied	satisfied	satisfied
1118	172 1 4	GH6	172	1	usual resident	1378	women_GDHS_14.dta	eastern urban	172	875885		15-19	female		unexposed	eastern	urban	other	christianity	secondary/higher	8	richer	73311		no		yes	no	no	no	yes	no		yes, paid by a relative / friend	yes, valid		yes	public/gov't	outpatient	national health insurance	no	no	no	yes	very good	difficult	satisfied	not satisfied	not satisfied
1119	172 5 1	GH6	172	5	usual resident	1378	women_GDHS_14.dta	eastern urban	172	875885		40-44	female		unexposed	eastern	urban	akan	christianity	secondary/higher	9	richest	115618		yes		yes	no	no	no	yes	no		yes, paid myself	yes, valid		yes	public/gov't	outpatient	national health insurance	no	yes	yes	yes	very good	easy	very satisfied	very satisfied	very satisfied
1120	17210 2	GH6	172	10	usual resident	1378	women_GDHS_14.dta	eastern urban	172	875885		25-29	female		unexposed	eastern	urban	akan	christianity	secondary/higher	15	richest	166907		no		yes	no	no	no	yes	no		yes, paid myself	yes, valid		yes	private	outpatient	national health insurance	no	yes	yes	yes	very good	very easy	satisfied	satisfied	satisfied
[truncated: 1,120 more rows]
[truncated: 13 more columns]
